# 1 Early postmortem mapping of SARS-CoV-2 RNA in patients 2 with COVID-19 and correlation to tissue damage

3  
4 **Stefanie Deinhardt-Emmer<sup>1\*</sup>, Daniel Wittschieber<sup>2\*</sup>, Juliane Sanft<sup>2</sup>, Sandra Kleemann<sup>2</sup>, Stefan  
5 Elschner<sup>2</sup>, Karoline F. Haupt<sup>1</sup>, Vanessa Vau<sup>1</sup>, Clio Häring<sup>3</sup>, Jürgen Rödel<sup>1</sup>, Andreas Henke<sup>3</sup>,  
6 Christina Ehrhardt<sup>3</sup>, Michael Bauer<sup>4</sup>, Mike Philipp<sup>5</sup>, Nikolaus Gaßler<sup>6</sup>, Sandor Nietzsche<sup>7</sup>, Bettina  
7 Löffler<sup>1‡</sup>, Gita Mall<sup>2‡</sup>**

8  
9 1 Institute of Medical Microbiology, Jena University Hospital, Am Klinikum 1, D-07747 Jena, Germany

10 2 Institute of Forensic Medicine, Jena University Hospital, Am Klinikum 1, D-07747 Jena, Germany

11 3 Section of Experimental Virology, Institute of Medical Microbiology, Jena University Hospital, Hans-  
12 Knöll-Str. 2, D-07745, Jena, Germany

13 4 Department of Anaesthesiology and Intensive Care Medicine, Jena University Hospital, Am Klinikum 1,  
14 D-07747 Jena, Germany

15 5 Department of Anaesthesiology and Intensive Care Medicine, Greiz General Hospital, Wichmannstrasse  
16 12, D-07973 Greiz, Germany

17 6 Section of Surgical Pathology, Institute of Forensic Medicine, Jena University Hospital, Am Klinikum 1,  
18 D-07747 Jena, Germany

19 7 Department of Electron microscopy, Jena University Hospital, Ziegelmühlenweg 1, 07743 Jena, Germany

20  
21  
22 \* These authors share first authorship.

23 ‡ These authors share last authorship.

24  
25 Corresponding author:

26  
27 Dr. Stefanie Deinhardt-Emmer

28 Institute of Medical Microbiology

29 Jena University Hospital

30 Am Klinikum 1

31 D-07747 Jena

32 Germany

33 Email: [stefanie.deinhardt-emmer@med.uni-jena.de](mailto:stefanie.deinhardt-emmer@med.uni-jena.de)

34

35

36

37

38

39

40

41

42

43

44

45

46

47 **Abstract (193)**

48 Clinical observations indicate that COVID-19 is a systemic disease. An investigation of the  
49 viral distribution within the human body in correlation to tissue damage can help understanding the  
50 pathophysiology of SARS-CoV-2 infection.

51 We present a detailed mapping of viral RNA in 61 tissues and organs of 11 deceased patients  
52 with the diagnosis COVID-19. The autopsies were performed within the (very) early postmortem  
53 interval (mean: 5.6 hours) to avoid bias due to viral RNA and tissue degradation. Viral loads, blood  
54 levels of cytokines, prothrombotic factors as well as macro- and micro-morphology were correlated.

55 Very high ( $> 10^4$  copies/ml) viral loads were detected in the lungs of most patients and then  
56 correlated to severe tissue damage. Intact viral particles could be verified in the lung tissue by  
57 transmission electron microscopy. Viral loads in the lymph nodes were associated with a loss of  
58 follicular architecture. Viral RNA was detected throughout further extra-pulmonary tissues and  
59 organs without visible tissue damage. Inflammatory cytokines as well as the prothrombotic factors  
60 were elevated in all patients.

61 In conclusion, the dissemination of SARS-CoV-2-RNA throughout the body supports the  
62 hypothesis of a maladaptive host response with viremia and multi-organ dysfunction.

63

64

65 **Keywords:** SARS-CoV-2, COVID-19, early post-mortem interval, autopsy, transmission electron  
66 microscopy, histology

67

68

69

70

71

72

73

74

75

76

## 77 Introduction

78 In December 2019, several cases of pneumonia caused by a novel *Betacoronavirus* called SARS-  
79 CoV-2 were first described in the city of Wuhan in China <sup>1</sup> and therefore named “coronavirus disease  
80 2019” (COVID-19) <sup>2</sup>. Within a few months, the initially localized outbreak spread to countries all over  
81 the globe, being declared a pandemic <sup>3</sup>. At present, more than 8.5 million SARS-CoV-2 infections have  
82 been reported. The number of deaths attributed to COVID-19 has exceeded 450.000 worldwide <sup>4</sup>.

83 COVID-19 occurs in varying degrees of severity. While approximately 81% of COVID-19  
84 patients are experiencing mild symptoms, 14% suffer from respiratory distress <sup>5</sup>. The remaining 5%  
85 enter a critical condition with respiratory failure, endovascular complications, or multiple organ  
86 dysfunctions. Gastroenterological and neurological symptoms have been reported in case studies for  
87 36.4% and 18.6% of COVID-19 patients, respectively <sup>6,7</sup>. The clinical observations suggest that COVID-  
88 19 is a systemic disease.

89 While marginal information is available about the regulation of SARS-CoV-2, Angiotensin-  
90 Converting Enzyme (ACE)2 and Transmembrane Protease Serine 2 (TMPRSS2), two membrane-  
91 bound proteins turned out to be crucial for the entry of the virus into cells <sup>8,9</sup>. ACE2 is not only  
92 expressed in epithelia of the lung but also in several other epithelia, endothelia, heart and renal tissues  
93 <sup>10</sup>. The viral replication and pathogenesis are widely unknown due to the lack of appropriate models  
94 <sup>11</sup>. One crucial step to elucidate the viral pathogenesis is the investigation of the distribution of the  
95 virus within the whole body.

96 In the present study, we (1) included full autopsies, (2) performed the autopsies in the (very)  
97 early post-mortem interval (1.5 – 15 h, mean: 5.6 h), (3) dissected organs and tissues without prior  
98 fixation in formalin, (4) measured SARS-CoV-2 RNA in an extraordinary high number of samples, (5)  
99 correlated viral load to tissue damage using comprehensive histopathological investigations, (6)  
100 visualized virus particles in the pulmonal tissue samples by means of transmission electron  
101 microscopy (TEM), and (7) determined post-mortem serum levels of inflammatory cytokines and  
102 prothrombotic factors. The so far unique feature of sampling in the (very) early post-mortem interval

103 was intended to provide reliable viral RNA (vRNA) measurements, enabled us to obtain blood serum,  
104 and provided well preserved tissue samples for ultrastructural analysis.

105

## 106 **Materials and Methods**

### 107 *Autopsies and post-mortem sampling*

108 The study was approved by the local ethical board (registration no.: 2020-1773). Complete  
109 autopsies (inspection of cranial, thoracic and abdominal cavities plus dissection of all internal organs  
110 and their surrounding anatomical structures) of 11 patients with a SARS-CoV-2 infection (proven by  
111 naso-pharyngeal swab testing during hospitalization) and the clinical diagnosis of COVID-19 were  
112 included in this study. As soon as possible after death the closest relatives were contacted and gave  
113 their informed consent. Contrary to recommendations of the pathological professional societies not to  
114 perform autopsies earlier than 24 hours post-mortem and to store the organs in formalin before  
115 dissecting them, the autopsies in this study were performed 1.5 – 15 h (mean 5.6 hours) post-mortem  
116 and the organs were dissected directly without prior fixation. The same voluntary team including two  
117 experienced forensic pathologists conducted all autopsies considering all necessary precautions and  
118 using the comprehensive personal protective equipment as recommended by professional societies.  
119 The lungs, with high viral loads to be expected, were removed first and dissected last to avoid transfer  
120 of viral RNA to other organs/tissues. At each autopsy, a total of up to 61 native and non-fixed samples  
121 (5 locations of the nervous system, 14 of the respiratory tract with double sampling in the lungs, 10 of  
122 the cardiovascular system, 12 of the gastrointestinal tract, 3 of the urinary tract, 4 of the reproductive  
123 system, 2 of the endocrine system, 6 of the lymphatic system, 2 of hematological tissues and 3 samples  
124 of abdominal skin, abdominal subcutaneous tissue and of musculus psoas major) were collected after  
125 rinsing in clean tap water. Tissue samples were transferred to virological processing immediately after  
126 autopsy; blood samples were centrifuged to obtain serum. Samples of the same anatomical locations  
127 were fixed in 5% buffered formalin solution for comparative histopathological analysis and selected  
128 samples in glutaraldehyde for TEM.

129 *SARS-CoV-2 RNA detection*

130 All tissues were homogenized in RPMI-medium by using the FastPrep-24™ 5G Instrument  
131 (MP Biomedicals, Schwerte, Germany). Throw-away beads (Zymo Research Bashing Bead Lysis  
132 Tubes, Freiburg, Germany) were used to avoid contamination. After centrifugation (2 min, 12.000  
133 rpm) supernatants were collected for the determination of the viral load. The RNA extraction was  
134 performed by using the QIAcube RNeasy Viral Mini Kit (Qiagen, Hilden, Germany) according to  
135 manufacturer's guide. A qRT-PCR from RIDAgene (r-biopharm, Darmstadt, Germany) followed on  
136 Rotor-Gene Q (Qiagen, Hilden, Germany) in order to detect the E-gene of SARS-CoV-2. The RNA  
137 standard curve, prepared from the positive control of the RIDAgene (r-biopharm, Darmstadt,  
138 Germany) kit, was applied for quantification. The following scaling was applied: Very high ( $> 10^4$   
139 copies/ml), high ( $10^3$ - $10^4$  copies/ml), moderate ( $10^2$ - $10^3$  copies/ml), low ( $10^1$ - $10^2$  copies/ml), and below  
140 detection limit (bdl).

141

142 *Detection of inflammatory and thrombotic parameters*

143 For the measurement of proinflammatory cytokines and coagulation parameters, a  
144 LEGENDplex™ Human Thrombosis Panel (13-plex) (BioLegend, San Diego, CA, USA) was used. 25  
145  $\mu$ l of the serum samples were transferred in duplicates into the 96-well filter plate and the  
146 LEGENDplex panel was performed following the manufacturer's instructions. The samples were  
147 measured the same day on a flow cytometer (BD, Accuri) and the protein amount was calculated by  
148 comparison to a standard curve. Serum samples of 5 healthy volunteers without any signs of infection  
149 were age-correlated and analyzed as control.

150

151 *Histopathological analysis*

152 After fixation for at least 24 h in 10% neutral buffered formalin, the tissue samples were  
153 dehydrated in a graded series of ethanol and xylene, mounted in paraffin and cut to 3  $\mu$ m thick  
154 sections. In addition to hematoxylin eosin (HE) stains, other special stains such as EvG, Fe, PAS,

155 abPAS, Giemsa, Gomori Trichrome and Kongo Red were used following routine protocols. For  
156 immunohistochemistry the antibodies detailed in follow were used: AE1/3 (Dako/IR053), TTF-1  
157 (Dako/IR056), CK7 (Dako/IR619), CK5/6 (Dako/IR780), p40 (Zytomed/MSK097), Ki67 (Dako/IR626),  
158 CD68 (Dako/M0876), CD61 (Dako/M0753), CD31 (Dako/IR610), CD34 (Dako/IR623), ASMA  
159 (Dako/IR611), CD3 (Dako/IR503), CD20 (Dako/IR604), MUM1 (Dako/IR644), Collagen IV  
160 (Dako/M0785), Tenascin (Chemicon/MAB19101). All immunostains were performed with the Dako  
161 Omnis immunostainer (Agilent) following routine procedures. The sections were examined  
162 microscopically (Axio Imager.M2, Carl Zeiss Microscopy GmbH), and representative photographs  
163 were taken (AxioCam 506 color, Carl Zeiss Microscopy GmbH; ZEN 2.6 (blue edition), Carl Zeiss  
164 Microscopy GmbH).

165

#### 166 *Transmission electron microscopy*

167 During each autopsy several small pieces of lung tissue (2 mm cubes) were immediately fixed  
168 with freshly prepared modified Karnovsky fixative (4 % w/v paraformaldehyde, 2.5 % v/v  
169 glutaraldehyde in 0.1 M sodium cacodylate buffer pH 7.4) for 24 h at room temperature. After  
170 washing 3 times for 15 min each with 0.1 M sodium cacodylate buffer (pH 7.4) the tissue was further  
171 cut into 1 mm cubes and post-fixed with 2 % w/v osmiumtetroxide for 1 h at room temperature.  
172 During the following dehydration in ascending ethanol series post-staining with 1 % w/v  
173 uranylacetate was performed. Afterwards the samples were embedded in epoxy resin (Araldite) and  
174 sectioned using a Leica Ultracut S (Leica, Wetzlar, Germany). Based on the examination of semi thin  
175 sections regions of interest of approx. 500 µm x 500 µm in size were selected and trimmed. Finally,  
176 ultrathin sections were mounted on filmed Cu grids, post-stained with lead citrate, and studied in a  
177 transmission electron microscope (EM 900, Zeiss, Oberkochen, Germany) at 80 kV and magnifications  
178 of 3,000x to 50,000x. For image recording a 2K slow scan CCD camera (TRS, Moorenweis, Germany)  
179 was used.

180

181 **Results**

182 *SARS-CoV-2 vRNA is detectable in various organs and tissues*

183 The investigation of COVID-19 patients included a full characterization of the clinical  
184 characteristics and parameters (Tab. 1). In detail, patients 1-7 received intensive care; patients 1-6 were  
185 mechanically ventilated; patient 7 was submitted to ECMO (extra-corporal membrane oxygenation);  
186 the patients 1-2 and 5-6 were treated with lopinavir/ritonavir. The patients 8-10 were not subjected to  
187 intensive care or ventilation according to their patients' provisions.

188 Our results show that patients 1-10 died of COVID-19, whereas patient 11 suffered from a  
189 metastasized squamous cell carcinoma of the cervix and died of an ileus following peritoneal  
190 carcinosis (Tab. 2 gives an overview of the macro- and micro-morphological autopsy findings). She  
191 had contracted COVID-19, received intensive care treatment but was not ventilated. Interestingly,  
192 autopsy detected previously undiagnosed malignancies in patients 2 (chronic lymphatic leukemia,  
193 CLL) and 10 (endometrial carcinoma). In addition, patient 6 had an incidentaloma of the thyroid  
194 gland.

195 The determination of the E-gene of SARS-CoV-2 by using qRT-PCR detected a mean of very  
196 high to high viral loads in the lungs of all patients (Fig. 1a). Patients 1-10 showed very high titers,  
197 reaching up to  $10^7$  RNA copies/ml (Fig. 1b). High to moderate to low viral loads were detected in  
198 further structures of the respiratory tract, such as mesopharynx, epiglottis and trachea in patients 1-8.  
199 In patient 10 with a non-COVID-19-associated cause of death, vRNA could only be detected in  
200 moderate to low amounts in the trachea.

201 Patients 1-10 also showed variable (very high to very low) viral loads in at least 2 samples of  
202 the lymphatic system. Lymphatic structures with topological relation to the respiratory tract were  
203 always positive for vRNA.

204 Of the patients with intensive care treatment (patients 1-7), patients 1, 3, 4 and 5 exhibited  
205 moderate to very low viral loads in the cardiac samples (Fig. 1c). Patients 2, 6 and 7 exhibited no

206 vRNA in the heart muscle. The vascular samples showed overall higher viral loads in more patients  
207 than the cardiac samples.

208           Viral RNA could not be detected in the blood except for the patients 3-5. The patients 1, 2, 6  
209 and 7 who were treated with lopinavir/ritonavir were tested negative for the blood. Viral RNA was  
210 present in the bone marrow of all 3 patients who tested positive for the blood but also in further 3  
211 patients who tested negative for the blood.

212           Patients 3-5 had vRNA in variable amounts throughout the small and large intestine. Patients  
213 6 and 7 tested negative for all 12 gastrointestinal samples. Patient 9 is noticeable as almost all  
214 gastrointestinal samples exhibit moderate to very high viral loads.

215           Viral RNA could be detected in endocrine organs, in the urinary tract and in the reproductive  
216 organs as well. Only the patients 3-5 were tested positive for the central nervous system. Skin  
217 (abdominal), subcutaneous tissue (abdominal) and skeletal muscle (psoas major) tested negative in all  
218 patients.

219           Due to the very early post-mortem interval in which the autopsies were performed, we were  
220 able to verify the vRNA findings with TEM of a lung sample of patient 3 by detecting intact SARS-  
221 CoV-2 viral particles within a lung fibrocyte (Fig. 2).

222

#### 223 *Proinflammatory and prothrombotic parameters*

224           To analyze the proinflammatory response of the 11 patients, we measured Interleukin (IL)-6  
225 (Fig. 3a) and IL-8 (Fig. 3b) postmortem. Both parameters showed significantly elevated serum levels in  
226 all cases compared to control levels of 5 healthy volunteers.

227           Since abnormalities in the coagulation system was described for COVID-19 patients<sup>12</sup>, we  
228 analyzed the prothrombotic parameters of the blood of the deceased patients. The disseminated  
229 intravascular coagulation was described previously and one suggested role of coagulation is to limit  
230 the infection dissemination<sup>13</sup>. Additionally, it is discussed that coagulation processes cause hyper-  
231 inflammatory responses in viral infection<sup>14</sup>.



232 Our results show significantly higher serum levels of tissue plasminogen activator (tPa) (Fig.  
233 3c) of COVID-19 patients compared to healthy volunteers. P-Selectin (Fig. 3d), a cell adhesion  
234 molecule of platelets necessary for the recruitment of platelets and the binding process to the  
235 endothelium<sup>15</sup>, was measured in serum levels significantly higher than the controls in all patients. D-  
236 Dimer-serum levels (Fig. 3e) were partly elevated in patients. However, no significant elevation could  
237 be found. The plasminogen activator inhibitor (PAI, Fig. 3f), an important inhibitor of tPa<sup>16</sup>, was  
238 significantly elevated in the blood serum of all patients.

239 A biomarker for potential cardiovascular risk stratification sCD40L (Fig. 3g) was significantly  
240 elevated in all patients. Further, the coagulation Factor IX (Fig. 3h) was measured at significantly  
241 elevated levels in the blood serum of all patients as well. It is discussed to function as a mediator  
242 between viruses and cells<sup>17</sup>. The P-Selektin Glykoprotein Ligand-1 (PSGL-1) could be determined as  
243 not significantly higher than the values within the healthy volunteer group.

244

#### 245 *Macro- and micro-morphologic findings*

246 Macroscopic signs of severe and extensive lung damage were found in all patients. In patients  
247 1, 3-5, 9 and 10, the lungs with prominent hyperemia and edema displayed a fragility of the tissue  
248 (Fig. 4a, b). In contrast, the lungs of patients 6-8 displayed a firmer and more consolidated pattern  
249 with only some aspects of edema and hyperemia (Fig. 4c-e). In the lung of patient 3, a nodular  
250 demarcated damage was found which correlated with a fungal superinfection (Fig. 4f). Patients 6, 9  
251 and 10 had a purulent bronchitis and bronchopneumonia due to a bacterial superinfection, but patient  
252 9 exhibited a severe pharyngitis.

253 Several features of coagulopathies were found including infarction of the lung (Fig. 4g) and  
254 the spleen (Fig. 4h) as well as fulminant thromboses of the periprostatic venous plexus (Fig. 4i) and  
255 hemorrhage of the cerebellum (Fig. 4j). Vascular stasis and fibrinous thrombi were present in patients  
256 1-2 and 8-10. Thrombemboli were found in patients 2, 4, 5 and 10 to a variable extent. In patient 2  
257 pulmonary embolisms were fatal.

258           Microscopically, lung tissues in patients 1, 3-5, 9 and 10 revealed changes similar to the early  
259 (exudative) phase of diffuse alveolar damage (DAD). The consistent acute changes included strong  
260 intraalveolar and interstitial hemorrhages (Fig. 5a, Fig 5b), architectural injuries with a diffuse alveolar  
261 damage pattern (such as hyaline membranes, fibrinous edema and interstitial proliferation), sporadic  
262 signs of cellular inflammation (mostly lymphocytes and few plasma cells) and severe loss of  
263 structured pneumocytes. Frequently, cells with enlarged cytoplasm and big nuclei were found  
264 admixed with multinucleated giant cells and features of squamous metaplasia and pattern of  
265 bronchiolization (Fig. 5a, b, c). Enlarged alveolar cells were detached from the alveolar wall (Fig. 5d).  
266 The clusters of enlarged cells were strongly positive for AE1/3 (Fig. 5e), but only few cells were co-  
267 labeled for TTF1 (Fig. 5f). Lung histology in patients 6-8 displayed a pattern similar to the later  
268 (proliferative) phase of diffuse alveolar damage (DAD). Giant cells and cell aggregates resembling  
269 squamous metaplasia were frequently found and sometimes accompanied by fibroblastic  
270 proliferations (Fig. 5g, h).

271           While the upper lobes of the lung of patient 2 showed only moderate emphysema (Fig. 6a),  
272 the hemorrhagic tissue damage was restricted to the middle and lower lobes of the right and the lower  
273 lobe of left lung (Fig. 6b). Vasculitis-like features were observed in patients 2, 3, 4, 8 and 9 with  
274 sporadic mild lympho-plasma cellular infiltrates around pulmonary artery branches (Fig. 6c, d).  
275 However, in patient 7 a strong lymphocyte-dominant intra-alveolar infiltrate was found (Fig. 6e, f). In  
276 particular, megakaryocytes were sometimes detectable in alveolar capillaries (Fig. 6g, h).

277           A common histological feature in all patients was a loss of follicular architecture in the lymph  
278 nodes with architectural changes (Fig. 7a). In the bone marrow of patient 9, the highest viral loads  
279 were found, and significant hemophagocytosis was detectable by microscopy (Fig. 7b). Interestingly,  
280 the correlation of high viral load and tissue damage as seen for the lung was not found in cardiac or  
281 aortic tissues. The cardiac tissues showed sometimes pre-existing changes (fibrosis and chronic  
282 ischemic damage), but neither severe damage nor inflammation or necrosis of cardiomyocytes were  
283 found (Fig. 7c). Sometimes an increased cellularity in the otherwise unremarkable cardiac tissue was

284 seen (e.g. in patient 1), suggestive for an activated cardio-mesenchyme (Fig. 7d). The large vessels  
285 were unremarkable as well. Figure 6e demonstrates a section of the thoracic aorta of patient 5 from the  
286 same anatomical location as the sample that tested highly positive for vRNA. Neither the intima  
287 (asterisk) nor the upper tunica media displayed any inflammatory cells or tissue damage. In the colon  
288 mucosa strong signs of epithelial damage were not visible using light-microscopy (e.g. patient 3; Fig.  
289 7g), and the histology of the pancreas was well preserved (e.g. patient 9; Fig. 7h).

290

## 291 **Discussion**

292 In clinical practice, many critically ill COVID-19 patients show multiple organ involvement  
293 apart from lung failure, in particular vascular dysfunction, such as thrombosis and/or impaired  
294 microcirculation<sup>18</sup>. A dysregulated immune response was observed starting with a phase of immuno-  
295 suppression followed by a proinflammatory phase up to a cytokine storm<sup>19</sup>. The cytokine storm might  
296 play an important role and supports the hypothesis that COVID-19 could have a strong  
297 immunopathological component.

298 Regarding viral pathogenesis and toxicity of the novel SARS-CoV-2, some aspects are known  
299 based on previous studies with SARS-CoV<sup>20</sup>. The virus can infect nasal mucous cells, pneumocytes  
300 and alveolar macrophages. ACE2 is the main receptor for the cellular binding process<sup>11</sup>. Since the  
301 ACE2 receptor is expressed not only by cells in the respiratory system<sup>21</sup> it is reasonable to assume,  
302 that other organ systems can also be targeted by SARS-CoV-2.

303 Quite a few morphological studies have been published so far. Some are single case reports  
304 based on necropsies of lung, liver and heart<sup>22</sup>, partial autopsies of the thoracic cavity<sup>23</sup> or full  
305 autopsies<sup>24</sup>. Some represent small (n = 2–3) case series based on surgical lung resectates<sup>25</sup> or on full  
306 autopsies<sup>26–29</sup>. The larger case studies (n = 7–21) focus on single organs like the lungs<sup>30</sup>, the spleen<sup>31</sup>, the  
307 kidneys<sup>32</sup> or heart and lungs<sup>33,34</sup> or report comprehensive organ findings obtained by minimally  
308 invasive sampling<sup>35</sup> or full autopsies<sup>36–39</sup>. Only few of the aforementioned autopsy studies report viral  
309 loads in selected organs and tissues<sup>27,32,36,38</sup>. The post-mortem interval between death and autopsy was

310 over 48 h<sup>40</sup>, 11-84.5 h<sup>36</sup>, 1-5 d<sup>38</sup>, 4 d (on average with a maximum of 12 d)<sup>39</sup>. The sample size of our case  
311 series can be compared to the larger autopsy case series from literature. Edler et al.<sup>39</sup> report the gross  
312 results of 80 autopsies from a still larger case series, but present histological investigations of the first  
313 12 cases only. To our knowledge, the present study is the only one so far that focused on keeping the  
314 post-mortem interval as small as possible to avoid bias due to degradation of SARS-CoV-2 virus  
315 particles, SARS-CoV-2 RNA and tissue ultrastructure. Regarding vRNA degradation, the values  
316 reported by Puelles et al.<sup>32</sup> show comparatively low viral loads among their cases, even in the lungs as  
317 primary target of SARS-CoV-2. Wichmann et al.<sup>38</sup> reported the highest values in the lungs with 1.2 x  
318 10<sup>4</sup> to 9 x 10<sup>9</sup> copies/ml, while our highest values reached up to 10<sup>7</sup> vRNA copies/ml. To our  
319 knowledge, the present study is also the only one so far that measured viral loads in a wide variety of  
320 organs and tissues by taking and processing 61 samples per patient. The importance of multiple  
321 sampling within one organ is emphasized by the results of patient 10 (Fig. 1b), where only 2 of on the  
322 whole 7 samples from the heart were positive. If only one sample had been taken, the viral loads could  
323 have been false negative. Based on the mapping of SARS-CoV-2 RNA throughout the whole human  
324 body, we were able to correlate viral loads in many organs and tissues to macro- and  
325 micromorphology. So far, TEM has been applied to the lung samples only to verify the presence of  
326 intact virus particles.

327 We detected the highest viral loads and the most severe tissue damage in the lungs. The lung  
328 samples of all patients showed large cells, sometimes multinucleated giant cells, similar to giant cells  
329 described in cases of a respiratory syncytial virus (RSV) infection. The preliminary immuno-staining  
330 pattern of the enlarged cells indicated that they represent affected pneumocytes. Squamous  
331 (metaplastic) large cells and clusters of giant cells are reported by most morphological studies, except  
332 for one<sup>30</sup>. Our remaining findings in the lung samples agree very well with the findings of the other  
333 work groups, especially with data by Nunes Duarte-Neto et al.<sup>35</sup>. The strict topological correlation of  
334 viral loads and histopathological damage is emphasized by the results in patient 2. The samples from  
335 the upper lung lobes showed normal unremarkable tissue (Fig. 6a) corresponding to negative viral

336 loads, while the samples from the lower lung lobes revealed severe tissue damage corresponding to  
337 high and moderate viral loads (Fig. 6b).

338 All patients who died due to COVID-19 (patients 1-10) had viral RNA in at least some samples  
339 of the lymphatic tissue. Lymphatic tissue with topological relation to the respiratory tract (e.g. tonsils,  
340 cervical lymph nodes, hilar lymph nodes) was overall more positive than lymphatic tissue without  
341 such topological relation (e.g. mesenteric lymph nodes, spleen, appendix). One remarkable finding in  
342 the lymph node samples of all patients was the loss of follicular structure (Fig. 7a). An atrophy of  
343 lymphatic tissue has been described for the SARS-CoV infection by Gu et al.<sup>41</sup> and discussed as a  
344 crucial determinant of disease outcome by Perlman and Dandekar<sup>42</sup>. The spleen was positive in  
345 patients 1, 3, 4, 5 and 9 who presented with the micro-morphology of early lung damage and negative  
346 in the patients 6, 7, 8 and 10 who presented with the micro-morphology of later lung damage or did  
347 not die of COVID-19-pneumonia (patient 2). A further interpretation of viral loads in the appendix is  
348 futile since the appendix showed age-related and chronic pathologic changes accompanied by a loss of  
349 lymphatic tissue.

350 Viral loads in the cardiac tissue were moderate to very low and systematically (all samples)  
351 detected in the patients with early lung damage, while patients with later lung damage displayed  
352 viral loads only sporadically or not at all. The cardiac histology of the left ventricle, anterior wall,  
353 basal part of patient 1 with moderate viral load is presented in Fig. 7c, d. Except for an activation of  
354 mesenchymal cells, which needs further investigation, the histology was unremarkable. In accord  
355 with Buja et al.<sup>33</sup> we also found a pericarditis in patient 1 and multifocal acute injury of  
356 cardiomyocytes which is frequently observed in critically ill patients under catecholamine therapy.

357 The viral loads in the samples from the vascular tissue (aorta and pulmonary artery) followed  
358 a similar distribution pattern depending on the stage of lung damage but were higher compared to the  
359 cardiac tissue. The unremarkable histology of the thoracic aorta of patient 5 with a high viral load is  
360 presented in Fig. 7e, f. The conclusion by Varga et al.<sup>29</sup> that SARS-CoV-2 induces an endothelitis  
361 cannot be comprehended.

362 The viral loads in the gastrointestinal tract were variable. The very high viral loads in patient 9  
363 throughout the upper gastrointestinal tract as well as in the small and large bowels appear noticeable.  
364 The histology of the corresponding tissue samples was unremarkable. According to the clinical  
365 documentation, patient 9 did not exhibit any gastrointestinal symptoms.

366 Viral RNA could also be detected in low to very high amounts in the samples from the  
367 endocrine organs, the urinary tract, the nervous system, and the reproductive system. Interestingly,  
368 the samples of the patients 1, 2, 6 and 7 who were treated with lopinavir/ritonavir were tested  
369 negative.

370 The same distribution pattern among the patients was observed regarding the viral RNA in  
371 the blood. Apart from the patients 8-11 who were not under intensive care (patients 8-10) or did not  
372 die of COVID-19 (patient 11), it is noticeable that among the patients receiving intensive care prior to  
373 death (patients 1-7) only the patients 3, 4 and 5 were tested positive for the blood, while the patients 1,  
374 2, 6 and 7 tested negative. The latter patients were treated with lopinavir/ritonavir, so that an effect of  
375 antiviral medication on preventing viremia may be suggested.

376 The patients with viral RNA in the blood also showed viral RNA in the bone marrow. The  
377 patients 1, 8 and 9 were negative in the blood but positive in the bone marrow. Patient 9 showed by  
378 far the highest viral loads in the bone marrow. Histology of the bone marrow apart from  
379 hypercellularity, left shift and an increased number of megakarocytes showed a significant amount of  
380 hemophagocytosis (Fig. 6b). Hemophagocytosis is a morphological feature of the makrophage  
381 activation syndrome (MAS) or the hemophagocytic lymphohistiocytosis (HLH)<sup>43,44</sup>. The clinical  
382 characteristics of COVID-19, including very high ferritin levels and very high proinflammatory  
383 interleukins, resemble MAS and HLH<sup>45</sup> and have already encouraged therapeutically  
384 attempts<sup>46</sup>. Further studies are needed in order to clarify this aspect.

385 To further elucidate the immunological host response, we measured interleukin 6 and  
386 interleukin 8 in the postmortem serum samples. The serum levels of interleukin 6 were significantly

387 elevated in all patients including patient 11 who died of multiple organ failure following an ileus. The  
388 serum levels of interleukin 8 were significantly elevated as well.

389 In accordance with other autopsy studies<sup>38,40</sup> we observed thrombo-embolic events in 4 of the  
390 11 patients. Patients 2 died of pulmonary embolism and patient 4 suffered multiple lung and spleen  
391 infarctions due to venous thromboses. The patients 5 and 10 presented with sporadic emboli in the  
392 lung histology. In conjunction with a general impairment of microcirculation, histologically visible as  
393 homogenous eosinophilic sludge in the small arterioles, capillaries and venules in multiple organ  
394 samples from patients 1, 8 and 9, on the whole 7 (of 11) patients suffered hyper-coagulation. Some  
395 studies hypothesize that SARS-CoV-2 can induce non-coordinated reactions between the coagulation  
396 and fibrinolysis systems that result in hyper-coagulation and hemorrhage<sup>18</sup>. The measured pro-  
397 thrombotic factors were almost all significantly elevated in all patients.

398 In sum, we presented an autopsy series of 11 patients with COVID-19. The autopsies were  
399 performed in the (very) early postmortem interval to avoid bias due to degradation of vRNA, virus  
400 particles, and tissue structures. SARS-CoV-2 RNA could be detected in very high to high amounts in  
401 the lungs and in very high to very low amounts in the lymphatic tissue. TEM visualized SARS-CoV-2  
402 particles in the lung tissue. Viral loads and histological tissue damage were strongly correlated in the  
403 lungs even on the organ level (patient 2). Histological structure changes were also present in the  
404 lymph nodes (atrophy and loss of follicles). Considerable viral loads were detected in many other  
405 tissue samples from different extra-pulmonary organs and tissues without (light)microscopically  
406 evident tissue damage.

407 In conclusion, SARS-CoV-2 may be able to infect different cell types in different organs and  
408 tissues but may not be able to replicate in non-respiratory organs/tissues as efficiently as in the  
409 respiratory ones. This hypothesis might explain the range from severe tissue damage with clear  
410 cytopathic effects in lung tissue to the unremarkable histology of extra-pulmonary tissues despite  
411 similar viral loads. Infected extra-pulmonary cells could nevertheless contribute to inflammation,  
412 hyper-coagulation and multiple organ dysfunction.

413 **Acknowledgments**

414 We thank Jenny Pfeifer, Nico Möller, Cornelia Jacob and Christine Weiler with her fellow technicians  
415 for their excellent technical support.

416

417 **Conflict of Interest**

418 The authors declare no conflict of interest.

419

420 **Funding**

421 The authors acknowledge the support of this work by a grant from the IZKF (ACSP02). In addition,  
422 the project was funded by the Carl Zeiss Foundation.

423

424

425

426

427



428  
429  
430  
431  
432  
433  
434  
435  
436  
437  
438  
439  
440  
441  
442  
443  
444  
445  
446  
447  
448  
449  
450  
451  
452  
453  
454  
455  
456  
457  
458  
459  
460  
461  
462  
463  
464  
465  
466  
467  
468  
469  
470  
471  
472  
473  
474

## References

- 1 Zhu, N. *et al.* A Novel Coronavirus from Patients with Pneumonia in China, 2019. *N Engl J Med* **382**, 727-733, doi:10.1056/NEJMoa2001017 (2020).
- 2 Lu, R. *et al.* Genomic characterisation and epidemiology of 2019 novel coronavirus: implications for virus origins and receptor binding. *The Lancet* **395**, 565-574, doi:[https://doi.org/10.1016/S0140-6736\(20\)30251-8](https://doi.org/10.1016/S0140-6736(20)30251-8) (2020).
- 3 El Zowalaty, M. E. & Järhult, J. D. From SARS to COVID-19: A previously unknown SARS- related coronavirus (SARS-CoV-2) of pandemic potential infecting humans - Call for a One Health approach. *One Health* **9**, 100124-100124, doi:10.1016/j.onehlt.2020.100124 (2020).
- 4 Dong, E., Du, H. & Gardner, L. An interactive web-based dashboard to track COVID-19 in real time. *The Lancet Infectious Diseases* **20**, 533-534, doi:[https://doi.org/10.1016/S1473-3099\(20\)30120-1](https://doi.org/10.1016/S1473-3099(20)30120-1) (2020).
- 5 Wu, Z. & McGoogan, J. M. Characteristics of and Important Lessons From the Coronavirus Disease 2019 (COVID-19) Outbreak in China: Summary of a Report of 72 314 Cases From the Chinese Center for Disease Control and Prevention. *JAMA* **323**, 1239-1242, doi:10.1001/jama.2020.2648 (2020).
- 6 Pan, L. *et al.* Clinical Characteristics of COVID-19 Patients With Digestive Symptoms in Hubei, China: A Descriptive, Cross-Sectional, Multicenter Study. *The American journal of gastroenterology* **115**, 766-773, doi:10.14309/ajg.0000000000000620 (2020).
- 7 Mao, L. *et al.* Neurologic Manifestations of Hospitalized Patients With Coronavirus Disease 2019 in Wuhan, China. *JAMA Neurology*, doi:10.1001/jamaneurol.2020.1127 (2020).
- 8 Wang, Q. *et al.* Structural and Functional Basis of SARS-CoV-2 Entry by Using Human ACE2. *Cell*, doi:<https://doi.org/10.1016/j.cell.2020.03.045> (2020).
- 9 Hoffmann, M. *et al.* SARS-CoV-2 Cell Entry Depends on ACE2 and TMPRSS2 and Is Blocked by a Clinically Proven Protease Inhibitor. *Cell* **181**, 271-280.e278, doi:10.1016/j.cell.2020.02.052 (2020).
- 10 Hamming, I. *et al.* Tissue distribution of ACE2 protein, the functional receptor for SARS coronavirus. A first step in understanding SARS pathogenesis. *The Journal of pathology* **203**, 631-637, doi:10.1002/path.1570 (2004).
- 11 Bar-On, Y. M., Flamholz, A., Phillips, R. & Milo, R. SARS-CoV-2 (COVID-19) by the numbers. *eLife* **9**, doi:10.7554/eLife.57309 (2020).
- 12 Connors, J. M. & Levy, J. H. COVID-19 and its implications for thrombosis and anticoagulation. *Blood* **135**, 2033-2040, doi:10.1182/blood.2020006000 (2020).
- 13 Antoniak, S. The coagulation system in host defense. *Research and Practice in Thrombosis and Haemostasis* **2**, 549-557, doi:10.1002/rth2.12109 (2018).
- 14 Yang, Y. & Tang, H. Aberrant coagulation causes a hyper-inflammatory response in severe influenza pneumonia. *Cell Mol Immunol* **13**, 432-442, doi:10.1038/cmi.2016.1 (2016).
- 15 Furie, B. & Furie, B. C. Role of platelet P-selectin and microparticle PSGL-1 in thrombus formation. *Trends in Molecular Medicine* **10**, 171-178, doi:10.1016/j.molmed.2004.02.008 (2004).
- 16 Cesari, M., Pahor, M. & Incalzi, R. A. Plasminogen activator inhibitor-1 (PAI-1): a key factor linking fibrinolysis and age-related subclinical and clinical conditions. *Cardiovasc Ther* **28**, e72-e91, doi:10.1111/j.1755-5922.2010.00171.x (2010).

- 475 17 Lenman, A. *et al.* Coagulation Factor IX Mediates Serotype-Specific Binding of Species  
476 A Adenoviruses to Host Cells. *Journal of virology* **85**, 13420, doi:10.1128/JVI.06088-11  
477 (2011).
- 478 18 Ji, H.-L., Zhao, R., Matalon, S. & Matthay, M. A. Elevated Plasmin(ogen) as a Common  
479 Risk Factor for COVID-19 Susceptibility. *Physiological Reviews* **100**, 1065-1075,  
480 doi:10.1152/physrev.00013.2020 (2020).
- 481 19 Li, H. *et al.* SARS-CoV-2 and viral sepsis: observations and hypotheses. *Lancet*, S0140-  
482 6736(0120)30920-X, doi:10.1016/S0140-6736(20)30920-X (2020).
- 483 20 Qian, Z. *et al.* Innate immune response of human alveolar type II cells infected with  
484 severe acute respiratory syndrome-coronavirus. *American journal of respiratory cell  
485 and molecular biology* **48**, 742-748, doi:10.1165/rcmb.2012-0339OC (2013).
- 486 21 Jia, H. P. *et al.* ACE2 receptor expression and severe acute respiratory syndrome  
487 coronavirus infection depend on differentiation of human airway epithelia. *Journal of  
488 virology* **79**, 14614-14621, doi:10.1128/JVI.79.23.14614-14621.2005 (2005).
- 489 22 Xu, Z. *et al.* Pathological findings of COVID-19 associated with acute respiratory  
490 distress syndrome. *Lancet Respir Med* **8**, 420-422, doi:10.1016/S2213-  
491 2600(20)30076-X (2020).
- 492 23 Karami, P. *et al.* Mortality of a pregnant patient diagnosed with COVID-19: A case  
493 report with clinical, radiological, and histopathological findings. *Travel Med Infect Dis*,  
494 101665, doi:10.1016/j.tmaid.2020.101665 (2020).
- 495 24 Aguiar, D., Lobrinus, J. A., Schibler, M., Fracasso, T. & Lardi, C. Inside the lungs of  
496 COVID-19 disease. *Int J Legal Med*, doi:10.1007/s00414-020-02318-9 (2020).
- 497 25 Tian, S. *et al.* Pulmonary Pathology of Early-Phase 2019 Novel Coronavirus (COVID-  
498 19) Pneumonia in Two Patients With Lung Cancer. *J Thorac Oncol* **15**, 700-704,  
499 doi:10.1016/j.jtho.2020.02.010 (2020).
- 500 26 Ding, Y. *et al.* The clinical pathology of severe acute respiratory syndrome (SARS): a  
501 report from China. *J Pathol* **200**, 282-289, doi:10.1002/path.1440 (2003).
- 502 27 Sekulic, M. *et al.* Molecular Detection of SARS-CoV-2 Infection in FFPE Samples and  
503 Histopathologic Findings in Fatal SARS-CoV-2 Cases. *Am J Clin Pathol*,  
504 doi:10.1093/ajcp/aqaa091 (2020).
- 505 28 Barton, L. M., Duval, E. J., Stroberg, E., Ghosh, S. & Mukhopadhyay, S. COVID-19  
506 Autopsies, Oklahoma, USA. *Am J Clin Pathol* **153**, 725-733, doi:10.1093/ajcp/aqaa062  
507 (2020).
- 508 29 Varga, Z. *et al.* Endothelial cell infection and endotheliitis in COVID-19. *Lancet* **395**,  
509 1417-1418, doi:10.1016/S0140-6736(20)30937-5 (2020).
- 510 30 Ackermann, M. *et al.* Pulmonary Vascular Endothelialitis, Thrombosis, and  
511 Angiogenesis in Covid-19. *N Engl J Med*, doi:10.1056/NEJMoa2015432 (2020).
- 512 31 Xu, X. *et al.* [Pathological changes of the spleen in ten patients with new coronavirus  
513 infection by minimally invasive autopsies]. *Zhonghua Bing Li Xue Za Zhi* **49**, E014,  
514 doi:10.3760/cma.j.cn112151-20200401-00278 (2020).
- 515 32 Puelles, V. G. *et al.* Multiorgan and Renal Tropism of SARS-CoV-2. *N Engl J Med*,  
516 doi:10.1056/NEJMc2011400 (2020).
- 517 33 Buja, L. M. *et al.* The emerging spectrum of cardiopulmonary pathology of the  
518 coronavirus disease 2019 (COVID-19): Report of 3 autopsies from Houston, Texas,  
519 and review of autopsy findings from other United States cities. *Cardiovascular  
520 Pathology* **48**, 107233, doi:<https://doi.org/10.1016/j.carpath.2020.107233> (2020).

- 521 34 Fox, S. E. *et al.* Pulmonary and cardiac pathology in African American patients with  
522 COVID-19: an autopsy series from New Orleans. *Lancet Respir Med*,  
523 doi:10.1016/S2213-2600(20)30243-5 (2020).
- 524 35 Nunes Duarte-Neto, A. *et al.* Pulmonary and systemic involvement of COVID-19  
525 assessed by ultrasound-guided minimally invasive autopsy. *Histopathology*,  
526 doi:10.1111/his.14160 (2020).
- 527 36 Menter, T. *et al.* Post-mortem examination of COVID19 patients reveals diffuse  
528 alveolar damage with severe capillary congestion and variegated findings of lungs  
529 and other organs suggesting vascular dysfunction. *Histopathology*,  
530 doi:10.1111/his.14134 (2020).
- 531 37 Schaller, T. *et al.* Postmortem Examinations of Patients With COVID-19. *JAMA*,  
532 doi:10.1001/jama.2020.8907 (2020).
- 533 38 Wichmann, D. *et al.* Autopsy Findings and Venous Thromboembolism in Patients  
534 With COVID-19: A Prospective Cohort Study. *Ann Intern Med*, doi:10.7326/M20-2003  
535 (2020).
- 536 39 Edler, C. *et al.* Dying with SARS-CoV-2 infection-an autopsy study of the first  
537 consecutive 80 cases in Hamburg, Germany. *Int J Legal Med*, doi:10.1007/s00414-  
538 020-02317-w (2020).
- 539 40 Lax, S. F. *et al.* Pulmonary Arterial Thrombosis in COVID-19 With Fatal Outcome:  
540 Results From a Prospective, Single-Center, Clinicopathologic Case Series. *Annals of*  
541 *Internal Medicine*, doi:10.7326/m20-2566 (2020).
- 542 41 Gu, J. *et al.* Multiple organ infection and the pathogenesis of SARS. *J Exp Med* **202**,  
543 415-424, doi:10.1084/jem.20050828 (2005).
- 544 42 Perlman, S. & Dandekar, A. A. Immunopathogenesis of coronavirus infections:  
545 Implications for SARS. *Nat Rev Immunol* **5**, 917-927, doi:10.1038/nri1732 (2005).
- 546 43 Crayne, C. B., Albeituni, S., Nichols, K. E. & Cron, R. Q. The Immunology of  
547 Macrophage Activation Syndrome. *Front Immunol* **10**, doi:ARTN 119  
548 10.3389/fimmu.2019.00119 (2019).
- 549 44 Al-Samkari, H. & Berliner, N. Hemophagocytic Lymphohistiocytosis. *Annu Rev Pathol-*  
550 *Mech* **13**, 27-49, doi:10.1146/annurev-pathol-020117-043625 (2018).
- 551 45 Colafrancesco, S., Alessandri, C., Conti, F. & Priori, R. COVID-19 gone bad: A new  
552 character in the spectrum of the hyperferritinemic syndrome? *Autoimmunity Reviews*  
553 **19**, 102573, doi:10.1016/j.autrev.2020.102573 (2020).
- 554 46 Dimopoulos, G. *et al.* Favorable Anakinra Responses in Severe Covid-19 Patients with  
555 Secondary Hemophagocytic Lymphohistiocytosis. *Cell Host & Microbe*,  
556 doi:10.1016/j.chom.2020.05.007 (2020).
- 557

# 1 Early postmortem mapping of SARS-CoV-2 RNA in patients 2 with COVID-19 and correlation to tissue damage

3

4 Stefanie Deinhardt-Emmer<sup>1\*</sup>, Daniel Wittschieber<sup>2\*</sup>, Juliane Sanft<sup>2</sup>, Sandra Kleemann<sup>2</sup>, Stefan  
5 Elschner<sup>2</sup>, Karoline F. Haupt<sup>1</sup>, Vanessa Vau<sup>1</sup>, Clio Häring<sup>3</sup>, Jürgen Rödel<sup>1</sup>, Andreas Henke<sup>3</sup>,  
6 Christina Ehrhardt<sup>3</sup>, Michael Bauer<sup>4</sup>, Mike Philipp<sup>5</sup>, Nikolaus Gaßler<sup>6</sup>, Sandor Nietzsche<sup>7</sup>, Bettina  
7 Löffler<sup>1‡</sup>, Gita Mall<sup>2‡</sup>

8

## 9 Figure Legends:

10 **Fig. 1a Overview of SARS-CoV-2 vRNA throughout the human body.** Postmortem  
11 determination of SARS-CoV-2 RNA with qRT-PCR of homogenized organs and tissues in  
12 copies/ml represented as decadic logarithm of 11 patients with mean value and standard  
13 deviation (SD) of the following systems: respiratory system, lymphatic system,  
14 gastrointestinal tract, urinary tract, nervous system, cardiovascular system, hematological  
15 tissues, reproductive system, and endocrine system. Intensity of colors describes the amount  
16 of RNA. Abbrev.: bdl (below detection limit), UL (upper lobe), ML (middle lobe), LL (lower  
17 lobe), LV (left ventricle), sr (suprarenal), VS (ventricular septum), RV (right ventricle), aw  
18 (anterior wall), pw (posterior wall), bp (basal part), ap (apical part), paraaort. (paraaortal).  
19 Figure was created by using Servier medical arts.

20 **Fig. 1b Individual vRNA load of the respiratory system, the lymphatic system, the**  
21 **cardiovascular system and hematological tissues.** Postmortem determination of SARS-CoV-  
22 2 RNA with qRT-PCR of homogenized organs and tissues in copies/ml represented as  
23 decadic logarithm of 11 patients. Abbrev.: bdl (below detection limit), UL (upper lobe), ML  
24 (middle lobe), LL (lower lobe), LV (left ventricle), sr (suprarenal), VS (ventricular septum),  
25 RV (right ventricle), aw (anterior wall), pw (posterior wall), bp (basal part), ap (apical part),  
26 nd (not determined), np (not present). Intensity of colors describes the amount of RNA.

27 **Fig. 1c Individual vRNA load of the gastrointestinal tract, the endocrine system, the**  
28 **urinary tract, the nervous system, and the reproductive system.** Postmortem determination  
29 of SARS-CoV-2 RNA with qRT-PCR of homogenized organs and tissues in copies/ml  
30 represented as decadic logarithm from patient 1-11. Abbrev.: bdl (below detection limit), nd  
31 (not determined), np (not present). Intensity of colors describes the amount of RNA.

32 **Fig.2 Transmission electron microscopic image of the lung tissue of patient 3.** (a) Alveolar  
33 septum showing intact capillaries with erythrocytes (asterisk) and the air space (cross). The  
34 blood-air barrier is damaged as the pneumocytes are missing and the basal membrane is  
35 exposed to air (arrowheads). (b-e) Close-ups of the 4 boxed regions in (a) from left to right

36 showing SARS-CoV-2 virus particles encased in plasmatic vesicles of alveolar fibrocytes. (f)  
37 Reference image of SARS-CoV-2 virus particles proliferated in cell culture (vero76).

38 **Fig. 3 Proinflammatory and prothrombotic factors.** Blood analysis of patient 1-11 by using  
39 Legendplex Panel (Biolegend, CA, USA) of the proinflammatory cytokines Interleukin (IL)-6  
40 (a) and IL-8 (b) as well as tissue plasminogen activator (tPa) (c), P-Selectin (d), D-Dimer (e),  
41 Plasminogen activator inhibitor-1 (PAI) (f), soluble (s)CD40ligand(L) (g), Factor IX (h) and  
42 the P-selectin glycoprotein ligand 1 (PSGL-1) (i) in pg/ml compared to the mean of five  
43 controls (Control, healthy volunteers). Unpaired t-test, Mann-Whitney test  $p < 0.005$  \*\*\*;  
44  $p < 0.05$  \*\*; ns=not significant.

45 **Fig. 4 Macromorphology findings of COVID-19 patients.**

46 (a) Pneumonectomy of patient 1 showed strong congestion with liquids and hemorrhages.  
47 The tissue consistency was fragile.

48 (b) Cut surface of lung tissue in higher magnification as shown in (a). The pleura shows  
49 further hemorrhages.

50 (c) Pneumonectomy of patient 7 showed a more solid lung tissue without congestion. The  
51 tissue consistency was very firm.

52 (d) Cut surface of lung tissue in higher magnification as shown in (c). Lung tissue was  
53 retracted adjacent to the bronchus.

54 (e) Pale pleura visceralis of the lung of patient 6 with disseminated hemorrhages and signs of  
55 disturbed ventilation.

56 (f) Nodular transformation of lung tissue as phenomenon of fungal superinfection in patient  
57 3.

58 (g) Hemorrhagic lung infarct in patient 4 due to a thrombembolus in a pulmonary artery  
59 branch.

60 (h) Anemic spleen infarct due to a clotted small artery in patient 4.

61 (i) Fulminant stasis and thromboses in the periprostatic plexus in patient 4.

62 (j) Cerebellar infarction (hemorrhagic) in patient 9.

63

64

65 **Fig. 5 Micromorphology lung findings of COVID-19 patients.**

66 (a) Destroyed lung tissue with intraalveolar hemorrhagia and aggregates of prominent  
67 epithelial cells resembling squamous metaplasia (patient 1; HE).

68 (b) Strong architectural damage of lung alveolar tissue with disruption of the epithelial  
69 barrier and intraalveolar accumulation of enlarged cells with prominent nuclei and visible  
70 nucleoli. Initial syncytial pattern is given (patient 2; HE).

71 (c) Lung tissues with multinucleated giant cells admixed with only few lymphocytes (patient  
72 4; HE).

73 (d) Alveolar unit with band-like desquamation of the alveolar epithelial cells in the alveolar  
74 space partially filled with liquids, erythrocytes and few lymphocytes (patient 5; HE).

75 (e) Multinucleated giant cell in an alveolar space is strongly positive for keratins (patient 4;  
76 immunostaining AE1/3).

77 (f) Serial section of (e), the multinucleated giant cell after immunostaining against TTF1  
78 (patient 4; immunostaining TTF1).

79 (g) Lung tissue with interstitial fibrosis (patient 8; EvG).

80 (h) Lung tissue with interstitial and intra-alveolar fibrosis (patient 8; EvG).

81

82

83 **Fig. 6 Micromorphology lung findings of COVID-19 patients.**

84 (a) Lung tissue with minimal emphysematic changes derived from the upper lobes without  
85 detectable viral loads (patient 2; HE).

86 (b) Severe hemorrhagic pneumonia in specimens from the lower lobes with high viral loads  
87 (patient 2; HE).

88 (c) Vasculitis-like changes around pulmonary artery branches (patient 4; HE).

89 (d) Damaged lung tissue with hemostasis and inflammatory changes adjacent to the  
90 pulmonary artery branch (patient 4; HE).

91 (e) Strong lymphocytic-predominant infiltration of lung tissues with hemorrhagia and  
92 interstitial edema (patient 7; HE).

93 (f) Higher magnification of the lymphocytic-predominant infiltrate (patient 7; HE).

94 (g) Lung tissue with a large nucleated cell in an alveolar capillary, suggestive for a  
95 megakaryocyte (arrow; patient 9; HE).

96 (h) The same tissue after immunostaining against CD61 (patient 9; immunostaining CD61).

97

98

99 **Fig. 7 Extra-pulmonary micromorphology findings of COVID-19 patients.**

100 (a) Overview of a mediastinal lymphnode with some nodular aggregates of lymphocytes, but  
101 destroyed lymphofollicular structures (patient 5; HE).

102 (b) Bone marrow with prominent hemophagocytosis (arrow) and maturing cells of the  
103 hematopoiesis (patient 9; HE).

104 (c) Myocardial tissue of the left ventricle (patient 1; HE).

105 (d) Myocardial tissue of the left ventricle in higher magnification with a minimal increase in  
106 cellularity indicating for an activated cardiomesenchyme (patient 1; HE).

107 (e) Thoracic aorta with a low number of non-inflammatory nucleated cells in an unsuspecting  
108 matrix (patient 5; HE).

109 (f) Tissue from the thoracic aorta in higher magnification. The endothelium is labeled with an  
110 asterisk (patient 5; HE).

111 (g) Colon mucosa with a crypt lined by goblet cells and enterocytes without any strong  
112 intraepithelial inflammation (patient 3; HE).

113 (h) Exocrine pancreas tissue with structural intact acini without inflammatory cells (patient 9;  
114 HE).



# **Early postmortem mapping of SARS-CoV-2 RNA in patients with COVID-19 and correlation to tissue damage**

**Figures**

# Figure 1a

| Respiratory system   |      |      |
|----------------------|------|------|
|                      | Mean | SD   |
| Mesopharynx          | 2.14 | 1.35 |
| Epiglottis           | 2.75 | 1.93 |
| Trachea middle       | 2.67 | 1.83 |
| Tracheal bifurcation | 3.73 | 2.39 |
| Right lung, UL       | 3.99 | 2.42 |
| Right lung, ML       | 4.02 | 2.04 |
| Right lung, LL       | 4.29 | 2.42 |
| Left lung, UL        | 4.10 | 1.98 |
| Left lung, LL        | 2.06 | 1.78 |

| Lymphatic system     |      |      |
|----------------------|------|------|
|                      | Mean | SD   |
| Tonsilla palatina    | 2.01 | 1.77 |
| Cervical lymph nodes | 2.51 | 1.42 |
| Hilar lymph nodes    | 3.07 | 1.50 |
| Paraort. lymph nodes | 1.59 | 1.58 |
| Spleen               | 0.72 | 0.97 |
| Appendix vermiformis | 0.72 | 1.09 |

| Gastrointestinal tract |      |      |
|------------------------|------|------|
|                        | Mean | SD   |
| Tongue                 | 1.66 | 1.53 |
| Gl. submandibularis    | 0.94 | 0.82 |
| Oesophagus             | 1.62 | 1.52 |
| Stomach, corpus        | 0.91 | 1.87 |
| Duodenum               | 0.88 | 1.54 |
| Jejunum                | 1.00 | 1.45 |
| Pancreas               | 0.24 | 0.59 |
| Liver                  | 0.76 | 0.98 |
| Gall bladder           | 0.40 | 0.72 |
| Ileum                  | 1.34 | 1.86 |
| Colon                  | 1.03 | 1.83 |
| Rectum                 | 0.86 | 1.06 |

| Endocrine system |      |      |
|------------------|------|------|
|                  | Mean | SD   |
| Thyroid gland    | 1.51 | 1.58 |
| Adrenal gland    | 0.76 | 1.05 |

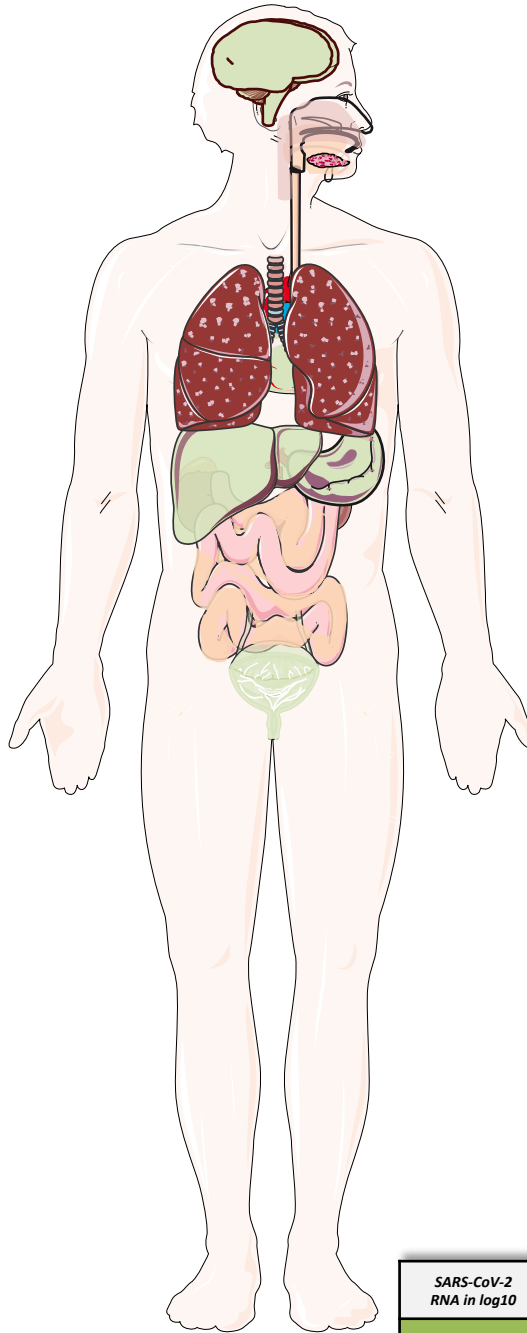

| Nervous system      |      |      |
|---------------------|------|------|
|                     | Mean | SD   |
| Brain, frontal lobe | 0.40 | 0.79 |
| Brain, hippocampus  | 0.39 | 0.68 |
| Cerebellum          | 0.37 | 0.82 |
| Brain stem, pons    | 0.69 | 1.31 |
| N. phrenicus        | 0.56 | 1.03 |

| Cardiovascular system |      |      |
|-----------------------|------|------|
|                       | Mean | SD   |
| Aortic arch           | 1.53 | 1.62 |
| Pulmonary artery      | 2.69 | 2.05 |
| Abdominal aorta, sr   | 1.22 | 1.27 |
| Heart, LV, aw, bp     | 0.86 | 1.03 |
| Heart, LV, aw, ap     | 0.77 | 0.88 |
| Heart, LV, pw, bp     | 0.53 | 0.60 |
| Heart, LV, pw, ap     | 0.74 | 0.85 |
| Heart, VS, bp         | 0.52 | 0.62 |
| Heart, VS, ap         | 0.81 | 0.83 |
| Heart, RV             | 0.56 | 0.73 |

| Reproductive system |      |      |
|---------------------|------|------|
|                     | Mean | SD   |
| Prostate            | 0.99 | 1.37 |
| Testicle            | 1.07 | 1.07 |
| Ovary               | bdl  | 0.00 |
| Uterus              | 1.20 | 1.10 |

| Hematological tissues |      |      |
|-----------------------|------|------|
|                       | Mean | SD   |
| Blood                 | 0.69 | 1.38 |
| Bone marrow           | 0.98 | 1.28 |

| Urinary tract   |      |      |
|-----------------|------|------|
|                 | Mean | SD   |
| Right kidney    | 0.65 | 0.90 |
| Left kidney     | 1.09 | 1.51 |
| Urinary bladder | 0.87 | 1.13 |

| SARS-CoV-2 RNA in log10 |
|-------------------------|
| <i>bdl</i>              |
| 0.01 – 0.99             |
| 1.00 – 1.99             |
| 2.00 – 2.99             |
| 3.00 – 3.99             |
| from 4.00               |

# Figure 1b

### Respiratory system

|                      | Patient 1 | Patient 2 | Patient 3 | Patient 4 | Patient 5 | Patient 6 | Patient 7 | Patient 8 | Patient 9 | Patient 10 | Patient 11 |
|----------------------|-----------|-----------|-----------|-----------|-----------|-----------|-----------|-----------|-----------|------------|------------|
| Mesopharynx          | nd        | nd        | nd        | 2.85      | 3.02      | bdl       | bdl       | 3.00      | 4.45      | 3.15       | bdl        |
| Epiglottis           | 2.50      | 1.18      | 1.66      | 3.14      | 2.60      | bdl       | 2.82      | 2.10      | 4.45      | 3.05       | bdl        |
| Trachea middle       | 2.46      | 1.36      | 3.03      | 5.27      | 5.47      | bdl       | bdl       | 3.01      | 5.09      | 2.71       | 1.82       |
| Tracheal bifurcation | 3.01      | 1.13      | 3.28      | 4.82      | 4.98      | bdl       | bdl       | 3.79      | 4.46      | 2.52       | 1.33       |
| Right lung, UL       | 6.17      | bdl       | 4.97      | 4.65      | 7.63      | 2.90      | 3.15      | 4.91      | 4.52      | 2.14       | bdl        |
| Right lung, ML       | 6.82      | 0.88      | 6.08      | 4.64      | 7.61      | 2.17      | 3.06      | 5.40      | 4.26      | 3.01       | bdl        |
| Right lung, LL       | 6.14      | 3.56      | 4.25      | 4.62      | 7.71      | 1.64      | 3.90      | 4.46      | 4.55      | 3.40       | bdl        |
| Left lung, UL        | 6.29      | bdl       | 6.39      | 5.79      | 7.19      | 4.16      | 3.26      | 5.40      | 4.82      | 3.91       | bdl        |
| Left lung, LL        | 6.20      | 2.52      | 5.90      | 4.84      | 6.94      | 2.68      | 2.96      | 4.63      | 4.34      | 4.06       | bdl        |

### Lymphatic system

|                       | Patient 1 | Patient 2 | Patient 3 | Patient 4 | Patient 5 | Patient 6 | Patient 7 | Patient 8 | Patient 9 | Patient 10 | Patient 11 |
|-----------------------|-----------|-----------|-----------|-----------|-----------|-----------|-----------|-----------|-----------|------------|------------|
| Tonsilla palatina     | nd        | nd        | nd        | 4.16      | 2.45      | np        | bdl       | 0.81      | 4.03      | 2.64       | bdl        |
| Cervical lymph nodes  | 0.79      | 2.58      | 2.57      | 3.20      | 5.23      | 2.78      | 1.48      | 2.96      | 3.78      | 2.22       | bdl        |
| Hilar lymph nodes     | 4.48      | 2.05      | 3.47      | 3.28      | 5.10      | 3.86      | 1.28      | 3.30      | 4.35      | 2.59       | bdl        |
| Paraaort. lymph nodes | 1.17      | bdl       | 3.82      | 1.55      | 2.78      | np        | bdl       | 2.99      | 3.56      | bdl        | bdl        |
| Spleen                | 1.68      | bdl       | 0.61      | 1.01      | 2.62      | bdl       | bdl       | bdl       | 2.02      | bdl        | bdl        |
| Appendix vermiformis  | 1.03      | bdl       | 2.93      | 2.23      | 1.73      | bdl       | bdl       | bdl       | bdl       | bdl        | bdl        |

### Cardiovascular system

|                     | Patient 1 | Patient 2 | Patient 3 | Patient 4 | Patient 5 | Patient 6 | Patient 7 | Patient 8 | Patient 9 | Patient 10 | Patient 11 |
|---------------------|-----------|-----------|-----------|-----------|-----------|-----------|-----------|-----------|-----------|------------|------------|
| Aortic arch         | 2.41      | bdl       | 3.00      | 3.51      | 3.55      | bdl       | bdl       | 0.99      | 3.32      | bdl        | bdl        |
| Pulmonary artery    | nd        | nd        | nd        | 3.47      | 5.73      | 1.68      | bdl       | 3.67      | 4.43      | 2.52       | bdl        |
| Abdominal aorta, sr | 1.47      | bdl       | 0.00      | 1.77      | 3.05      | bdl       | bdl       | 0.80      | 3.50      | 2.15       | 0.73       |
| Heart, LV, aw, pb   | 2.49      | bdl       | 0.86      | 0.66      | 2.00      | bdl       | bdl       | 0.83      | 2.58      | bdl        | bdl        |
| Heart, LV, aw, ap   | 2.10      | bdl       | 0.46      | 0.00      | 1.94      | bdl       | bdl       | 0.77      | 1.37      | 1.82       | bdl        |
| Heart, LV, pw, bp   | 1.73      | bdl       | 0.84      | 0.46      | 1.24      | bdl       | bdl       | 0.83      | 0.77      | bdl        | bdl        |
| Heart, LV, pw, ap   | 1.60      | bdl       | 1.02      | 0.67      | 2.58      | bdl       | bdl       | 1.11      | 1.11      | bdl        | bdl        |
| Heart, VS, bp       | 0.96      | bdl       | 1.48      | 0.00      | 1.42      | bdl       | bdl       | 0.81      | 1.00      | bdl        | bdl        |
| Heart, VS, ap       | 0.91      | bdl       | 1.09      | 0.00      | 2.08      | bdl       | bdl       | 1.41      | 1.59      | 1.80       | bdl        |
| Heart, RV           | 0.93      | bdl       | 1.08      | 0.72      | 2.12      | bdl       | bdl       | 1.30      | bdl       | bdl        | bdl        |

### Hematological tissues

|             | Patient 1 | Patient 2 | Patient 3 | Patient 4 | Patient 5 | Patient 6 | Patient 7 | Patient 8 | Patient 9 | Patient 10 | Patient 11 |
|-------------|-----------|-----------|-----------|-----------|-----------|-----------|-----------|-----------|-----------|------------|------------|
| Blood       | bdl       | bdl       | 3.20      | 1.14      | 3.89      | bdl       | bdl       | bdl       | bdl       | bdl        | bdl        |
| Bone marrow | 0.92      | bdl       | 0.74      | 2.06      | 2.82      | bdl       | bdl       | 1.50      | 3.69      | bdl        | bdl        |

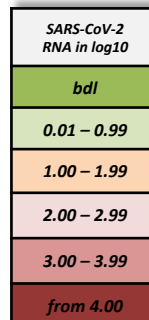

Figure 1c

### Gastrointestinal tract

|                     | Patient 1 | Patient 2 | Patient 3 | Patient 4 | Patient 5 | Patient 6 | Patient 7 | Patient 8 | Patient 9 | Patient 10 | Patient 11 |
|---------------------|-----------|-----------|-----------|-----------|-----------|-----------|-----------|-----------|-----------|------------|------------|
| Tongue              | nd        | nd        | nd        | 3.06      | 2.30      | bdl       | bdl       | 1.30      | 3.53      | 3.12       | bdl        |
| Gl. submandibularis | nd        | nd        | nd        | 1.24      | 1.56      | bdl       | bdl       | bdl       | 1.85      | 1.78       | 1.06       |
| Oesophagus          | nd        | nd        | nd        | 2.01      | 2.82      | bdl       | bdl       | 1.59      | 4.04      | 2.51       | bdl        |
| Stomach, corpus     | 1.57      | bdl       | 0.81      | bdl       | 1.39      | bdl       | bdl       | bdl       | 6.24      | bdl        | bdl        |
| Duodenum            | 2.13      | bdl       | 1.29      | 1.39      | bdl       | bdl       | bdl       | bdl       | 4.92      | bdl        | bdl        |
| Jejunum             | 0.89      | bdl       | 2.25      | 2.22      | 1.25      | bdl       | bdl       | bdl       | 4.43      | bdl        | bdl        |
| Pancreas            | bdl       | bdl       | bdl       | bdl       | bdl       | bdl       | bdl       | bdl       | 1.84      | bdl        | 0.83       |
| Liver               | bdl       | bdl       | 1.90      | 1.19      | 2.29      | bdl       | bdl       | 0.70      | bdl       | 2.31       | bdl        |
| Gall bladder        | bdl       | bdl       | 2.14      | bdl       | bdl       | bdl       | bdl       | bdl       | 0.79      | bdl        | 1.04       |
| Ileum               | bdl       | bdl       | 4.72      | 1.37      | 1.70      | bdl       | bdl       | bdl       | 4.76      | 2.20       | bdl        |
| Colon               | bdl       | bdl       | 4.80      | 0.74      | 1.32      | bdl       | bdl       | bdl       | 4.45      | bdl        | bdl        |
| Rectum              | bdl       | bdl       | 2.30      | bdl       | 1.92      | bdl       | bdl       | 0.84      | 2.35      | 2.01       | bdl        |

### Endocrine system

|               | Patient 1 | Patient 2 | Patient 3 | Patient 4 | Patient 5 | Patient 6 | Patient 7 | Patient 8 | Patient 9 | Patient 10 | Patient 11 |
|---------------|-----------|-----------|-----------|-----------|-----------|-----------|-----------|-----------|-----------|------------|------------|
| Thyroid gland | bdl       | bdl       | 2.76      | 2.38      | 3.56      | bdl       | bdl       | 2.39      | 4.10      | 2.44       | bdl        |
| Adrenal gland | bdl       | bdl       | bdl       | 2.16      | 2.17      | bdl       | bdl       | 0.57      | 2.58      | 1.62       | bdl        |

### Urinary tract

|                 | Patient 1 | Patient 2 | Patient 3 | Patient 4 | Patient 5 | Patient 6 | Patient 7 | Patient 8 | Patient 9 | Patient 10 | Patient 11 |
|-----------------|-----------|-----------|-----------|-----------|-----------|-----------|-----------|-----------|-----------|------------|------------|
| Right kidney    | bdl       | bdl       | 0.61      | 1.18      | 2.32      | bdl       | bdl       | 0.84      | 2.22      | bdl        | bdl        |
| Left kidney     | bdl       | bdl       | 1.58      | 1.11      | 4.42      | bdl       | bdl       | bdl       | 2.95      | 1.98       | bdl        |
| Urinary bladder | 0.96      | bdl       | 1.30      | 0.97      | 1.90      | bdl       | bdl       | bdl       | 3.65      | bdl        | 0.81       |

### Nervous system

|                     | Patient 1 | Patient 2 | Patient 3 | Patient 4 | Patient 5 | Patient 6 | Patient 7 | Patient 8 | Patient 9 | Patient 10 | Patient 11 |
|---------------------|-----------|-----------|-----------|-----------|-----------|-----------|-----------|-----------|-----------|------------|------------|
| Brain, frontal lobe | bdl       | bdl       | 2.15      | 0.47      | 1.77      | bdl       | bdl       | bdl       | bdl       | bdl        | bdl        |
| Brain, hippocampus  | bdl       | bdl       | 1.65      | 1.26      | 1.41      | bdl       | bdl       | bdl       | bdl       | bdl        | bdl        |
| Cerebellum          | bdl       | bdl       | 0.00      | 2.06      | 2.01      | bdl       | bdl       | bdl       | bdl       | bdl        | bdl        |
| Brain stem, pons    | bdl       | bdl       | 3.96      | 2.05      | 1.60      | bdl       | bdl       | bdl       | bdl       | bdl        | bdl        |
| N. phrenicus        | nd        | nd        | nd        | nd        | nd        | bdl       | bdl       | 0.82      | 2,56      | bdl        | bdl        |

### Reproductive system

|          | Patient 1 | Patient 2 | Patient 3 | Patient 4 | Patient 5 | Patient 6 | Patient 7 | Patient 8 | Patient 9 | Patient 10 | Patient 11 |
|----------|-----------|-----------|-----------|-----------|-----------|-----------|-----------|-----------|-----------|------------|------------|
| Prostate | bdl       | bdl       | 3.49      | 1.86      | 1.58      | bdl       | bdl       | np        | np        | np         | np         |
| Testicle | 1.56      | bdl       | 1.31      | 2.27      | 2.37      | bdl       | bdl       | np        | np        | np         | np         |
| Ovary    | np        | np        | np        | np        | np        | np        | np        | bdl       | bdl       | bdl        | bdl        |
| Uterus   | np        | np        | np        | np        | np        | np        | np        | bdl       | 2.46      | 1.70       | 0.63       |

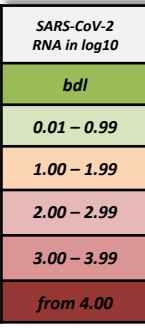

# Figure 2

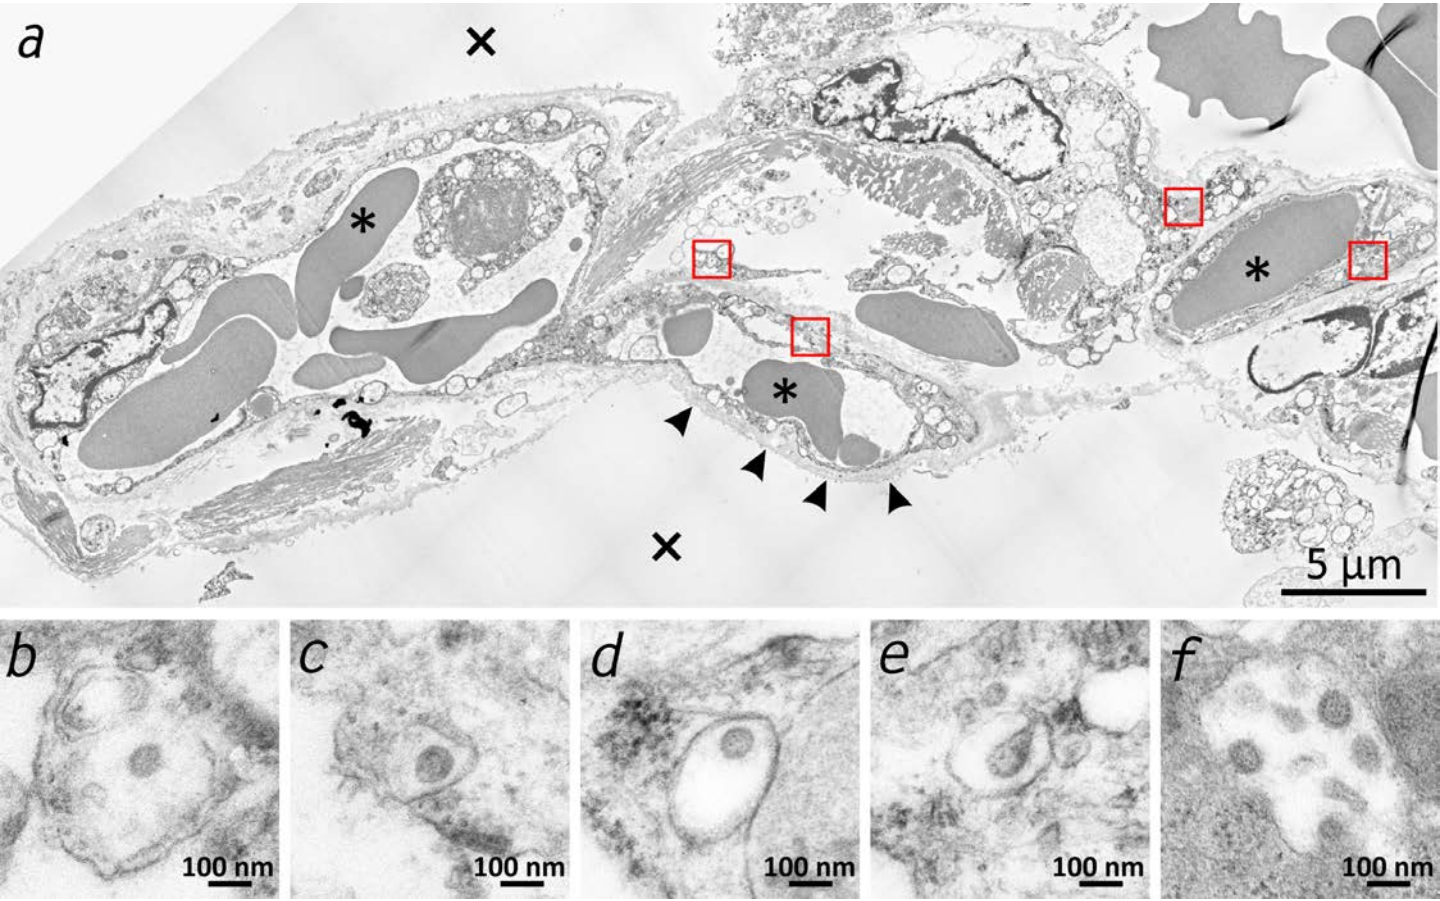

# Figure 3

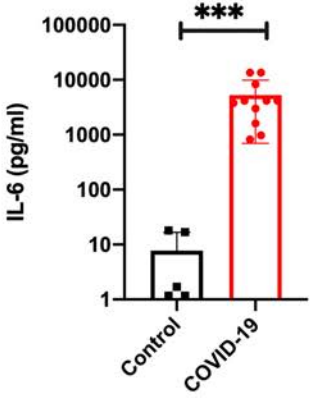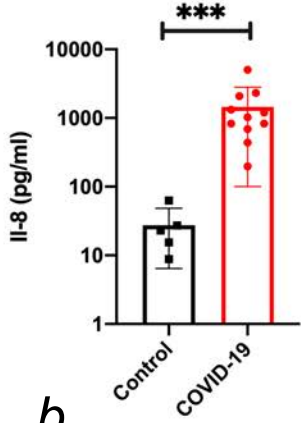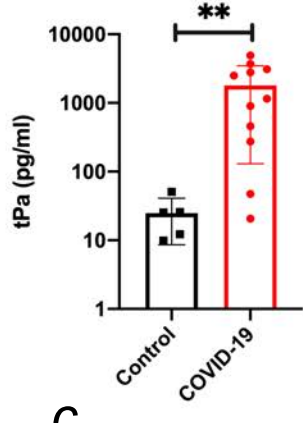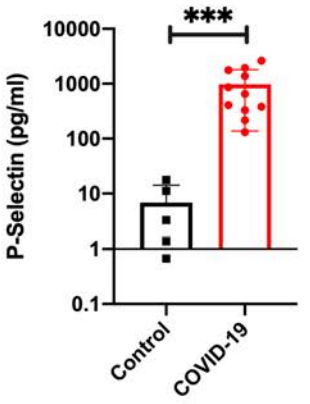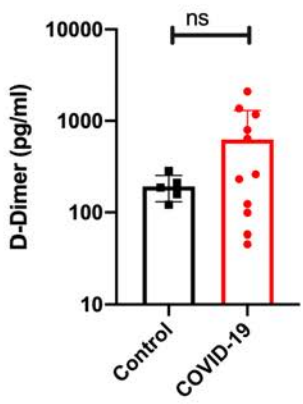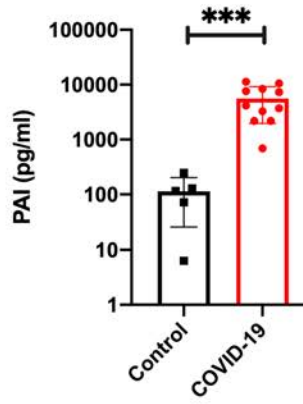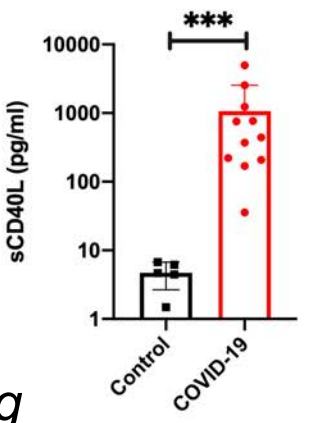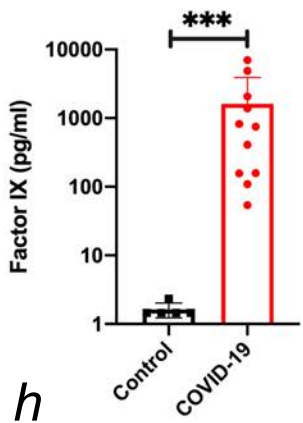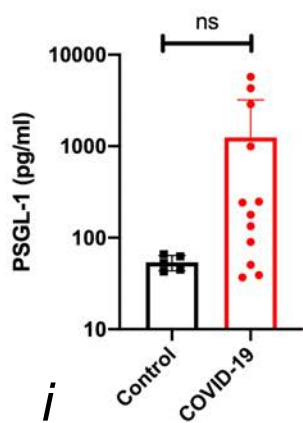

Figure 4

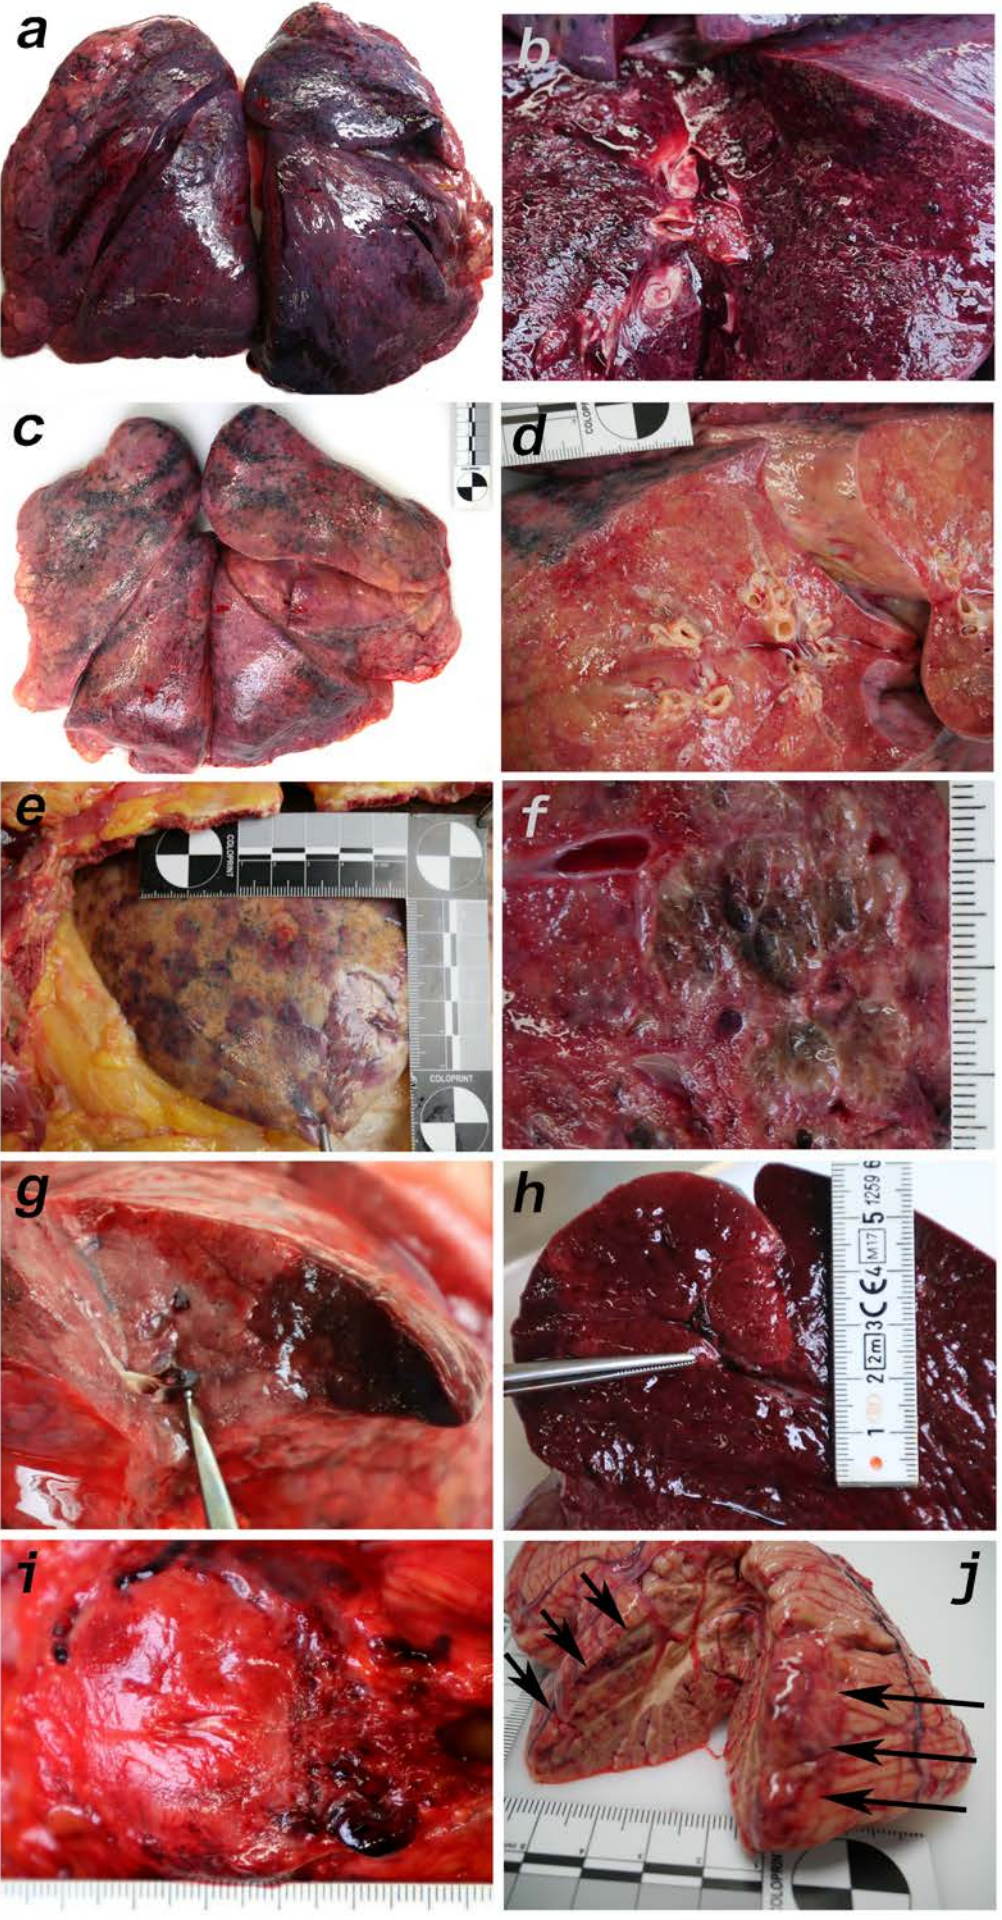

Figure 5

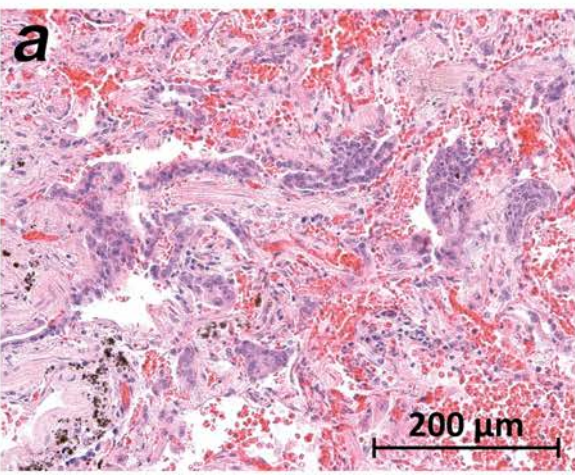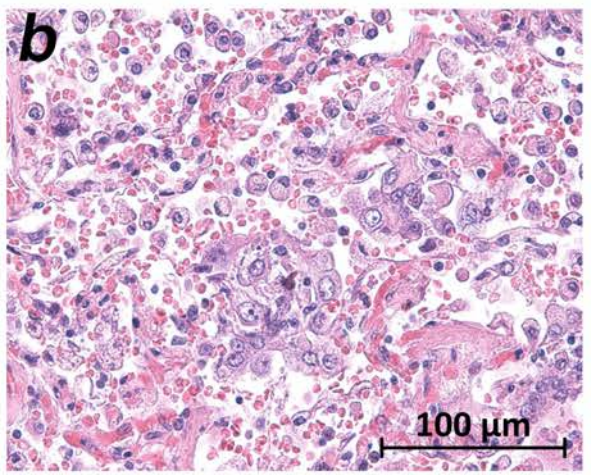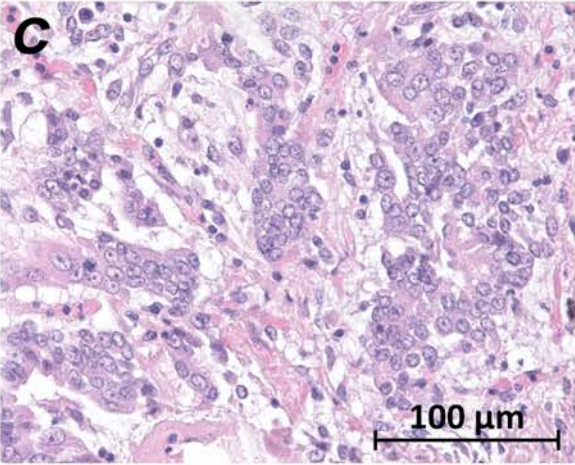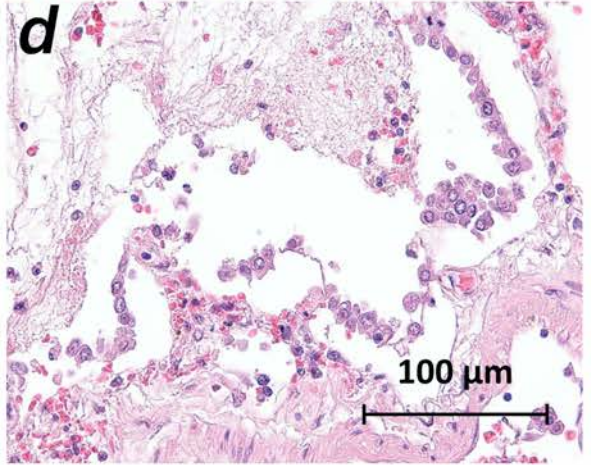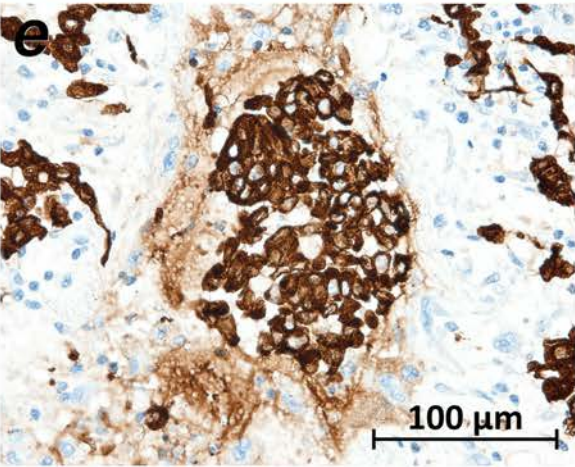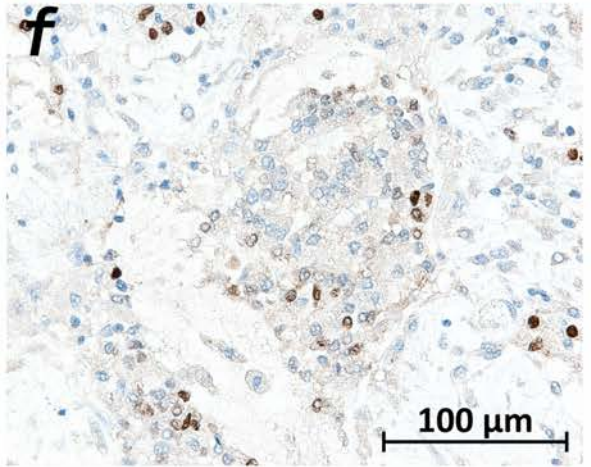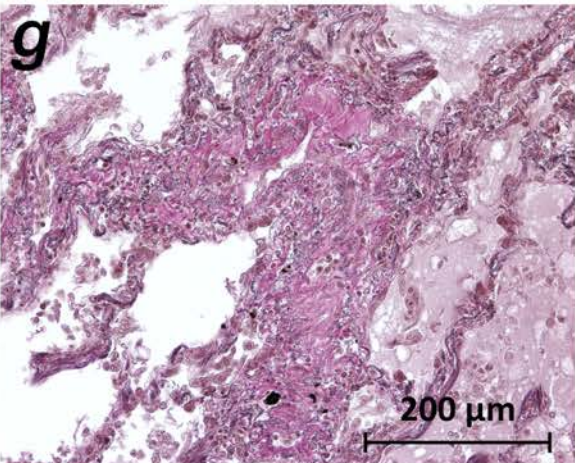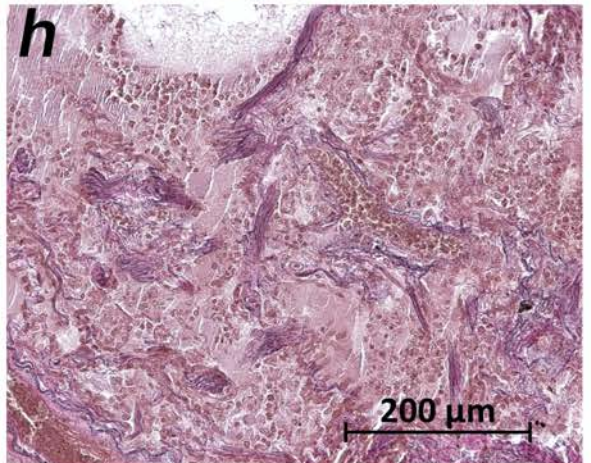



Figure 6

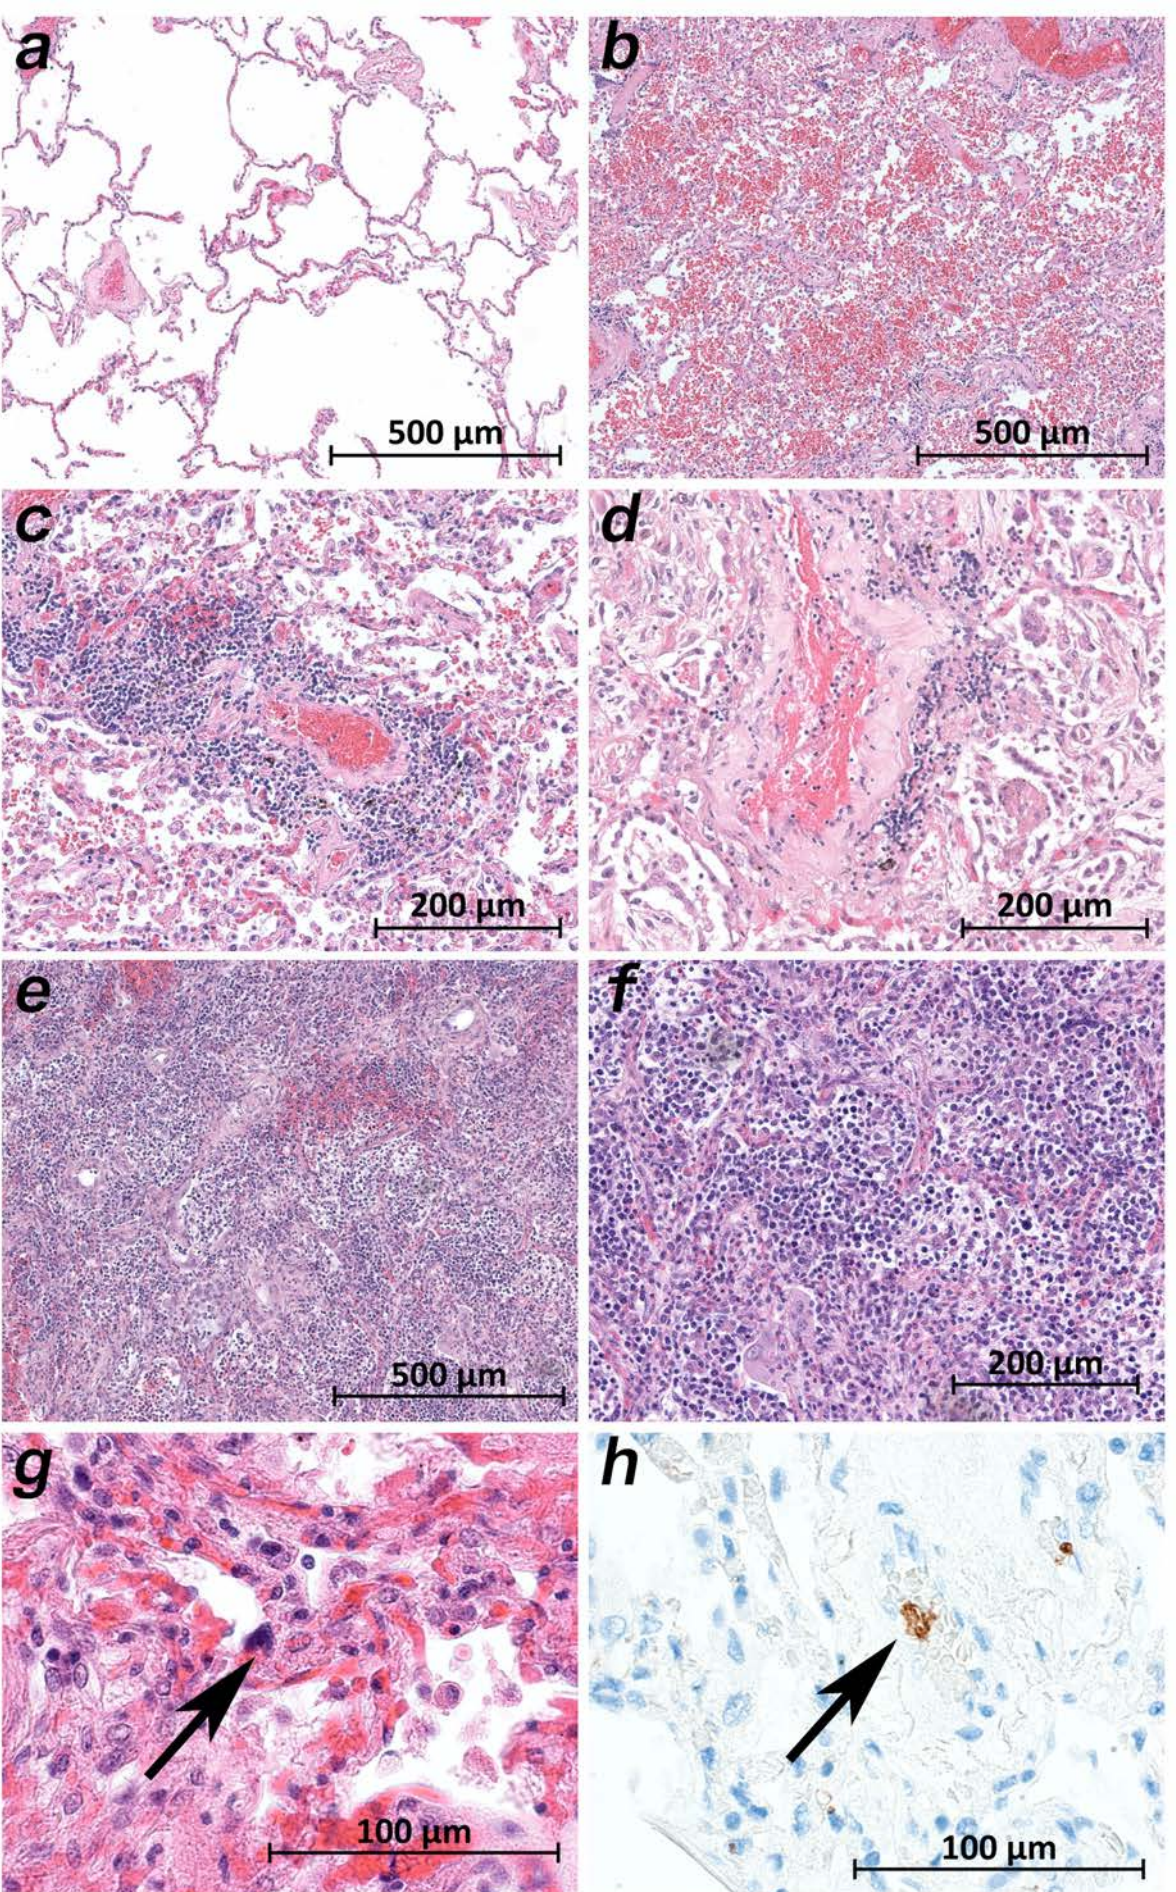

Figure 7

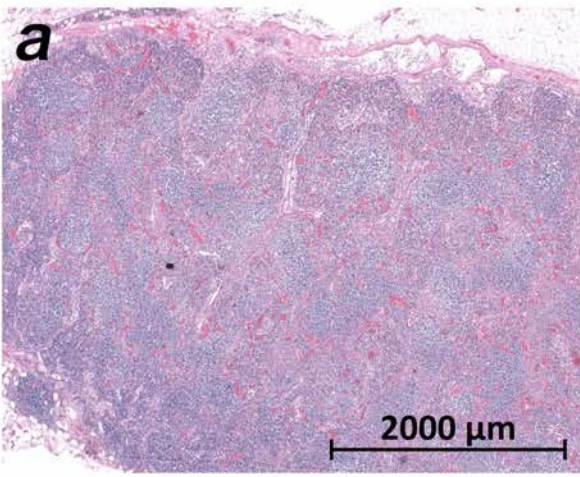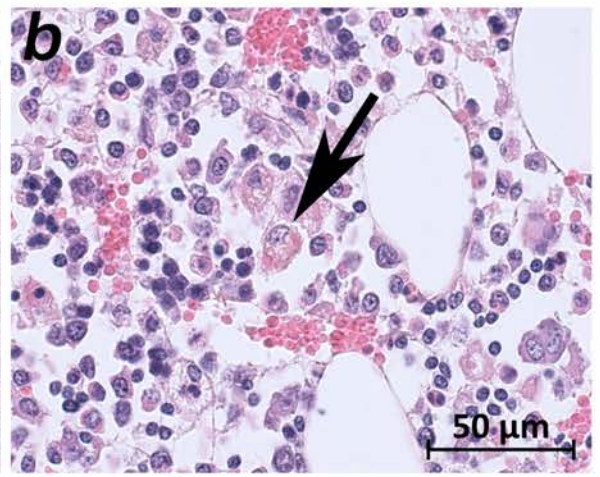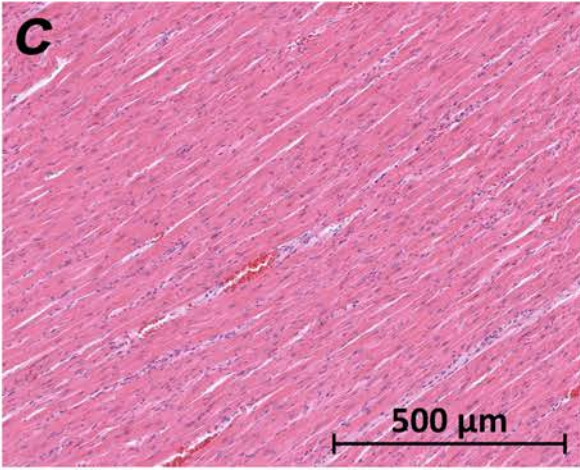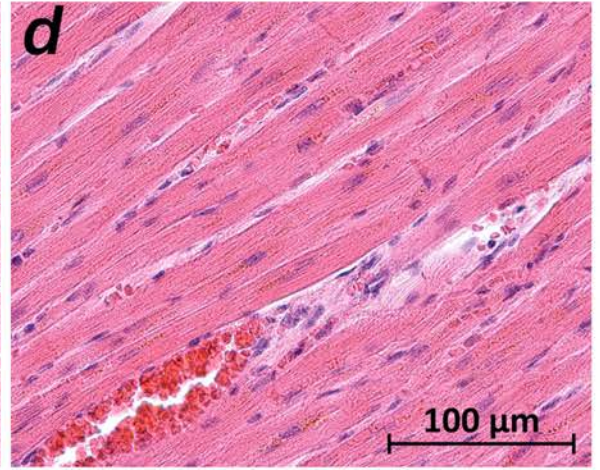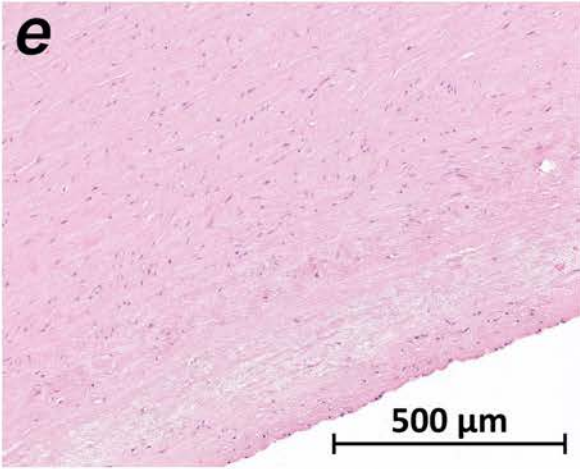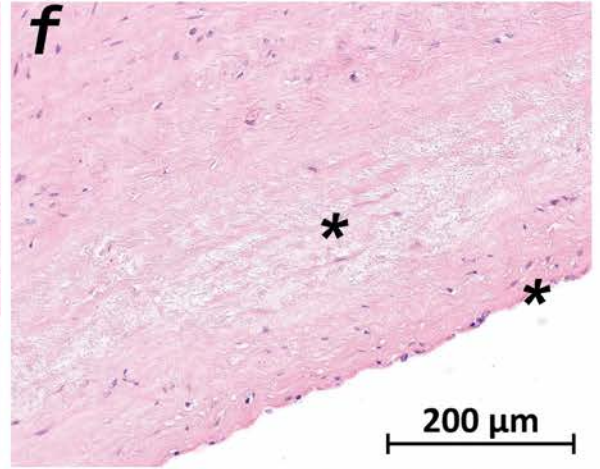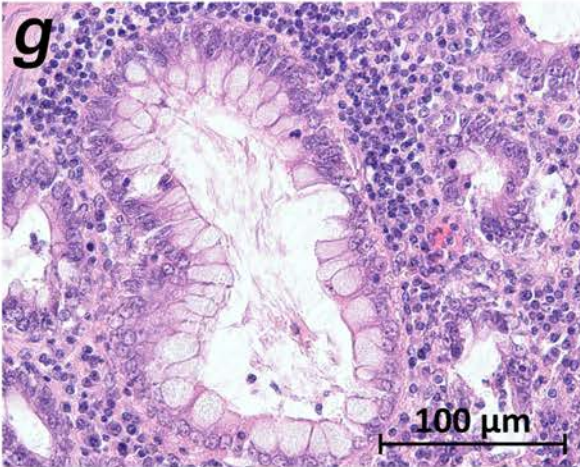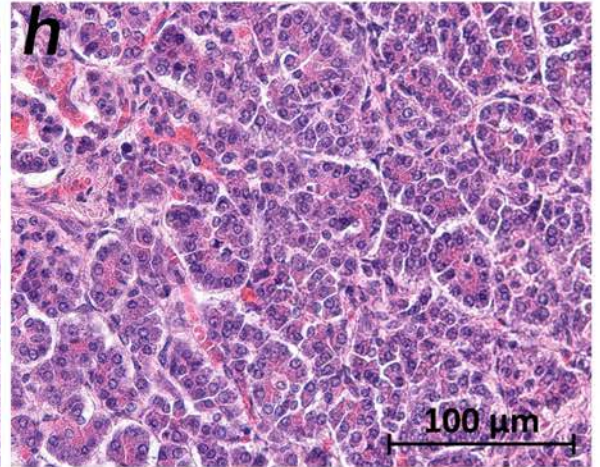

# **Early postmortem mapping of SARS-CoV-2 RNA in patients with COVID-19 and correlation to tissue damage**

Tables

Table 1

|                                        | patient 1                                           | patient 2            | patient 3                                            | patient 4    | patient 5                       | patient 6                   | patient 7            | patient 8                                                              | patient 9                           | patient 10   | patient 11         |
|----------------------------------------|-----------------------------------------------------|----------------------|------------------------------------------------------|--------------|---------------------------------|-----------------------------|----------------------|------------------------------------------------------------------------|-------------------------------------|--------------|--------------------|
| <b>sex</b>                             | m                                                   | m                    | m                                                    | m            | m                               | m                           | m                    | f                                                                      | f                                   | f            | f                  |
| <b>age [years]</b>                     | 82                                                  | 66                   | 78                                                   | 54           | 80                              | 64                          | 64                   | 87                                                                     | 83                                  | 85           | 52                 |
| <b>BMI [kg/m<sup>2</sup>]</b>          | 23.8                                                | 31.5                 | 25.2                                                 | 28.3         | 28.8                            | 35.4                        | 24.6                 | 24.6                                                                   | 28.9                                | 26.2         | 21.4               |
| <b>pre-existing medical conditions</b> | AF, DM, autoimmune pancreatitis, purpura pigmentosa | aHT                  | aHT, DM, CRF, PAD, urosepsis shortly before COVID-19 | none known   | DM, CRF, CHF                    | GPA, CRF, COPD, aHT, AF, DM | AS, COPD             | CHF, CRF, DM, past stroke epilepsy, erysipelas shortly before COVID-19 | aHT, DM, CRF, 1-vessel-CHD, AF, PAD | CHF, CRF, DM | cervical carcinoma |
| <b>hospitalization [d]</b>             | 7                                                   | 5                    | 30                                                   | 10           | 9                               | 20                          | 15                   | 12                                                                     | 7                                   | 9            | 4                  |
| <b>ICU [d]</b>                         | 7                                                   | 5                    | 7                                                    | 8            | 8                               | 17                          | 9                    | 0                                                                      | 0                                   | 0            | 4                  |
| <b>mechanical ventilation [d]</b>      | 7                                                   | 4                    | 7                                                    | 7            | 8                               | 16                          | 9 (ECMO)             | 0                                                                      | 0                                   | 0            | 0                  |
| <b>virustatic medication</b>           | lopinavir, ritonavir                                | lopinavir, ritonavir | none                                                 | none         | none                            | lopinavir, ritonavir        | lopinavir, ritonavir | none                                                                   | none                                | none         | none               |
| <b>cause of death (acc. to clinic)</b> | MOF                                                 | pulmonary embolism   | MOF                                                  | lung failure | suspected myocardial infarction | lung failure                | lung failure         | respiratory failure                                                    | pneumonia                           | pneumonia    | ileus              |

**Table 1 Clinical characteristics of the patients.**

Abbreviations:

aHT – arterial hypertension

AF – atrial fibrillation

AS – atherosclerosis

CHF – chronic heart failure

CHD – coronary heart disease

COPD – chronic obstructive pulmonary disease

CRF – chronic renal failure

DM – diabetes mellitus

f – female

GPA – granulomatosis with polyangiitis (Wegener's Granulomatosis)

ICU – intensive care unit

MOF – multiple organ failure

PAD – peripheral artery disease

|                                                                       | patient 1                         | patient 2                     | patient 3           | patient 4                   | patient 5                  | patient 6          | patient 7          | patient 8          | patient 9          | patient 10                    | patient 11                |         |
|-----------------------------------------------------------------------|-----------------------------------|-------------------------------|---------------------|-----------------------------|----------------------------|--------------------|--------------------|--------------------|--------------------|-------------------------------|---------------------------|---------|
| <b>PMI [h]</b>                                                        | 3.5                               | 2.25                          | 7.5                 | 9.5                         | 15.0                       | 2.33               | 1.5                | 5.8                | 5.0                | 6.0                           | 3.5                       |         |
| <b>lung weight</b>                                                    | R 1550 g<br>L 1240 g              | R 940 g<br>L 760 g            | R 1170 g<br>L 790 g | R 1860 g<br>L 1640 g        | R 1370 g<br>L 990 g        | R 970 g<br>L 570 g | R 890 g<br>L 770 g | R 610 g<br>L 480 g | R 550 g<br>L 680 g | R 530 g<br>L 400 g            | R 760 g<br>L 590 g        |         |
| <b>lung macro*</b>                                                    | <b>edema</b>                      | +++                           | ++                  | ++                          | ++                         | ++                 | +                  | +                  | +                  | +                             | ++                        | +       |
|                                                                       | <b>hypermia</b>                   | +++                           | +                   | +++                         | ++                         | ++                 | +                  | +                  | +                  | +                             | ++                        | +       |
|                                                                       | <b>hemorrhage</b>                 | +++                           | +                   | +++                         | ++                         | ++                 | ++                 | +                  | -                  | +                             | ++                        | +       |
|                                                                       | <b>texture</b>                    | reduced                       | reduced             | reduced                     | reduced                    | reduced            | enhanced           | enhanced           | enhanced           | reduced                       | reduced                   | reduced |
|                                                                       | <b>infarction</b>                 | -                             | -                   | +                           | +                          | -                  | -                  | -                  | -                  | -                             | -                         | -       |
| <b>lung micro*</b>                                                    | <b>DAD, exsudative phase</b>      | +++                           | ++                  | ++                          | ++                         | +++                | +                  | +                  | +                  | +                             | ++                        | +       |
|                                                                       | <b>DAD, proliferative phase</b>   | ++                            | -                   | -                           | +                          | +                  | +++                | +++                | +++                | ++                            | ++                        | -       |
|                                                                       | <b>multinucleated giant cells</b> | +++                           | ++                  | ++                          | ++                         | ++                 | +                  | +                  | -                  | ++                            | +                         | +       |
|                                                                       | <b>squamous metaplasia</b>        | +++                           | +                   | ++                          | ++                         | ++                 | +                  | ++                 | ++                 | ++                            | +++                       | +       |
|                                                                       | <b>megakaryocytes</b>             | -                             | -                   | -                           | -                          | -                  | +                  | +                  | ++                 | +                             | -                         | +       |
|                                                                       | <b>lymphocytic infiltrates</b>    | +                             | +                   | -                           | -                          | ++                 | -                  | +++                | -                  | -                             | +                         | -       |
|                                                                       | <b>vasculitis</b>                 | -                             | +                   | +                           | +                          | -                  | -                  | -                  | +                  | +                             | -                         | -       |
|                                                                       | <b>stasis / fibrin thrombi</b>    | +                             | +                   | -                           | -                          | -                  | -                  | -                  | +                  | +                             | +                         | tumor   |
|                                                                       | <b>emboli</b>                     | -                             | ++                  | -                           | +                          | +                  | -                  | -                  | -                  | -                             | +                         | tumor   |
|                                                                       | <b>superinfection</b>             | -                             | -                   | fungal                      | -                          | -                  | bacterial          | -                  | -                  | bacterial                     | bacterial                 | -       |
| <b>heart weight</b>                                                   | 480 g                             | 600 g                         | 550 g               | 430 g                       | 810 g                      | 610 g              | 480 g              | 380 g              | 360 g              | 300 g                         | 350 g                     |         |
| <b>heart macro</b>                                                    | pericarditis,<br>2-v-CHD          | conc. HT                      | 3-v-CHD             | un-remarkable               | exc. HT                    | exc. HT            | -                  | 2-v-CHD            | 3-v-CHD            | 1-v-CHD                       | un-remarkable             |         |
| <b>heart micro</b>                                                    | moderate fibrosis                 | moderate fibrosis             | chronic ischemia    | un-remarkable               | amyloidosis                | slight fibrosis    | slight fibrosis    | slight fibrosis    | moderate fibrosis  | atrophy, fibrosis             | invasive metastases       |         |
| <b>further autopsy findings (besides age-related or pre-existing)</b> | steatosis hepatis                 | NASH                          | -                   | CLL, ICH, spleen infarction | severe cardiac amyloidosis | hepatic siderosis  | -                  | adrenal thrombosis | -                  | endometrial carcinoma (apT1a) | cervical carcinoma (apT4) |         |
| <b>cause of death (acc. to autopsy) **</b>                            | COVID-19 (HP)                     | COVID-19 (pulmonary embolism) | COVID-19 (HP)       | COVID-19 (HP)               | COVID-19 (HP)              | COVID-19 (CCP)     | COVID-19 (CCP)     | COVID-19 (CCP)     | COVID-19 (BP+HP)   | COVID-19 (BP+HP)              | malignant tumor disease   |         |

## **Table 2 Autopsy findings.**

### Abbreviations:

BP – bronchopneumonia

CCP – chronic organizing pneumonia

CHD – coronary heart disease

CLL – chronic lymphatic leukemia

DAD – diffuse alveolar damage

HP – hemorrhagic pneumonia

HT – hypertrophy, conc. = concentric, exc. = excentric

ICH – intracerebral hemorrhage

NASH – non-alcoholic steatosis hepatitis

PMI – postmortem interval (time between death and autopsy)

v – vessel

\* Semi-quantitative evaluation: no (-), few (+), moderate (++), very much (+++)

\*\* Supplemented term within brackets describes the dominant finding that caused death by COVID-19.

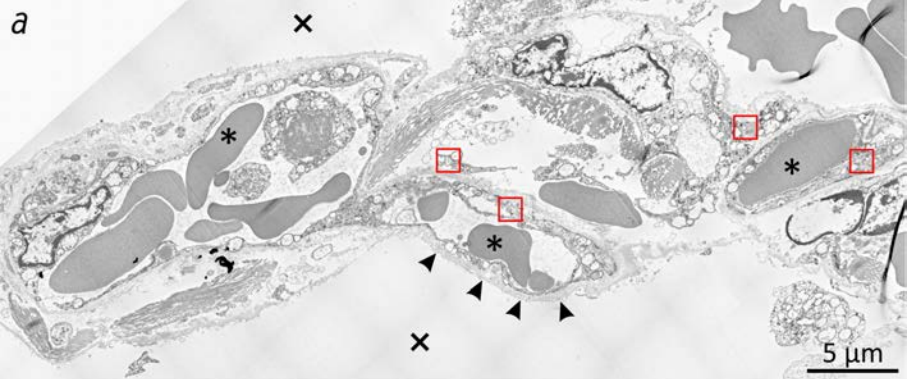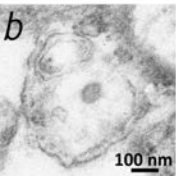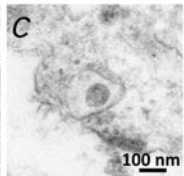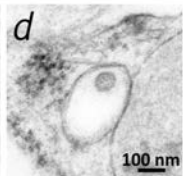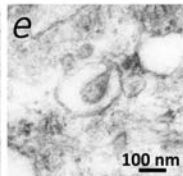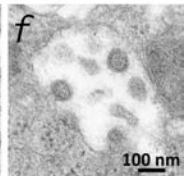



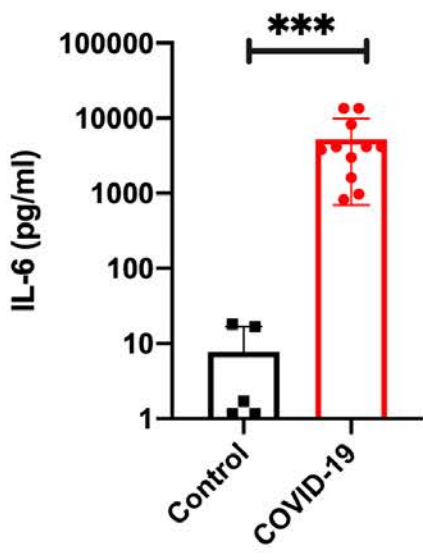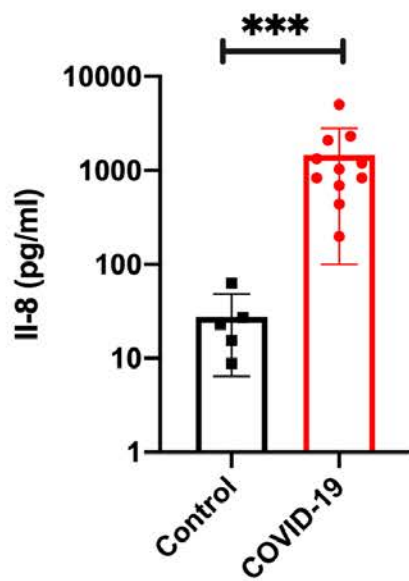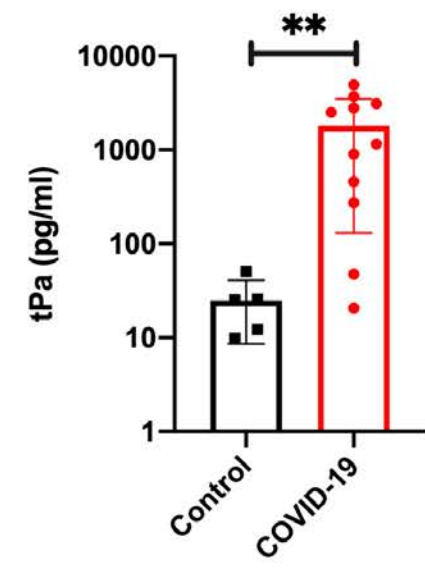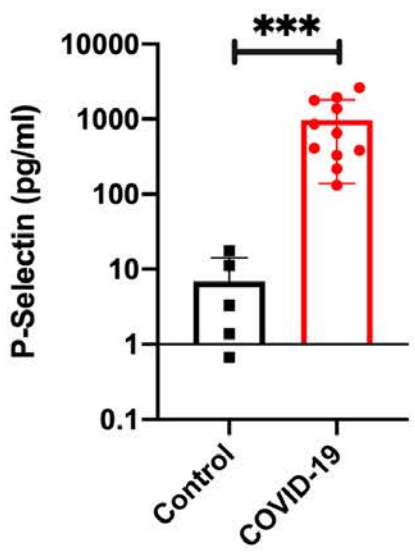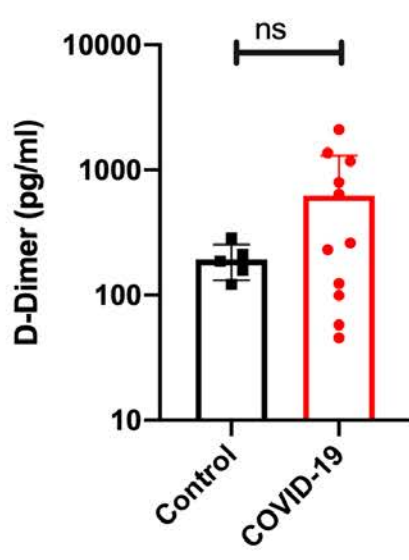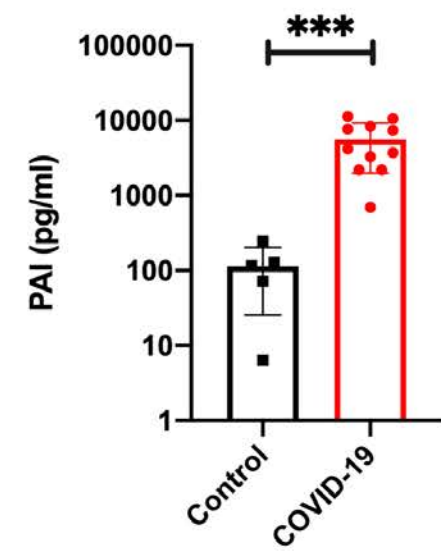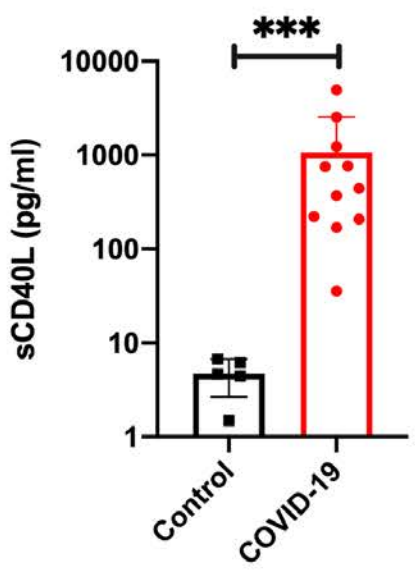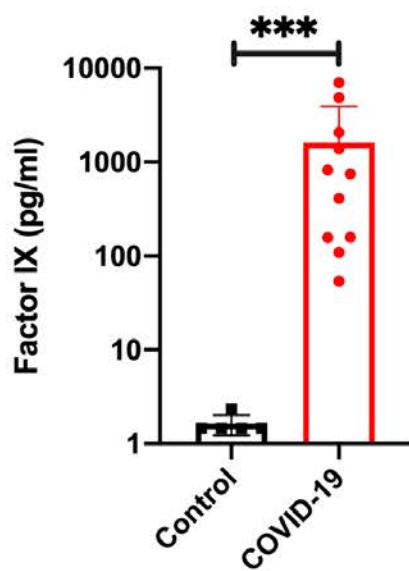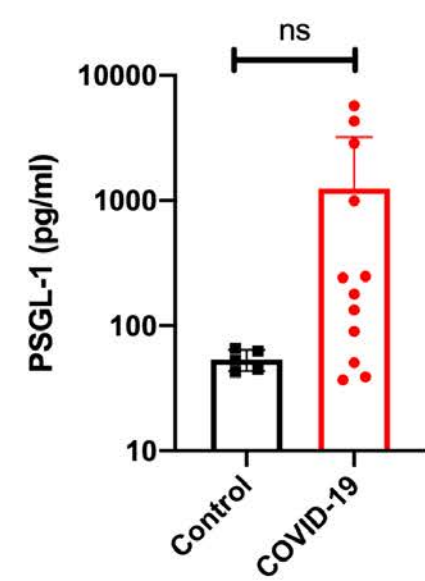

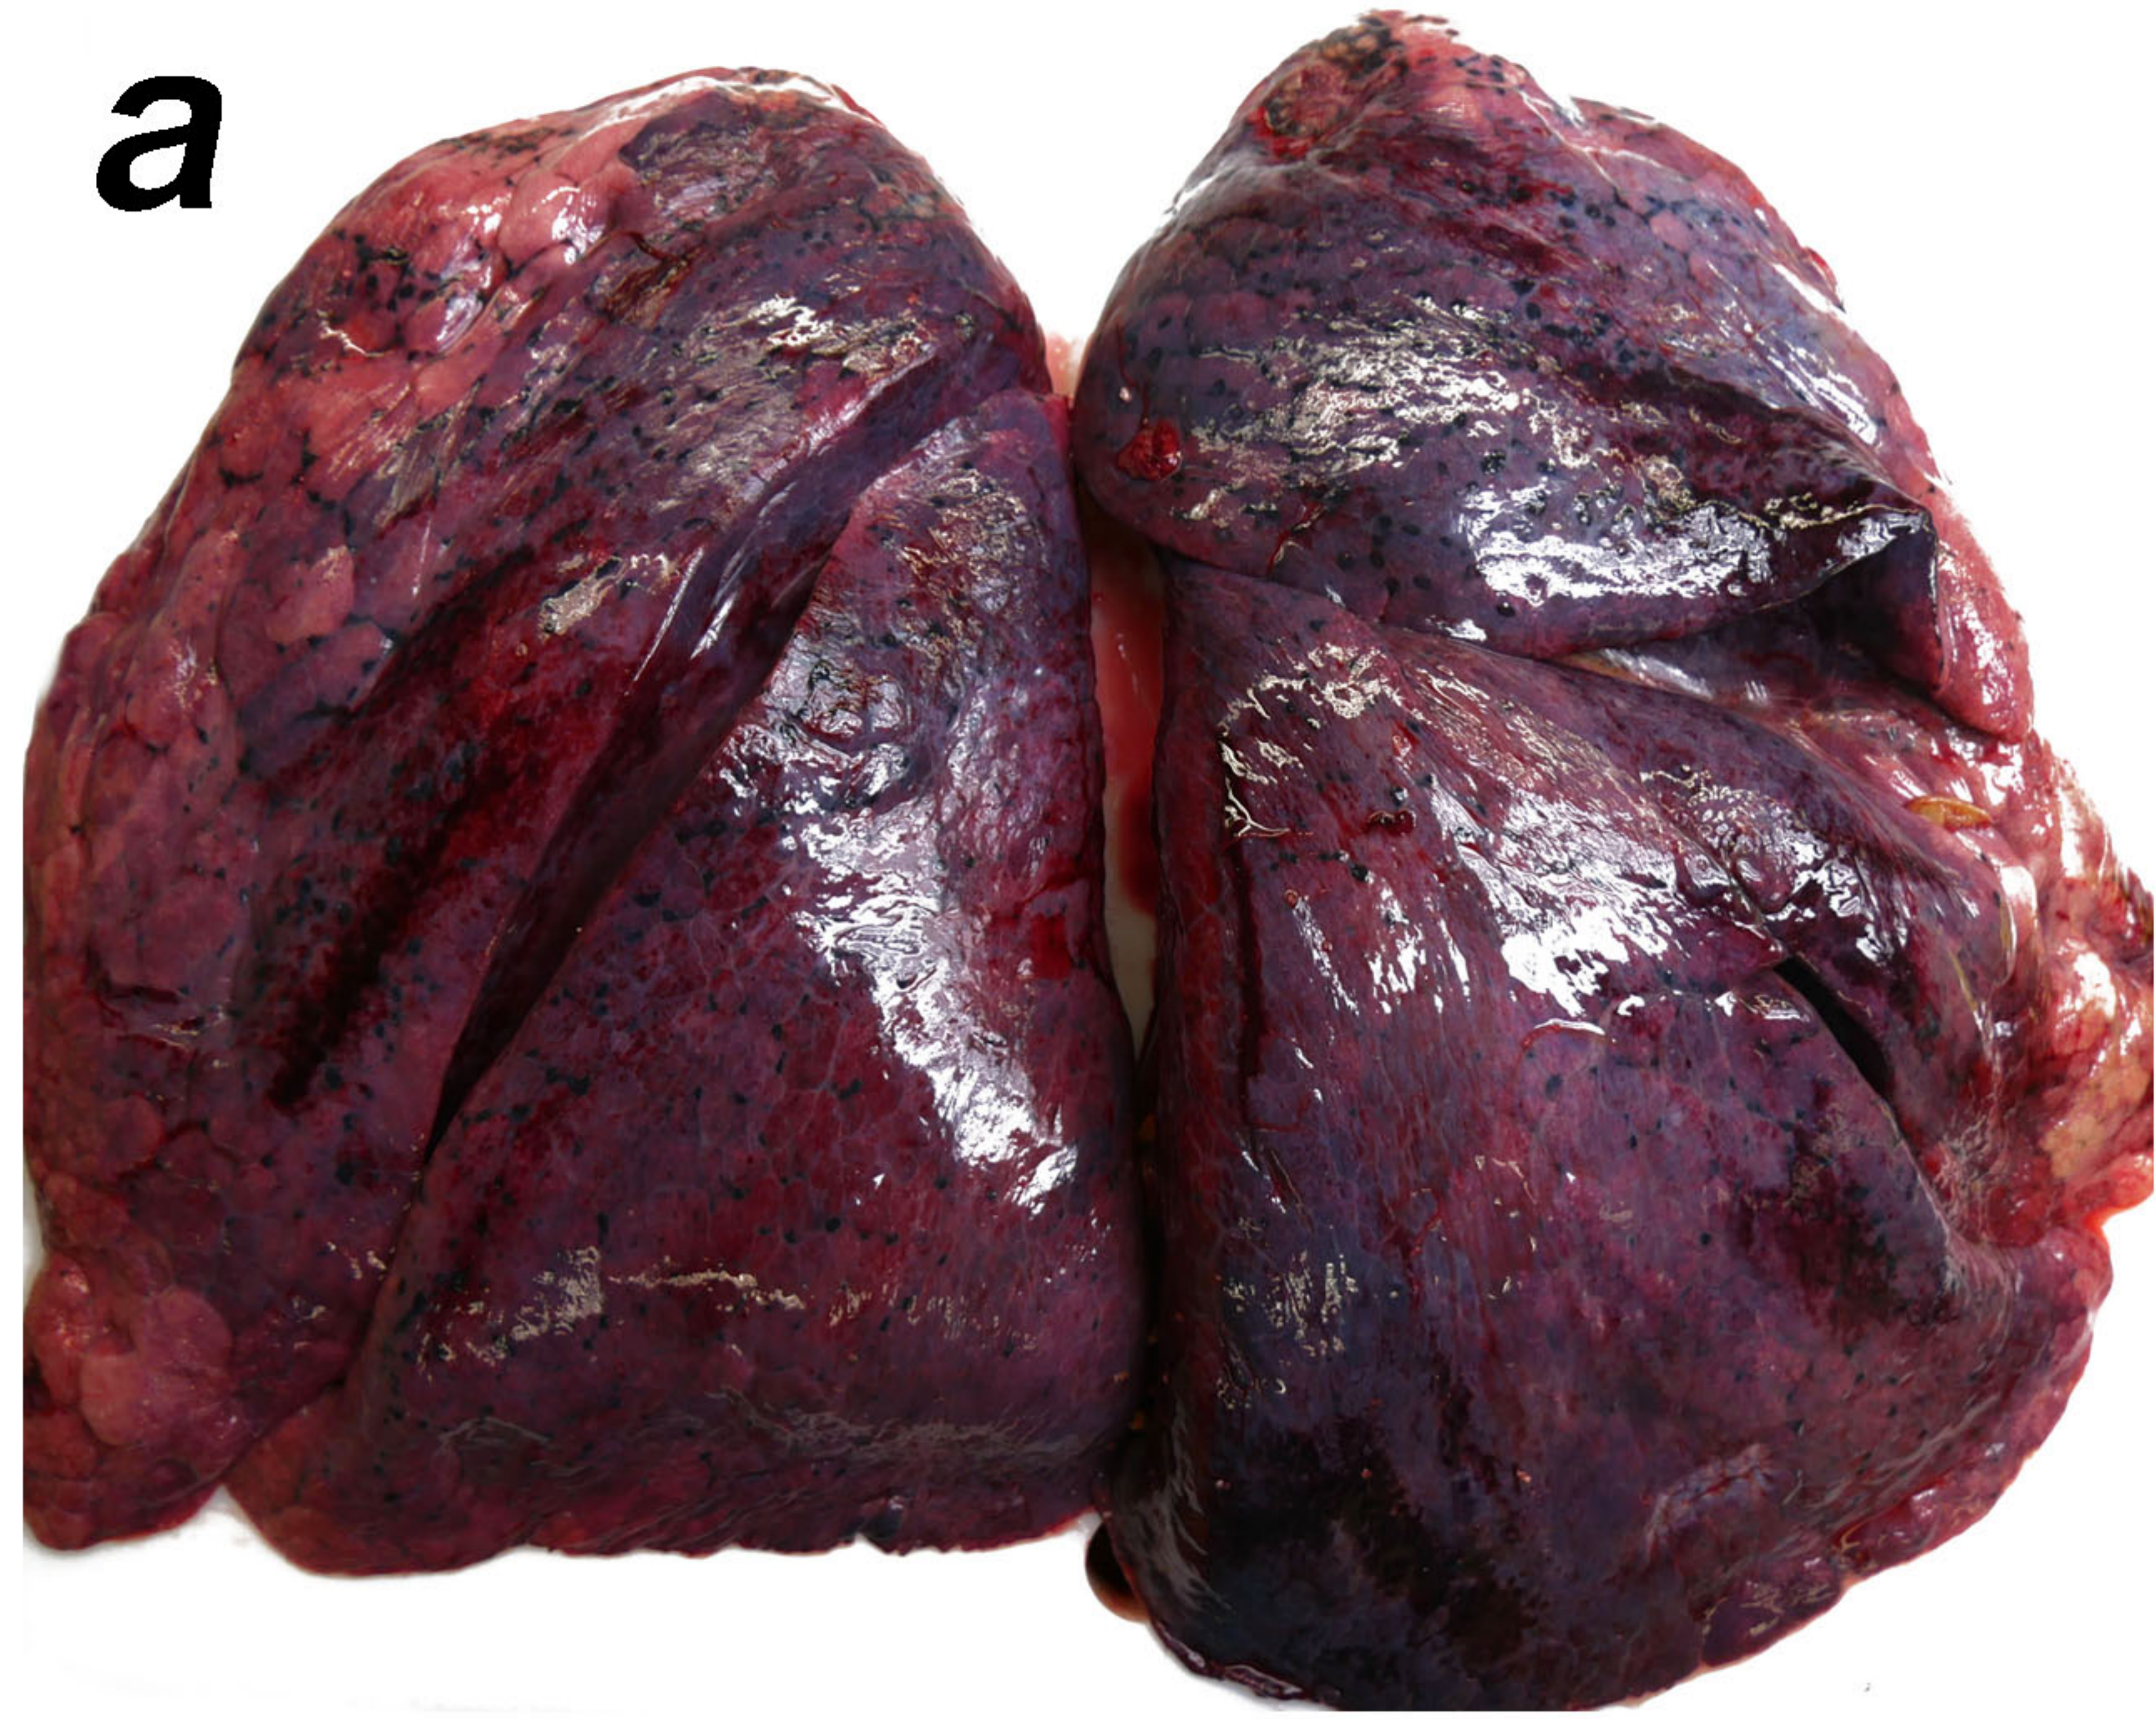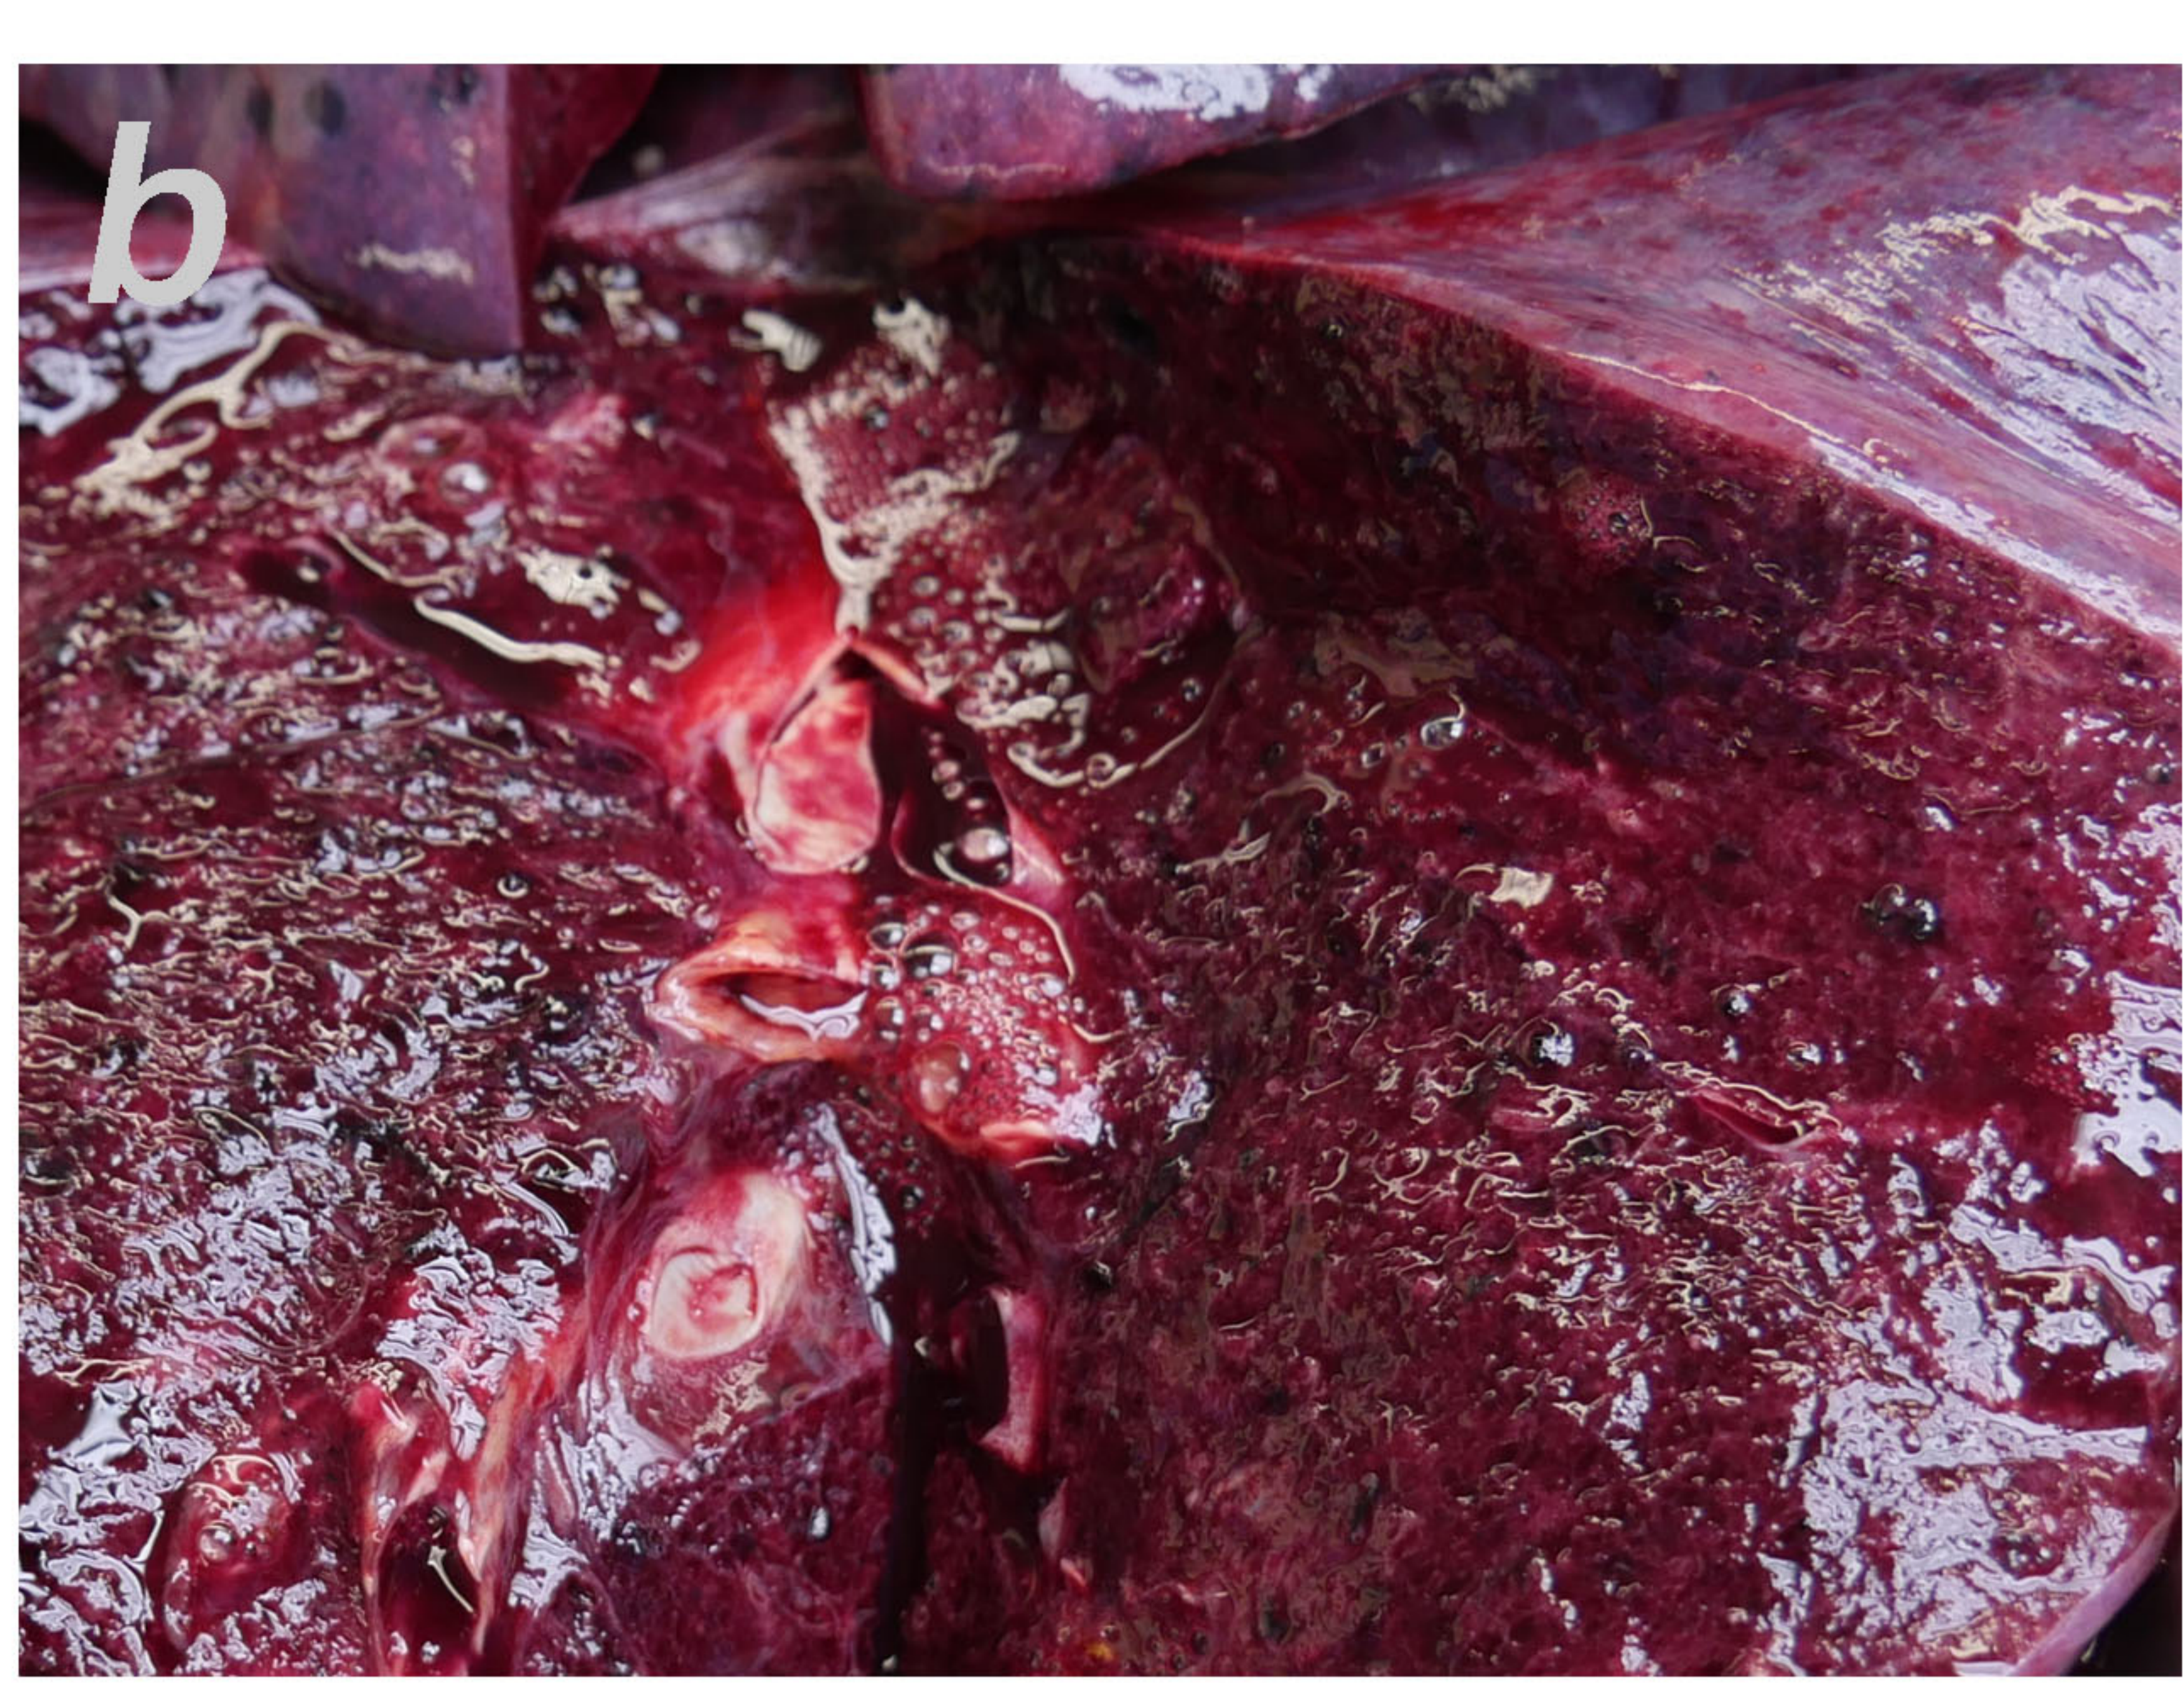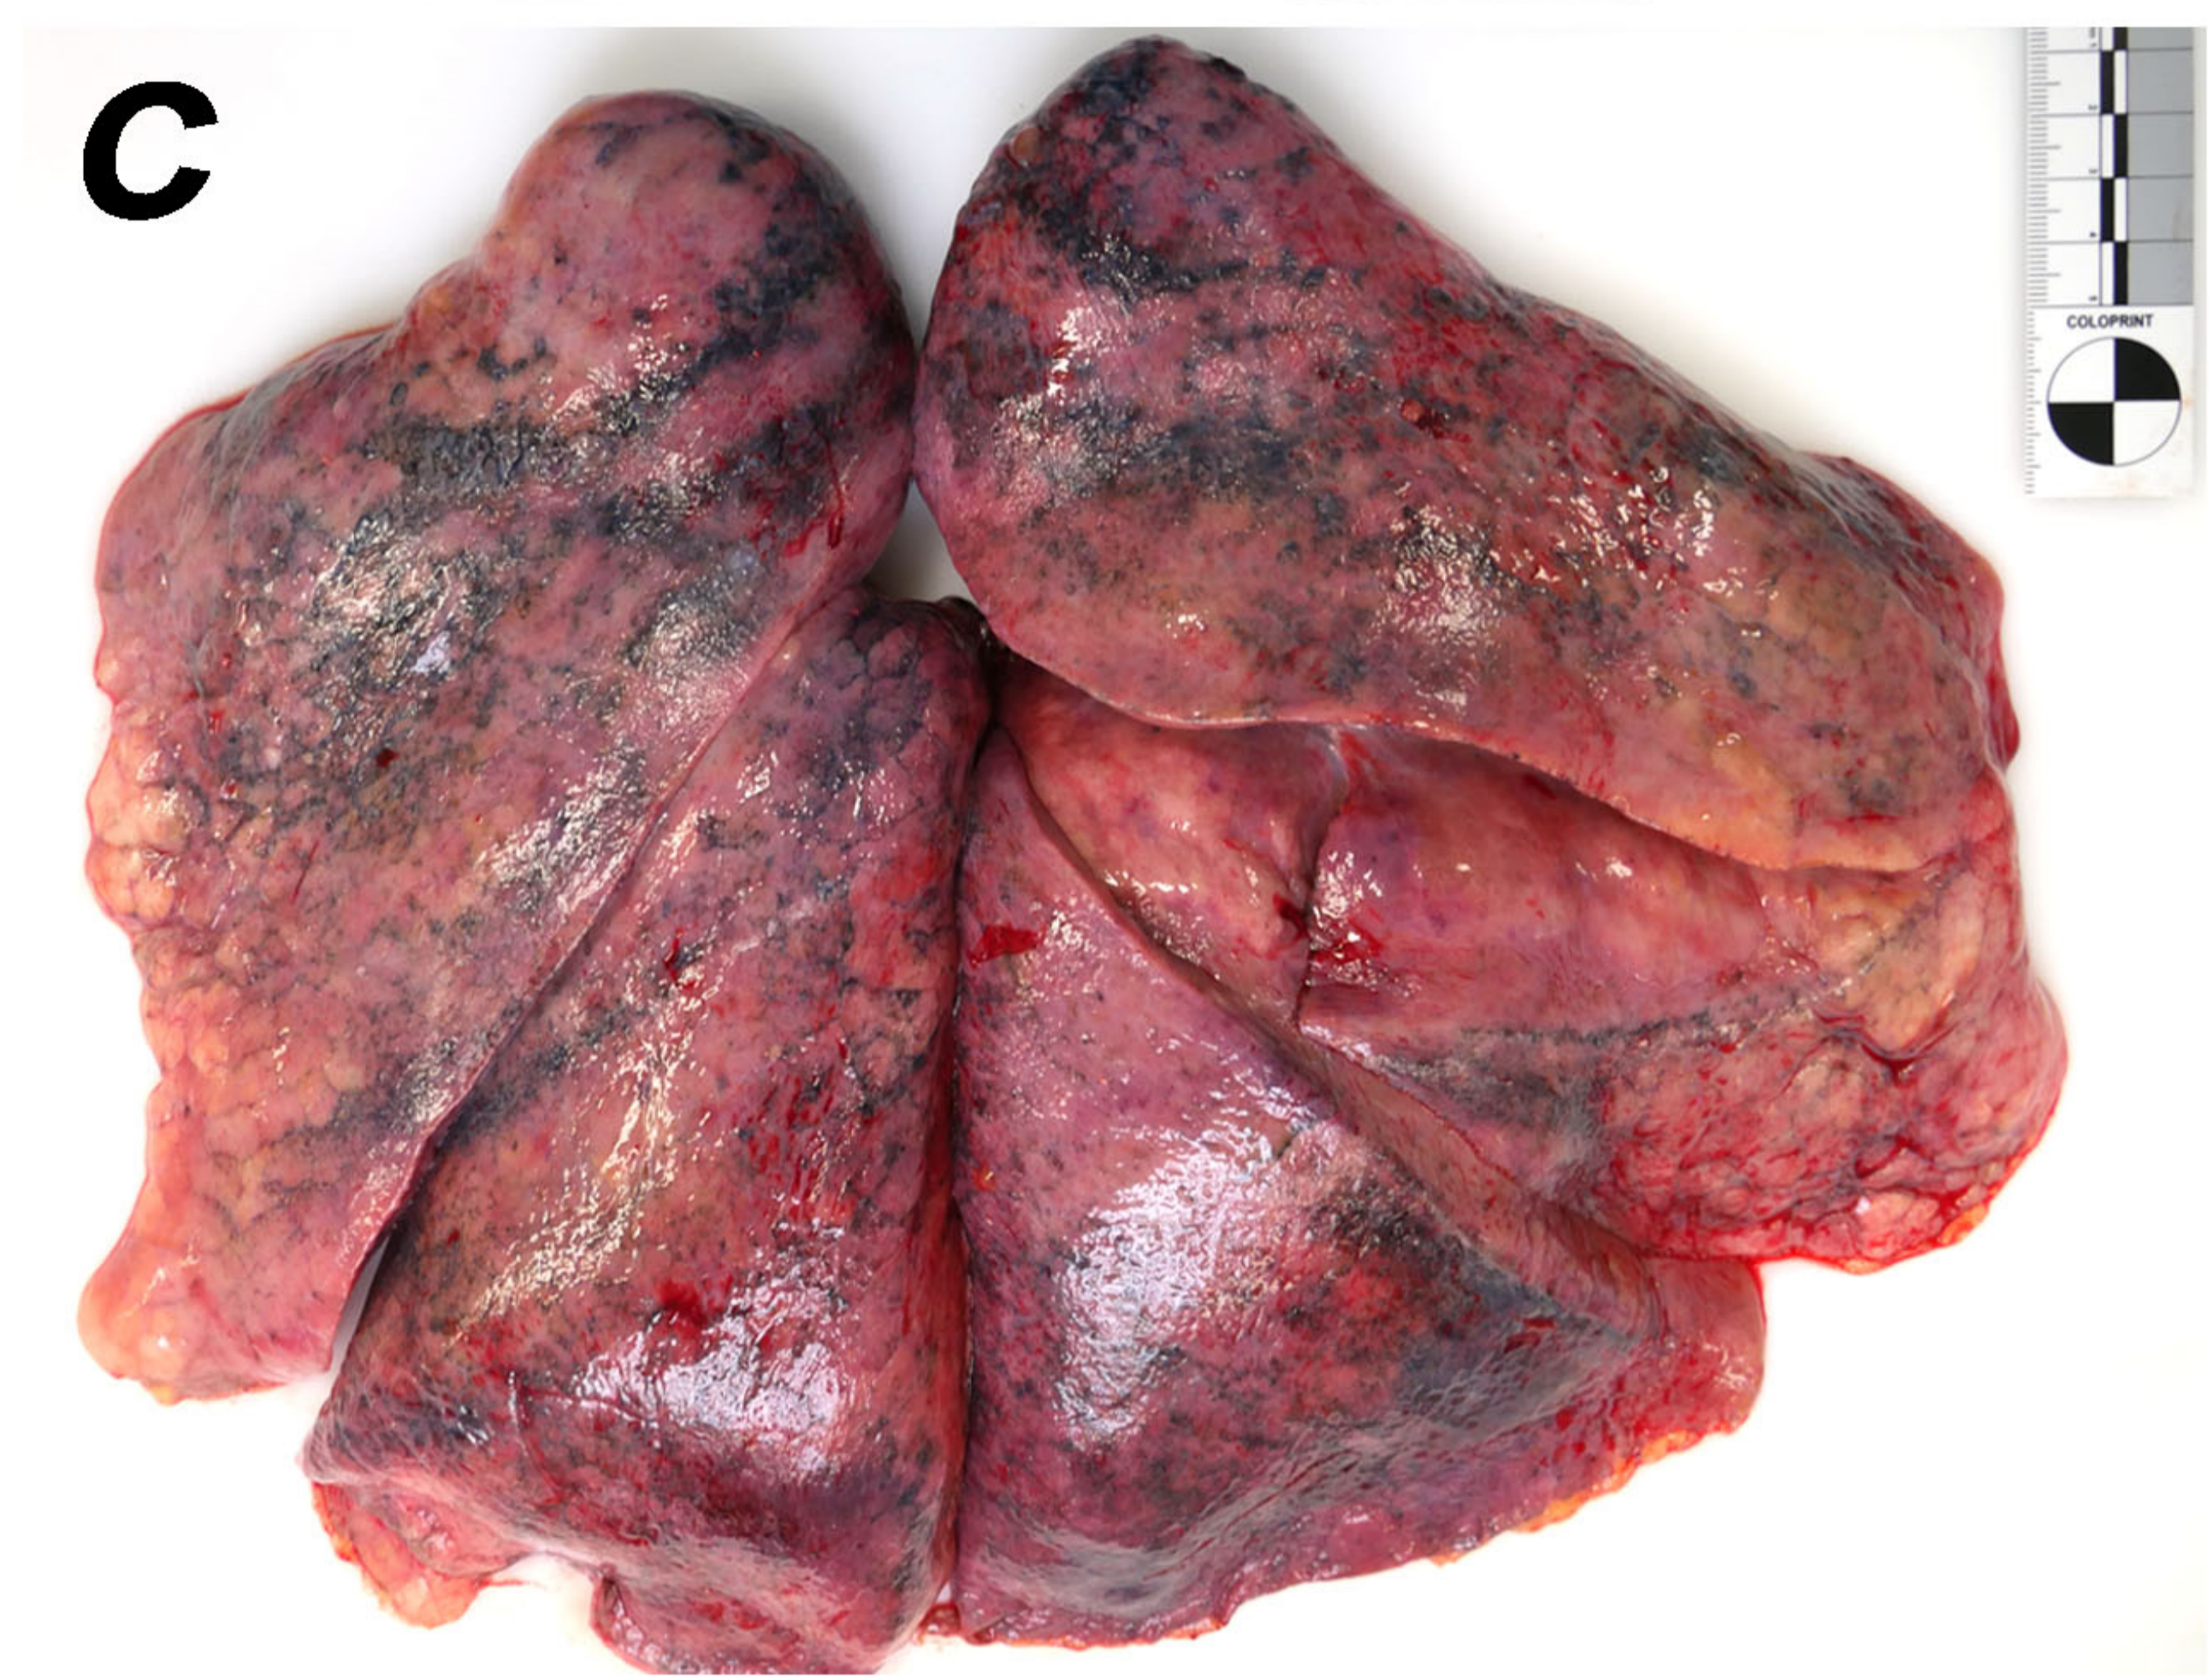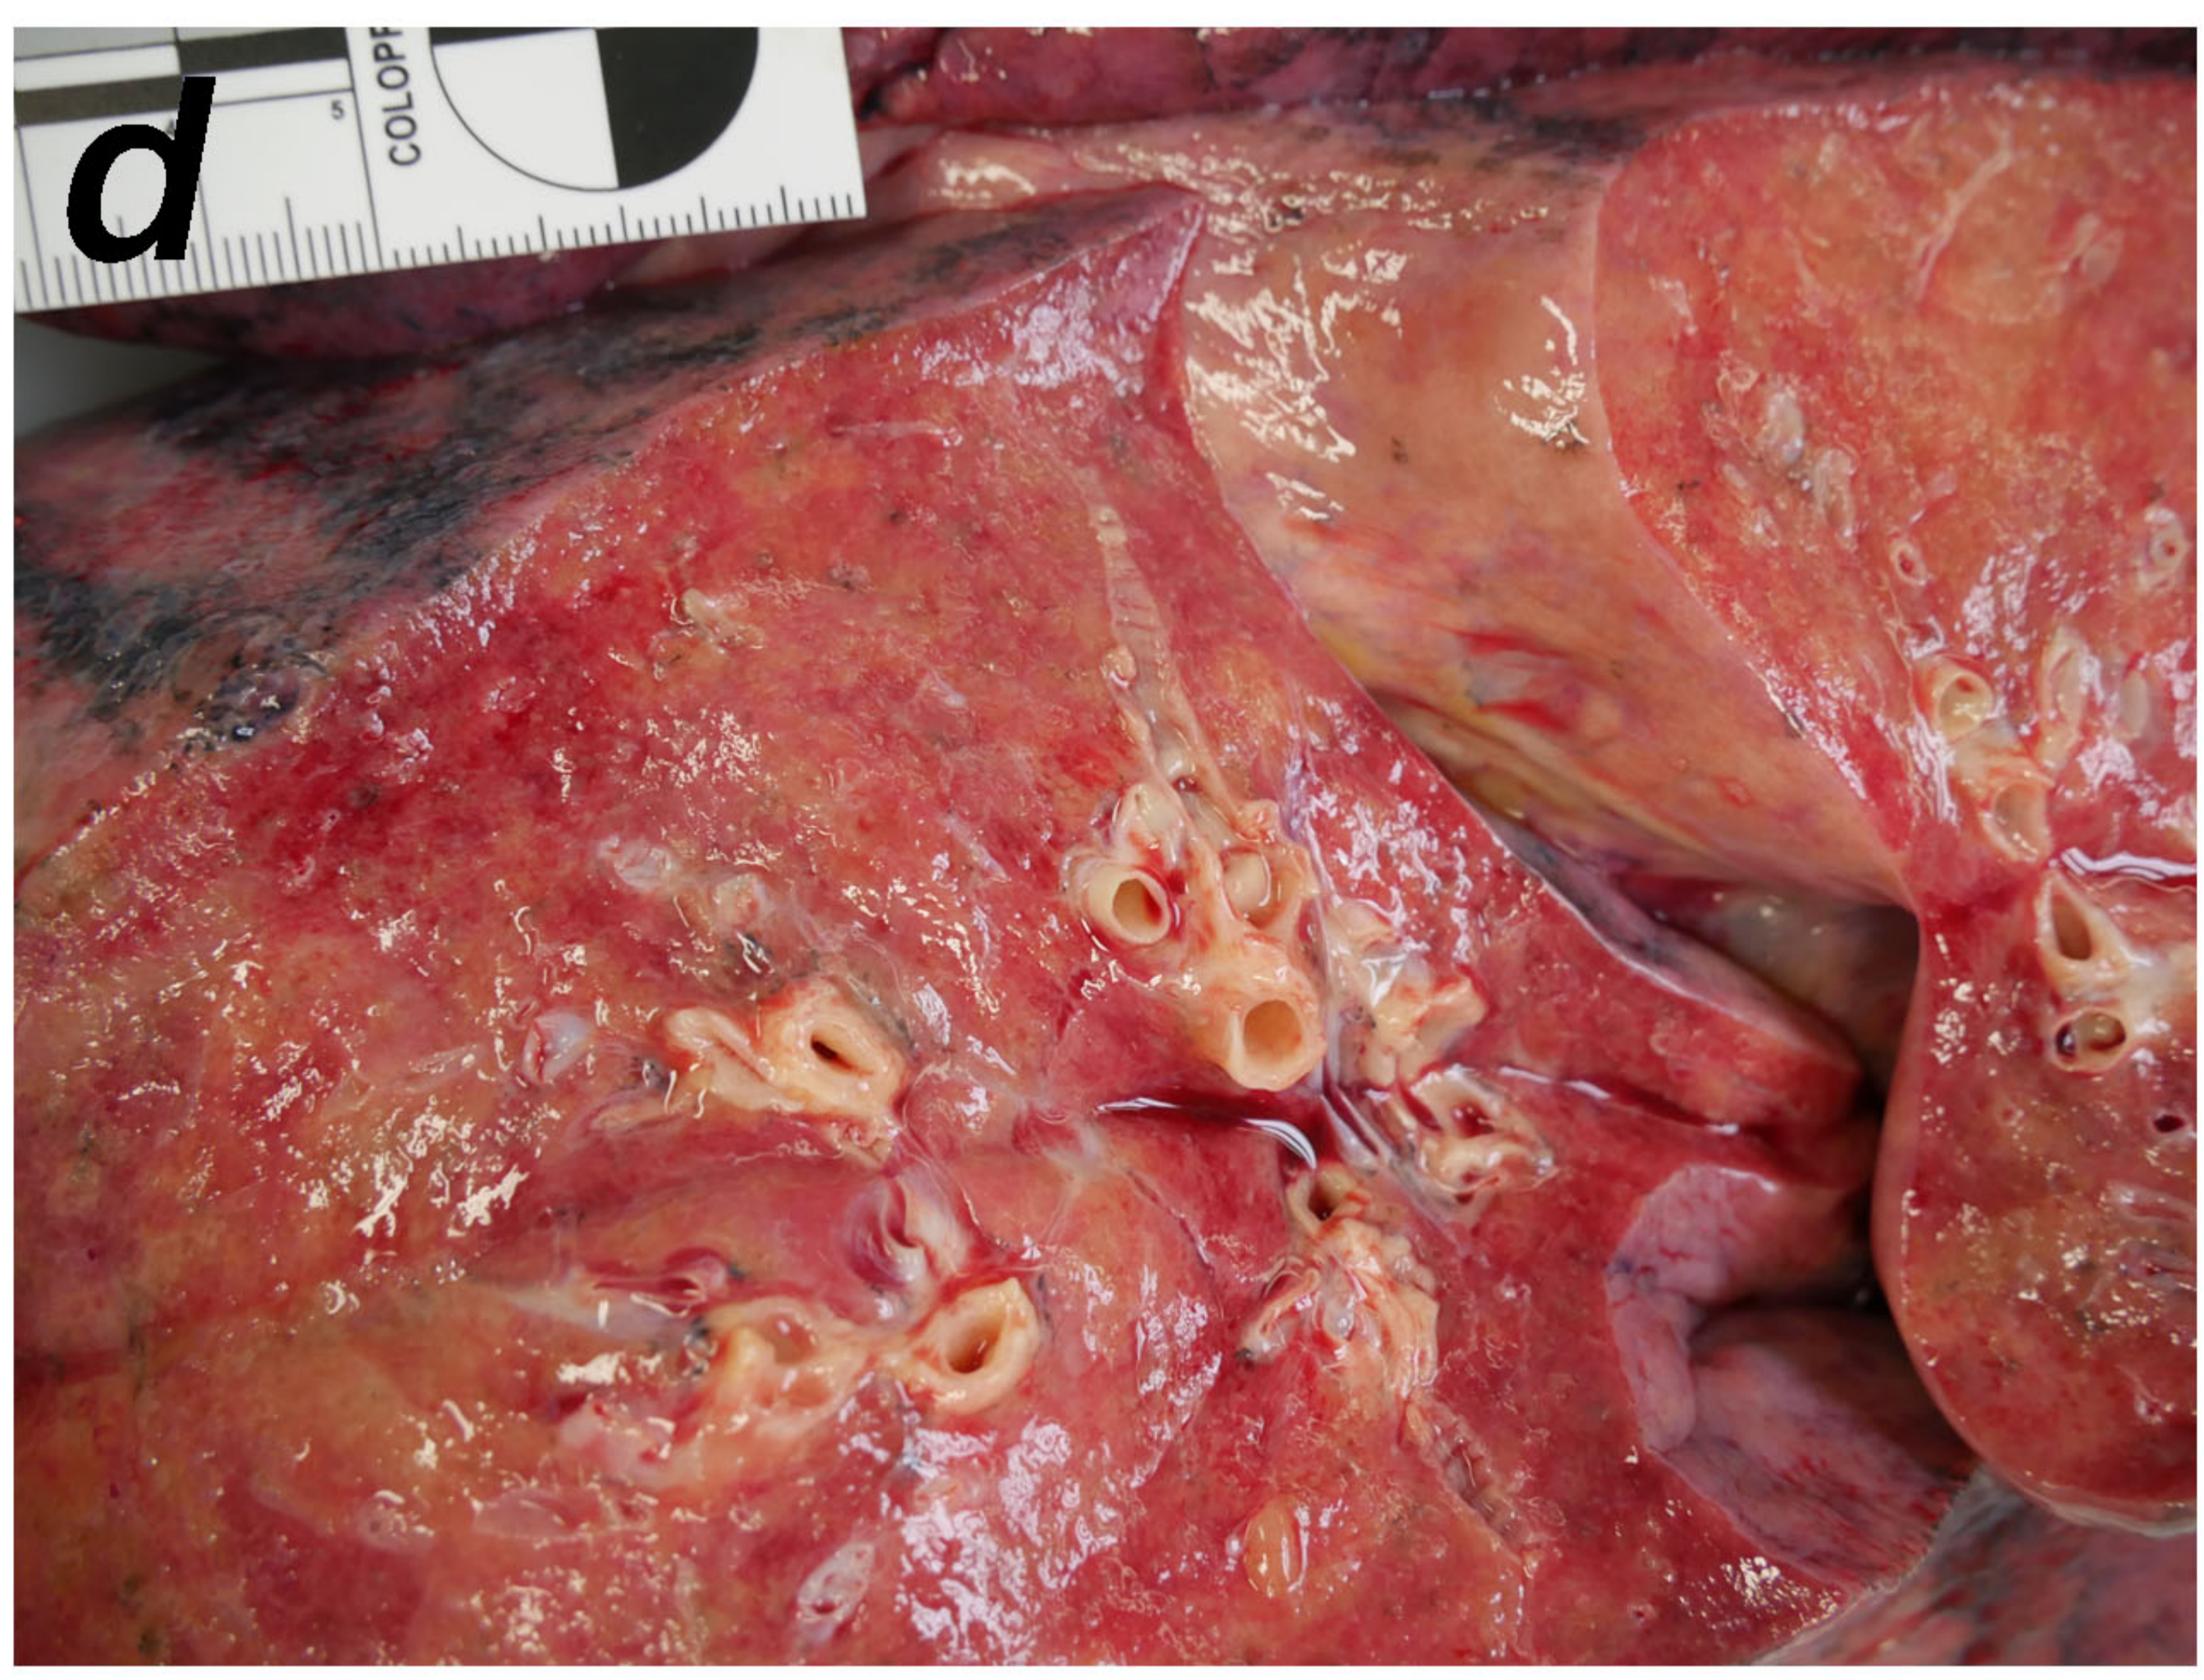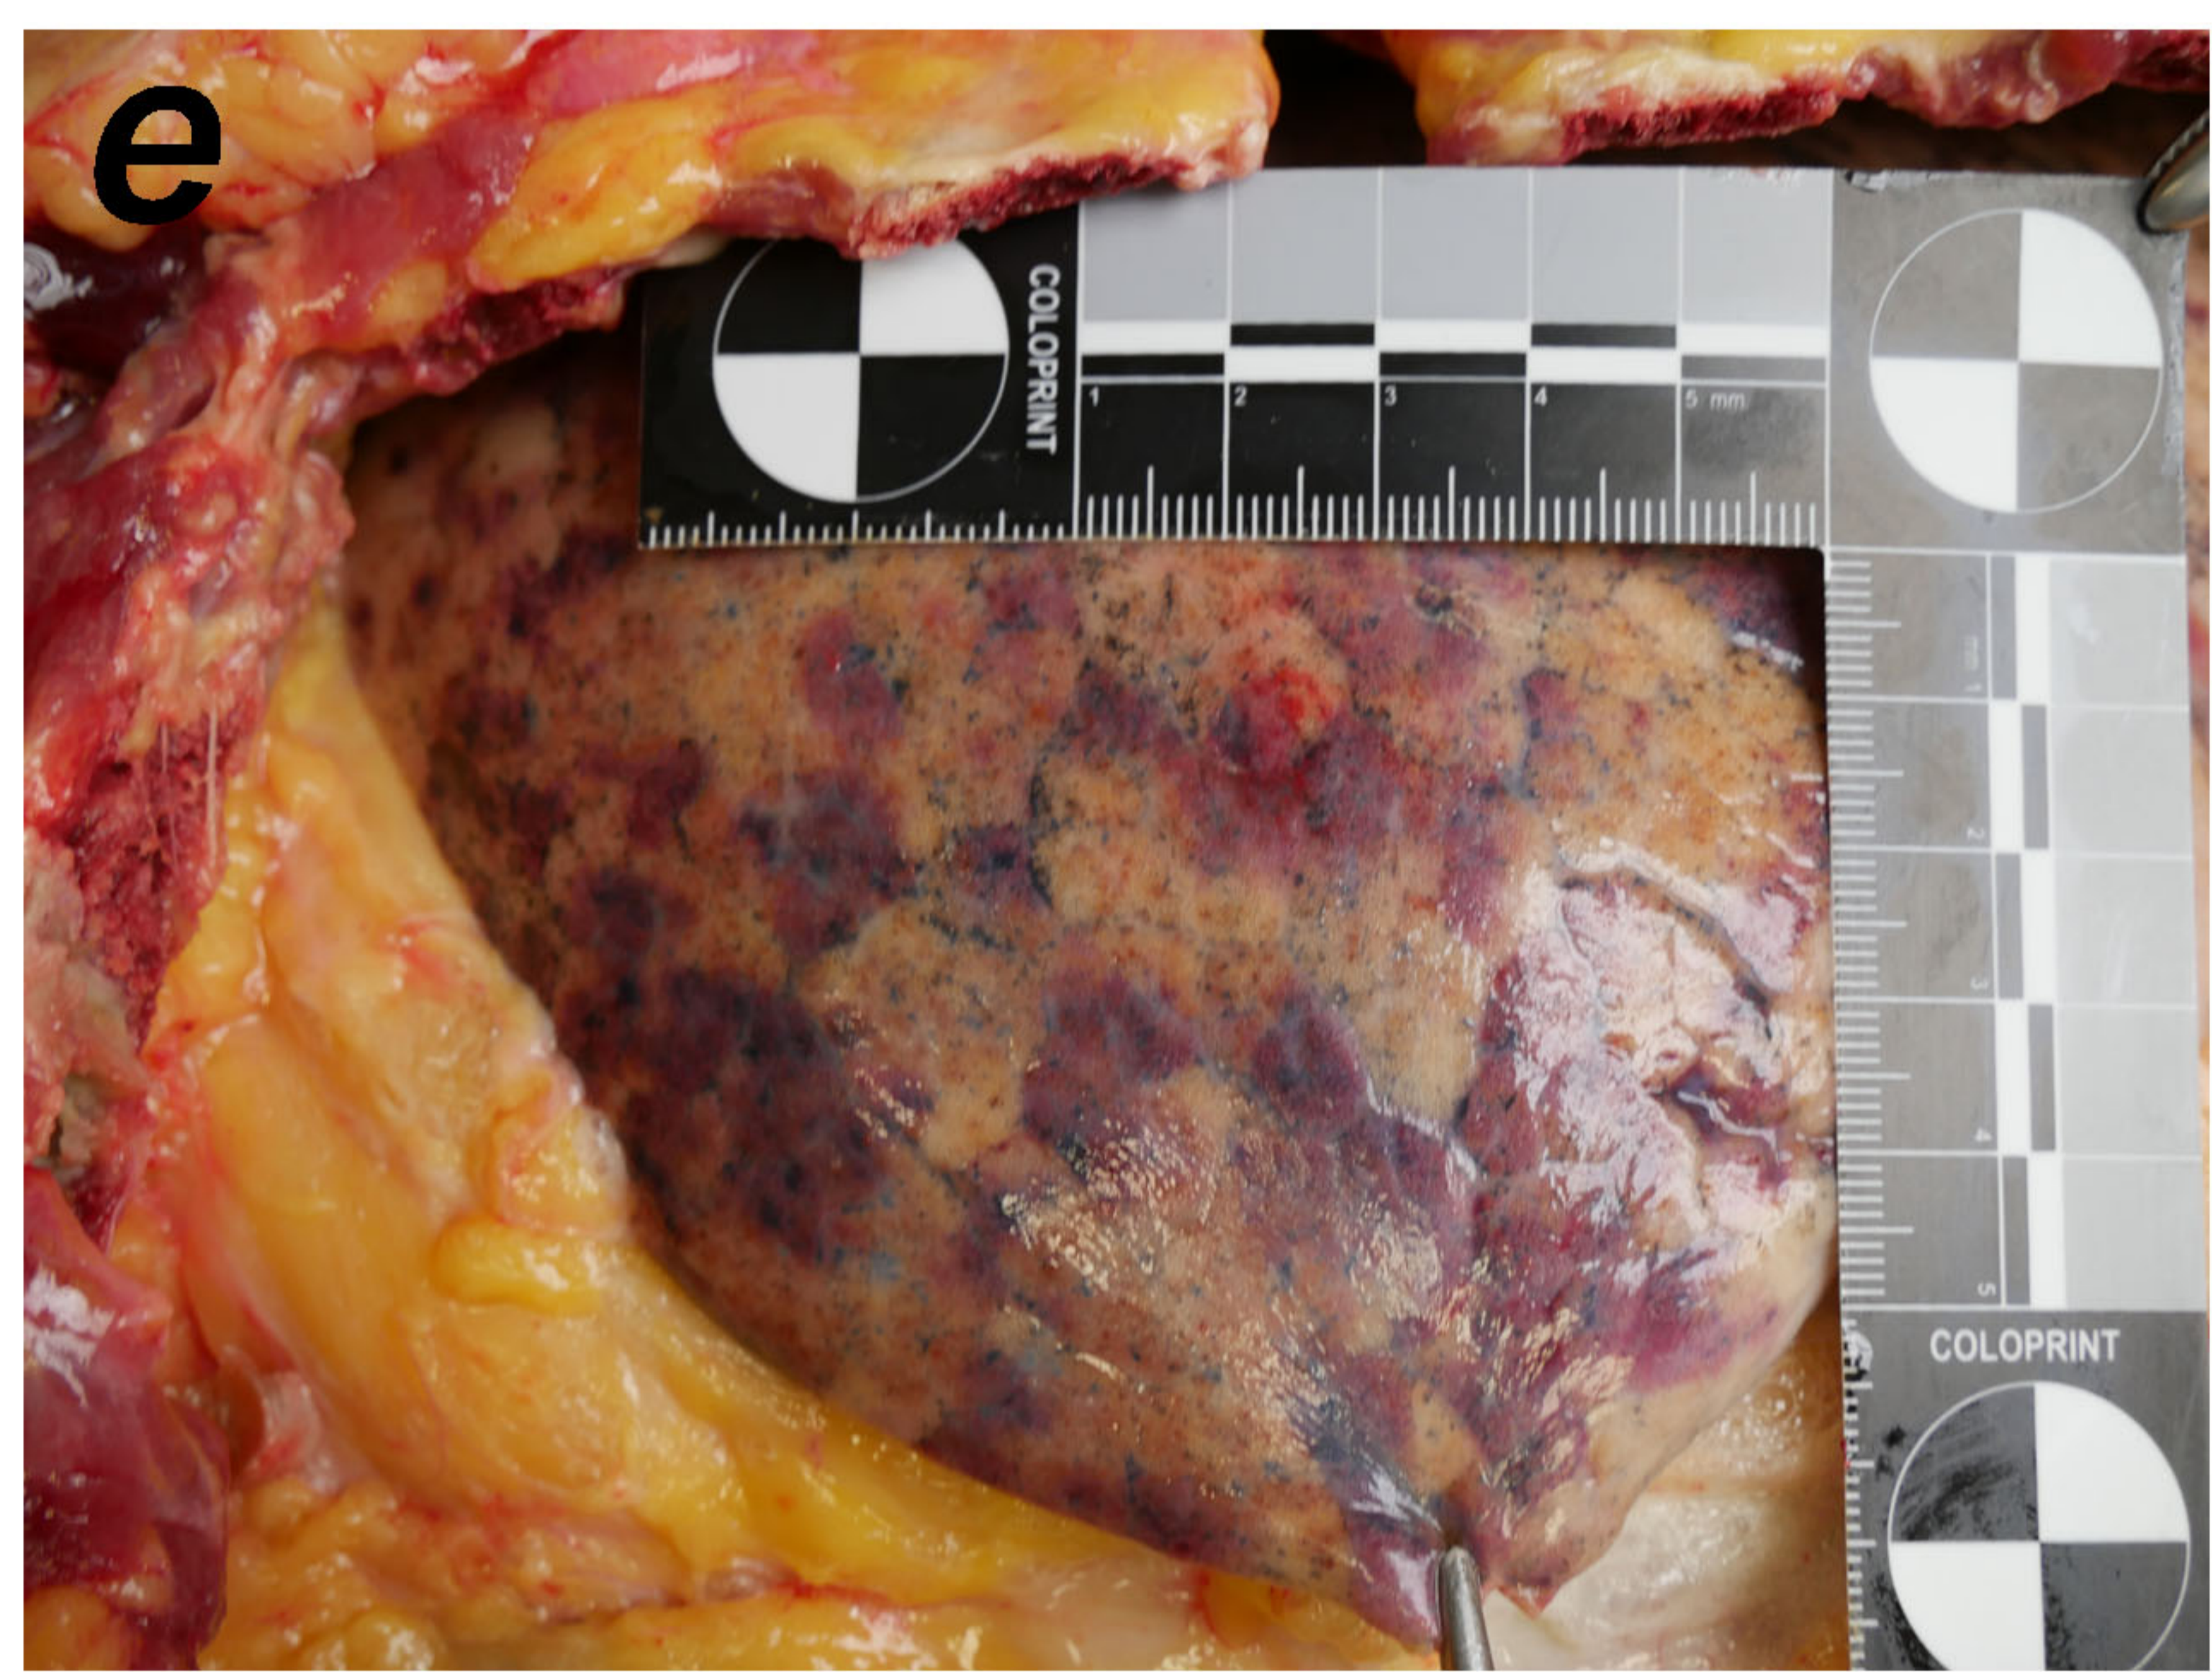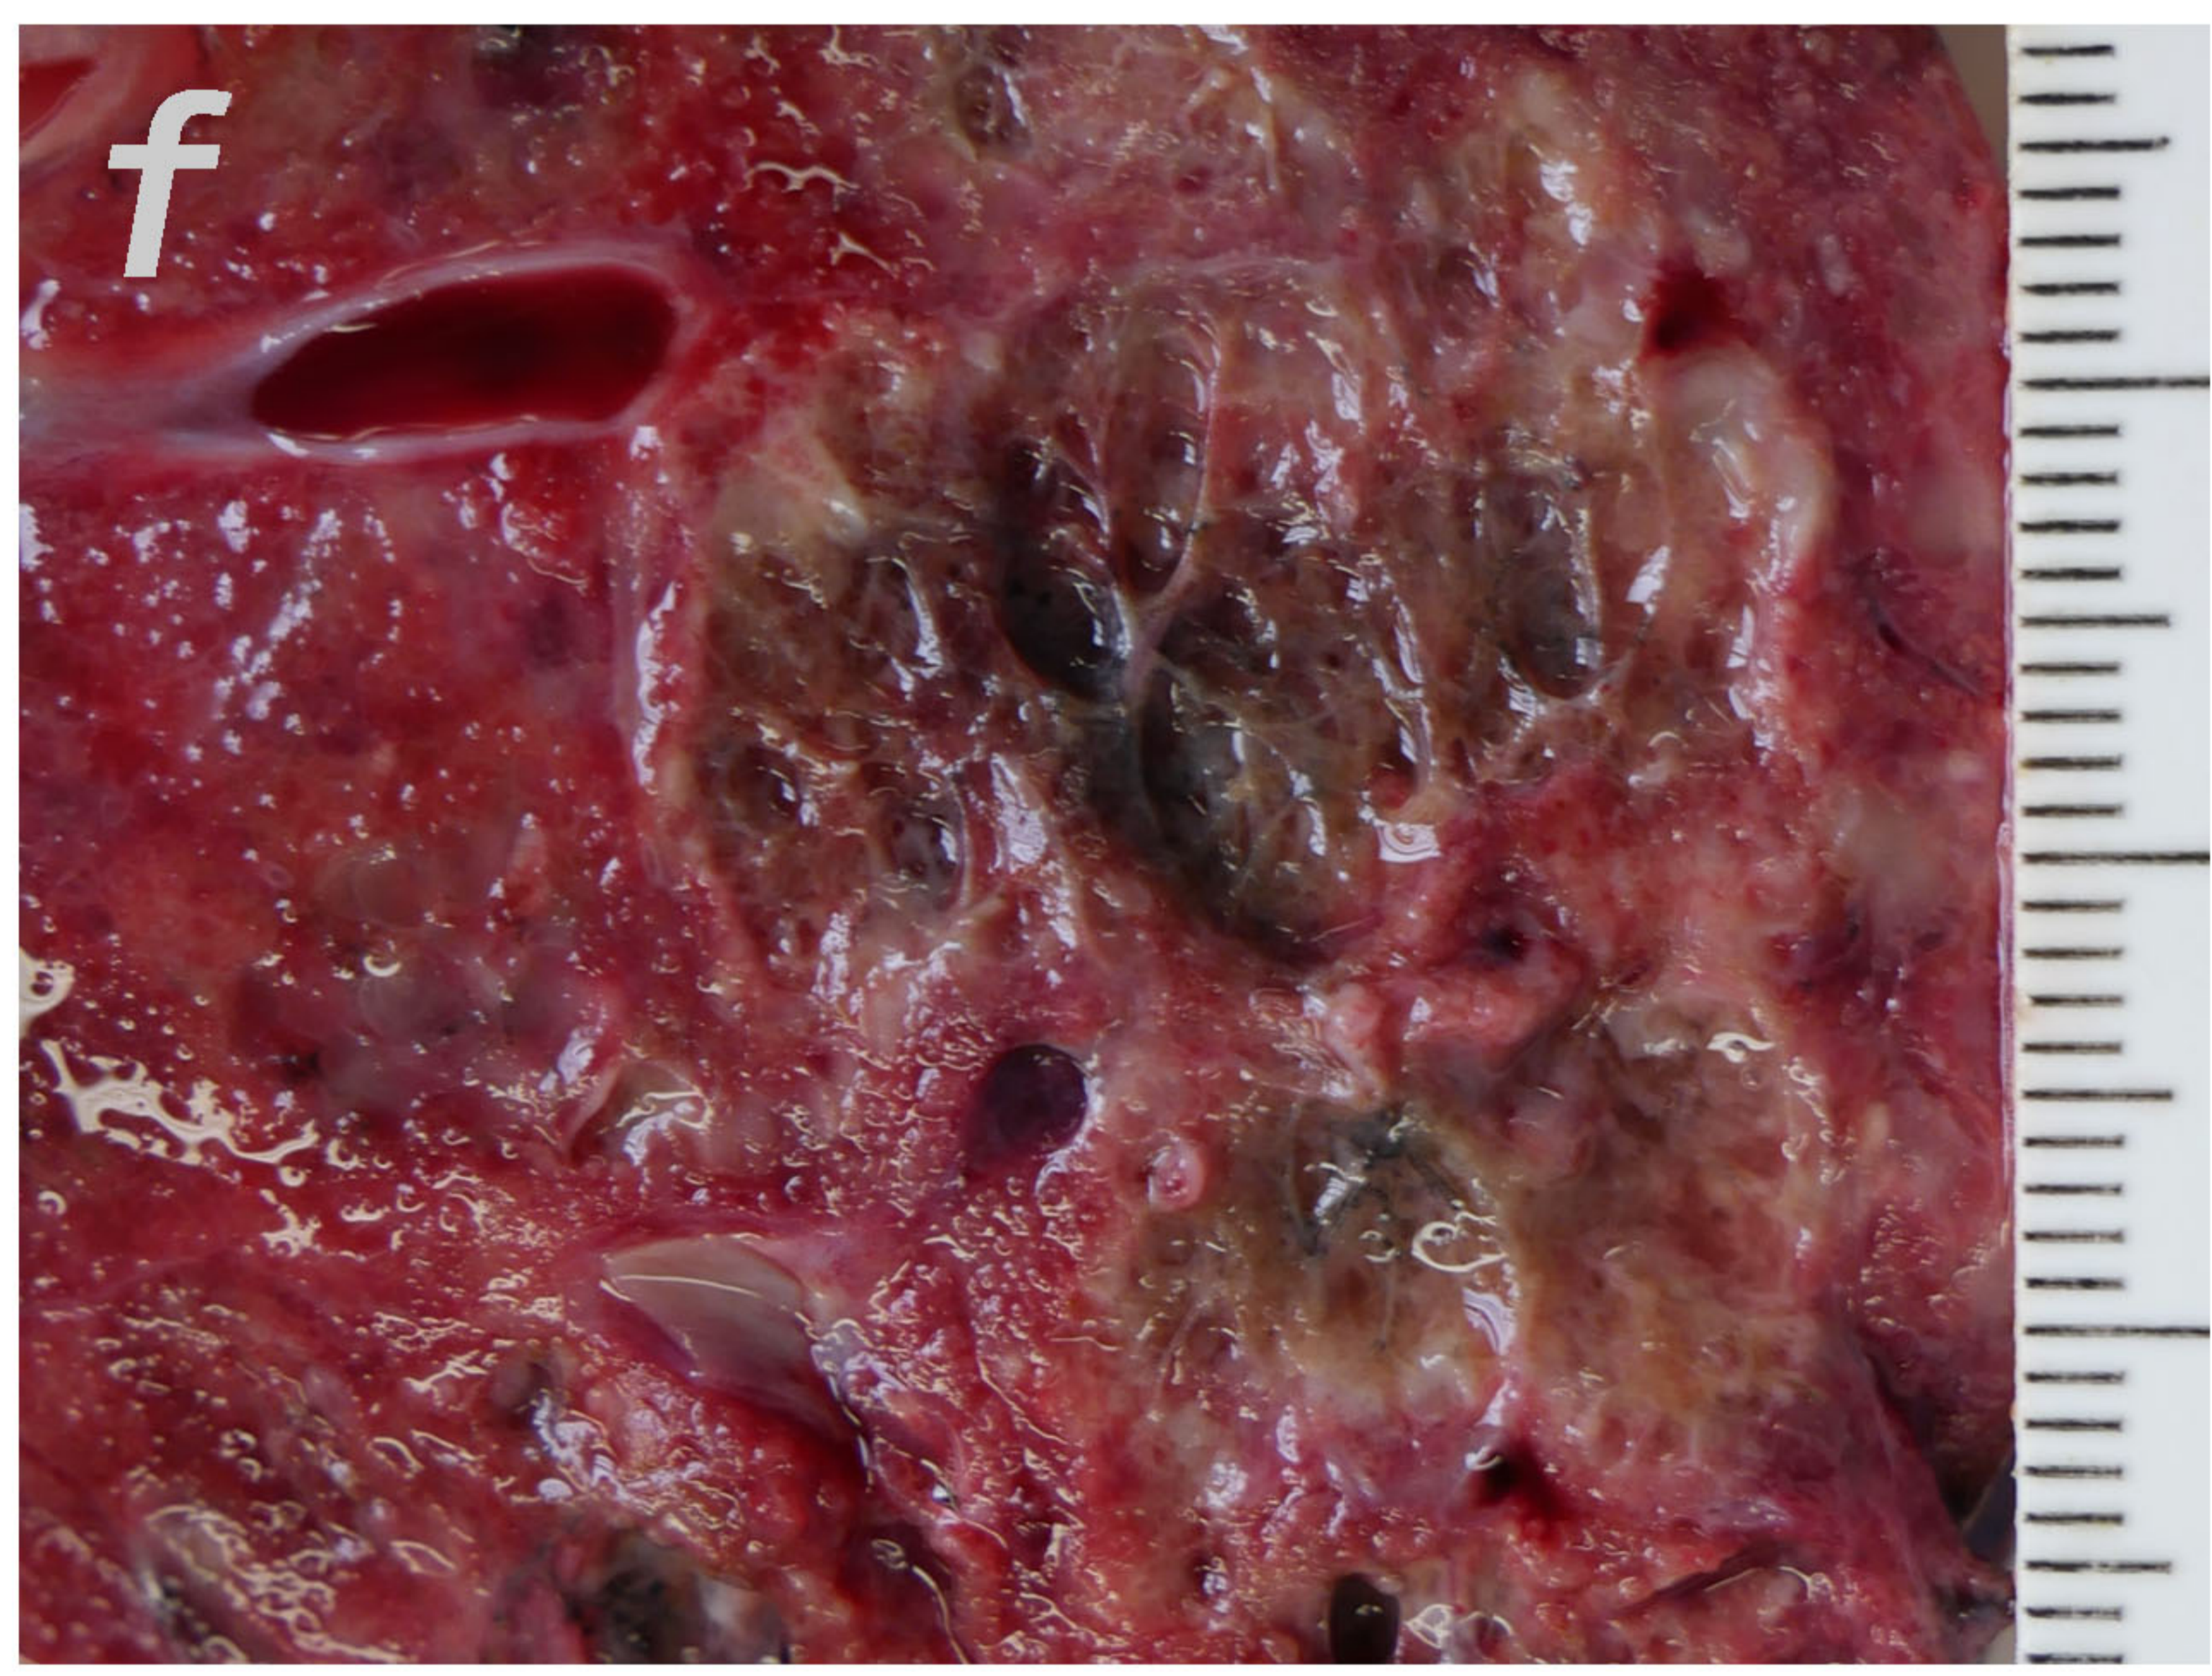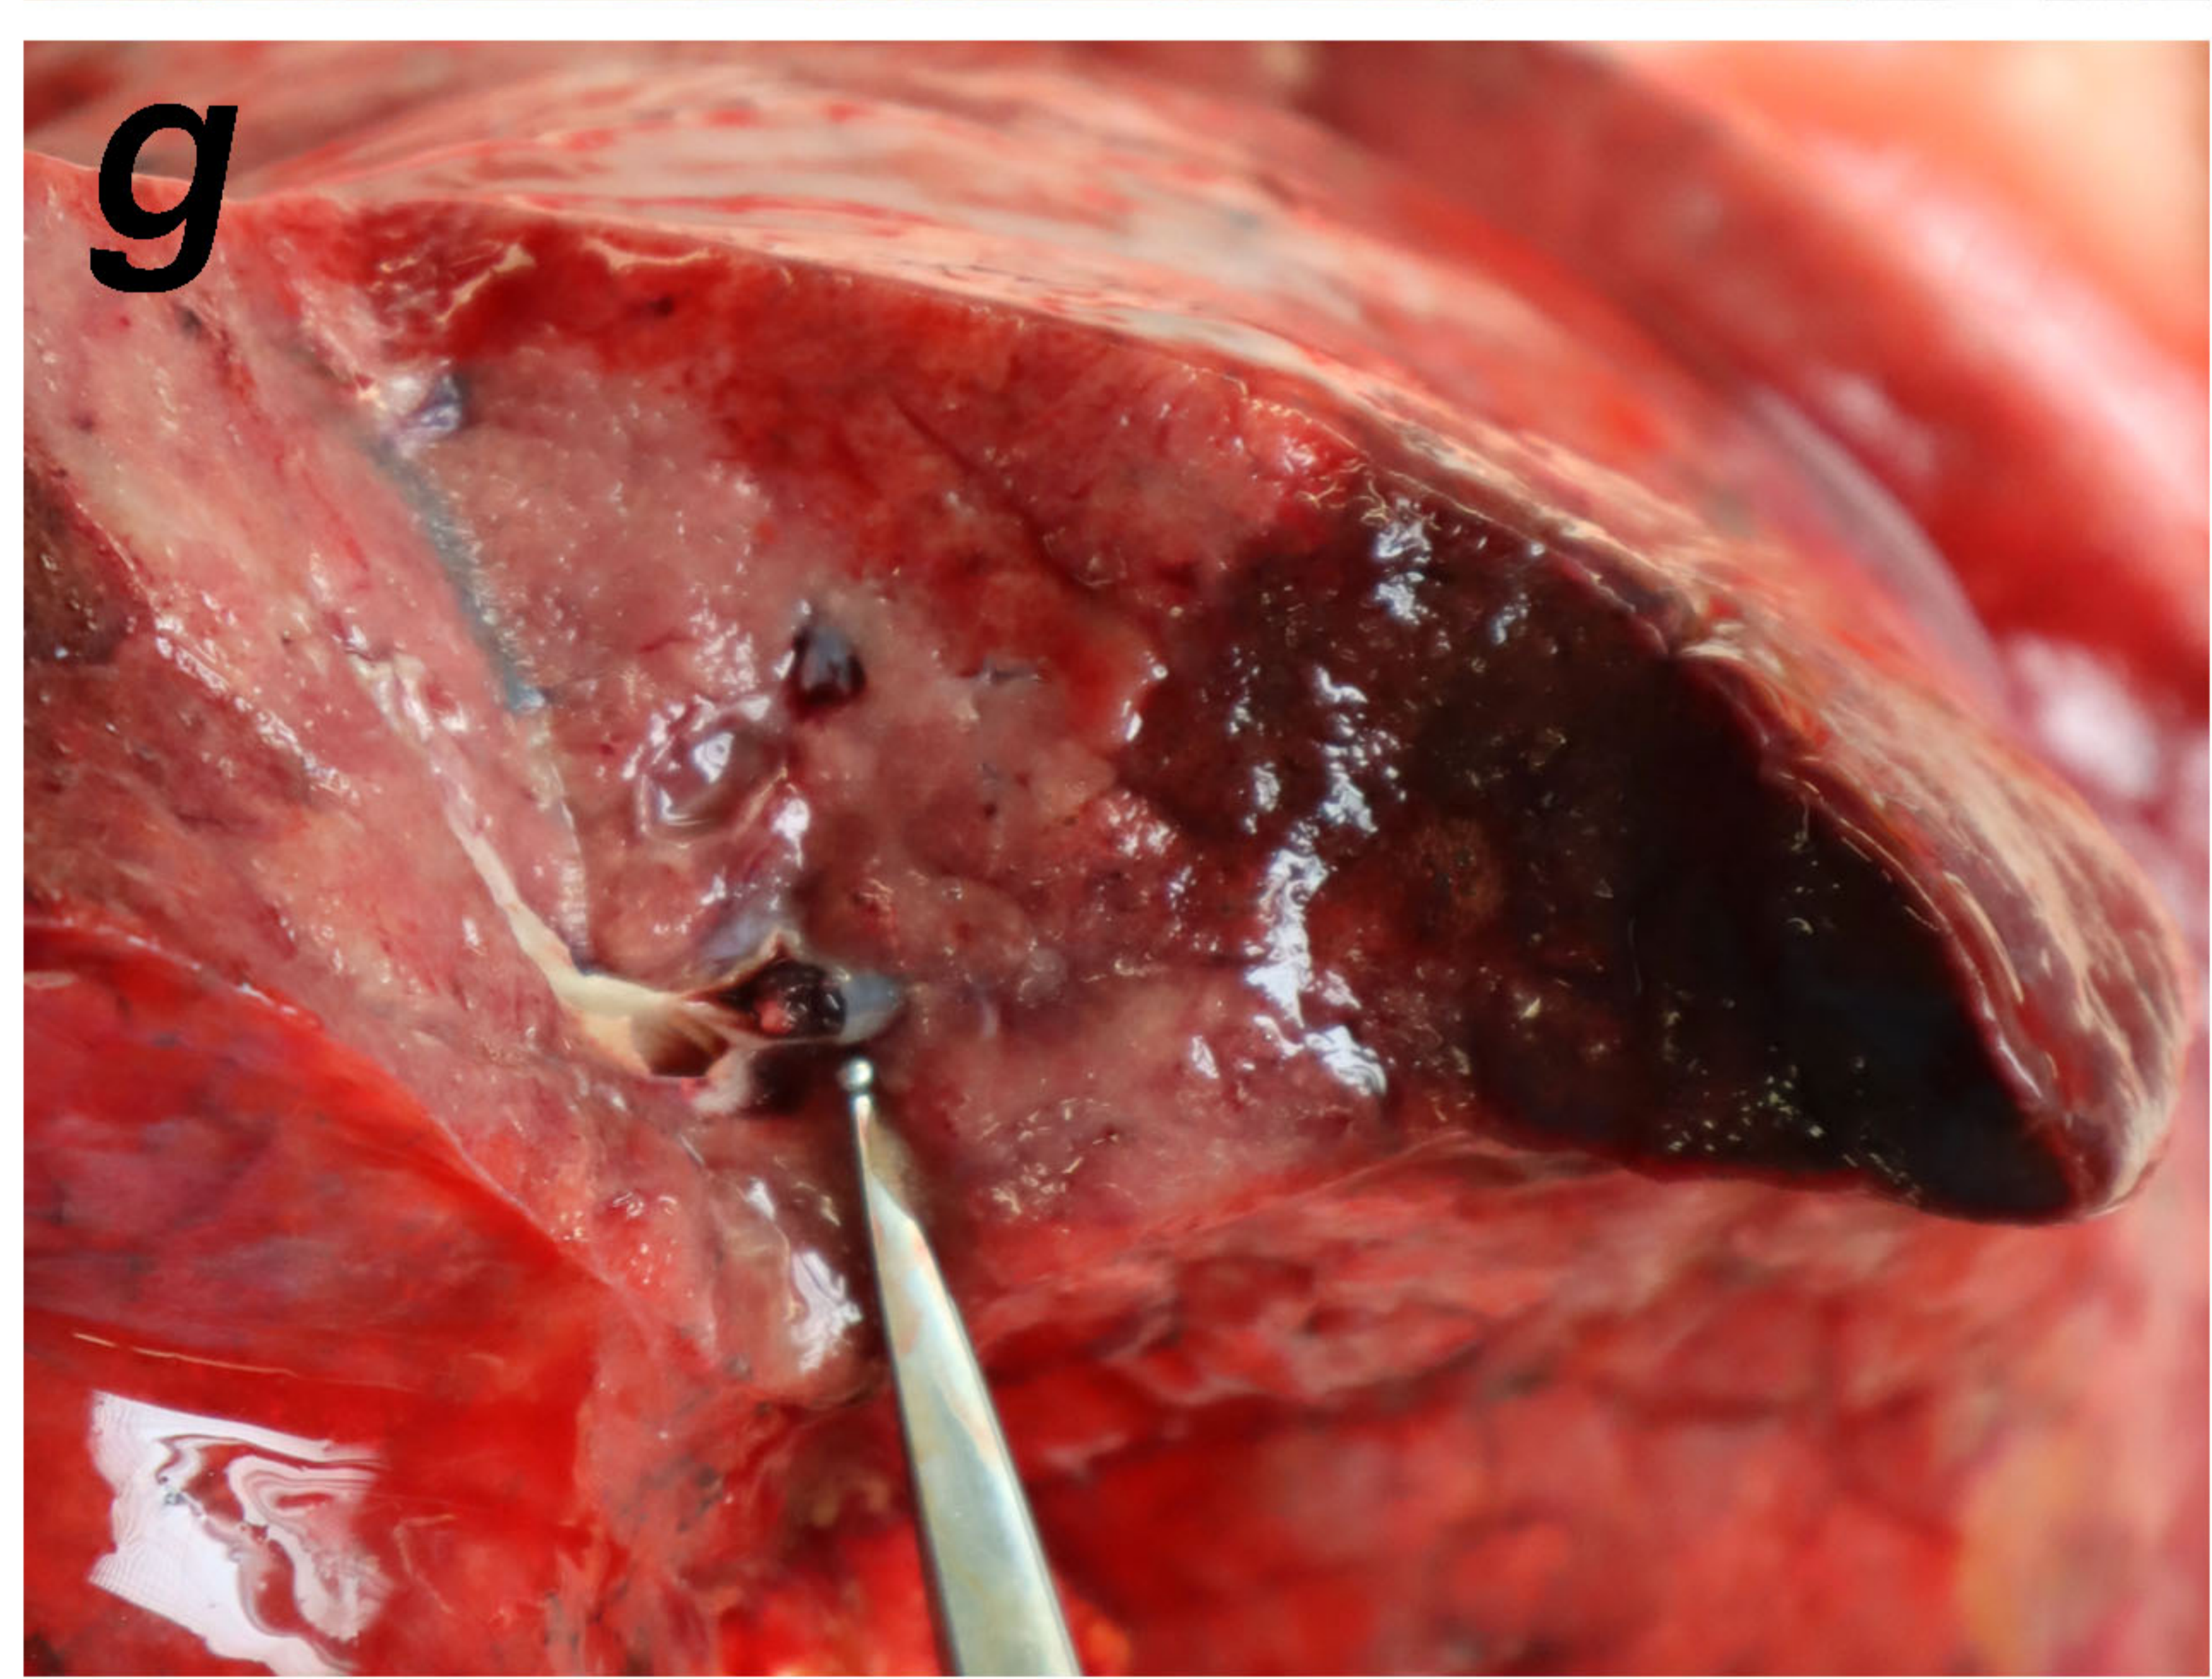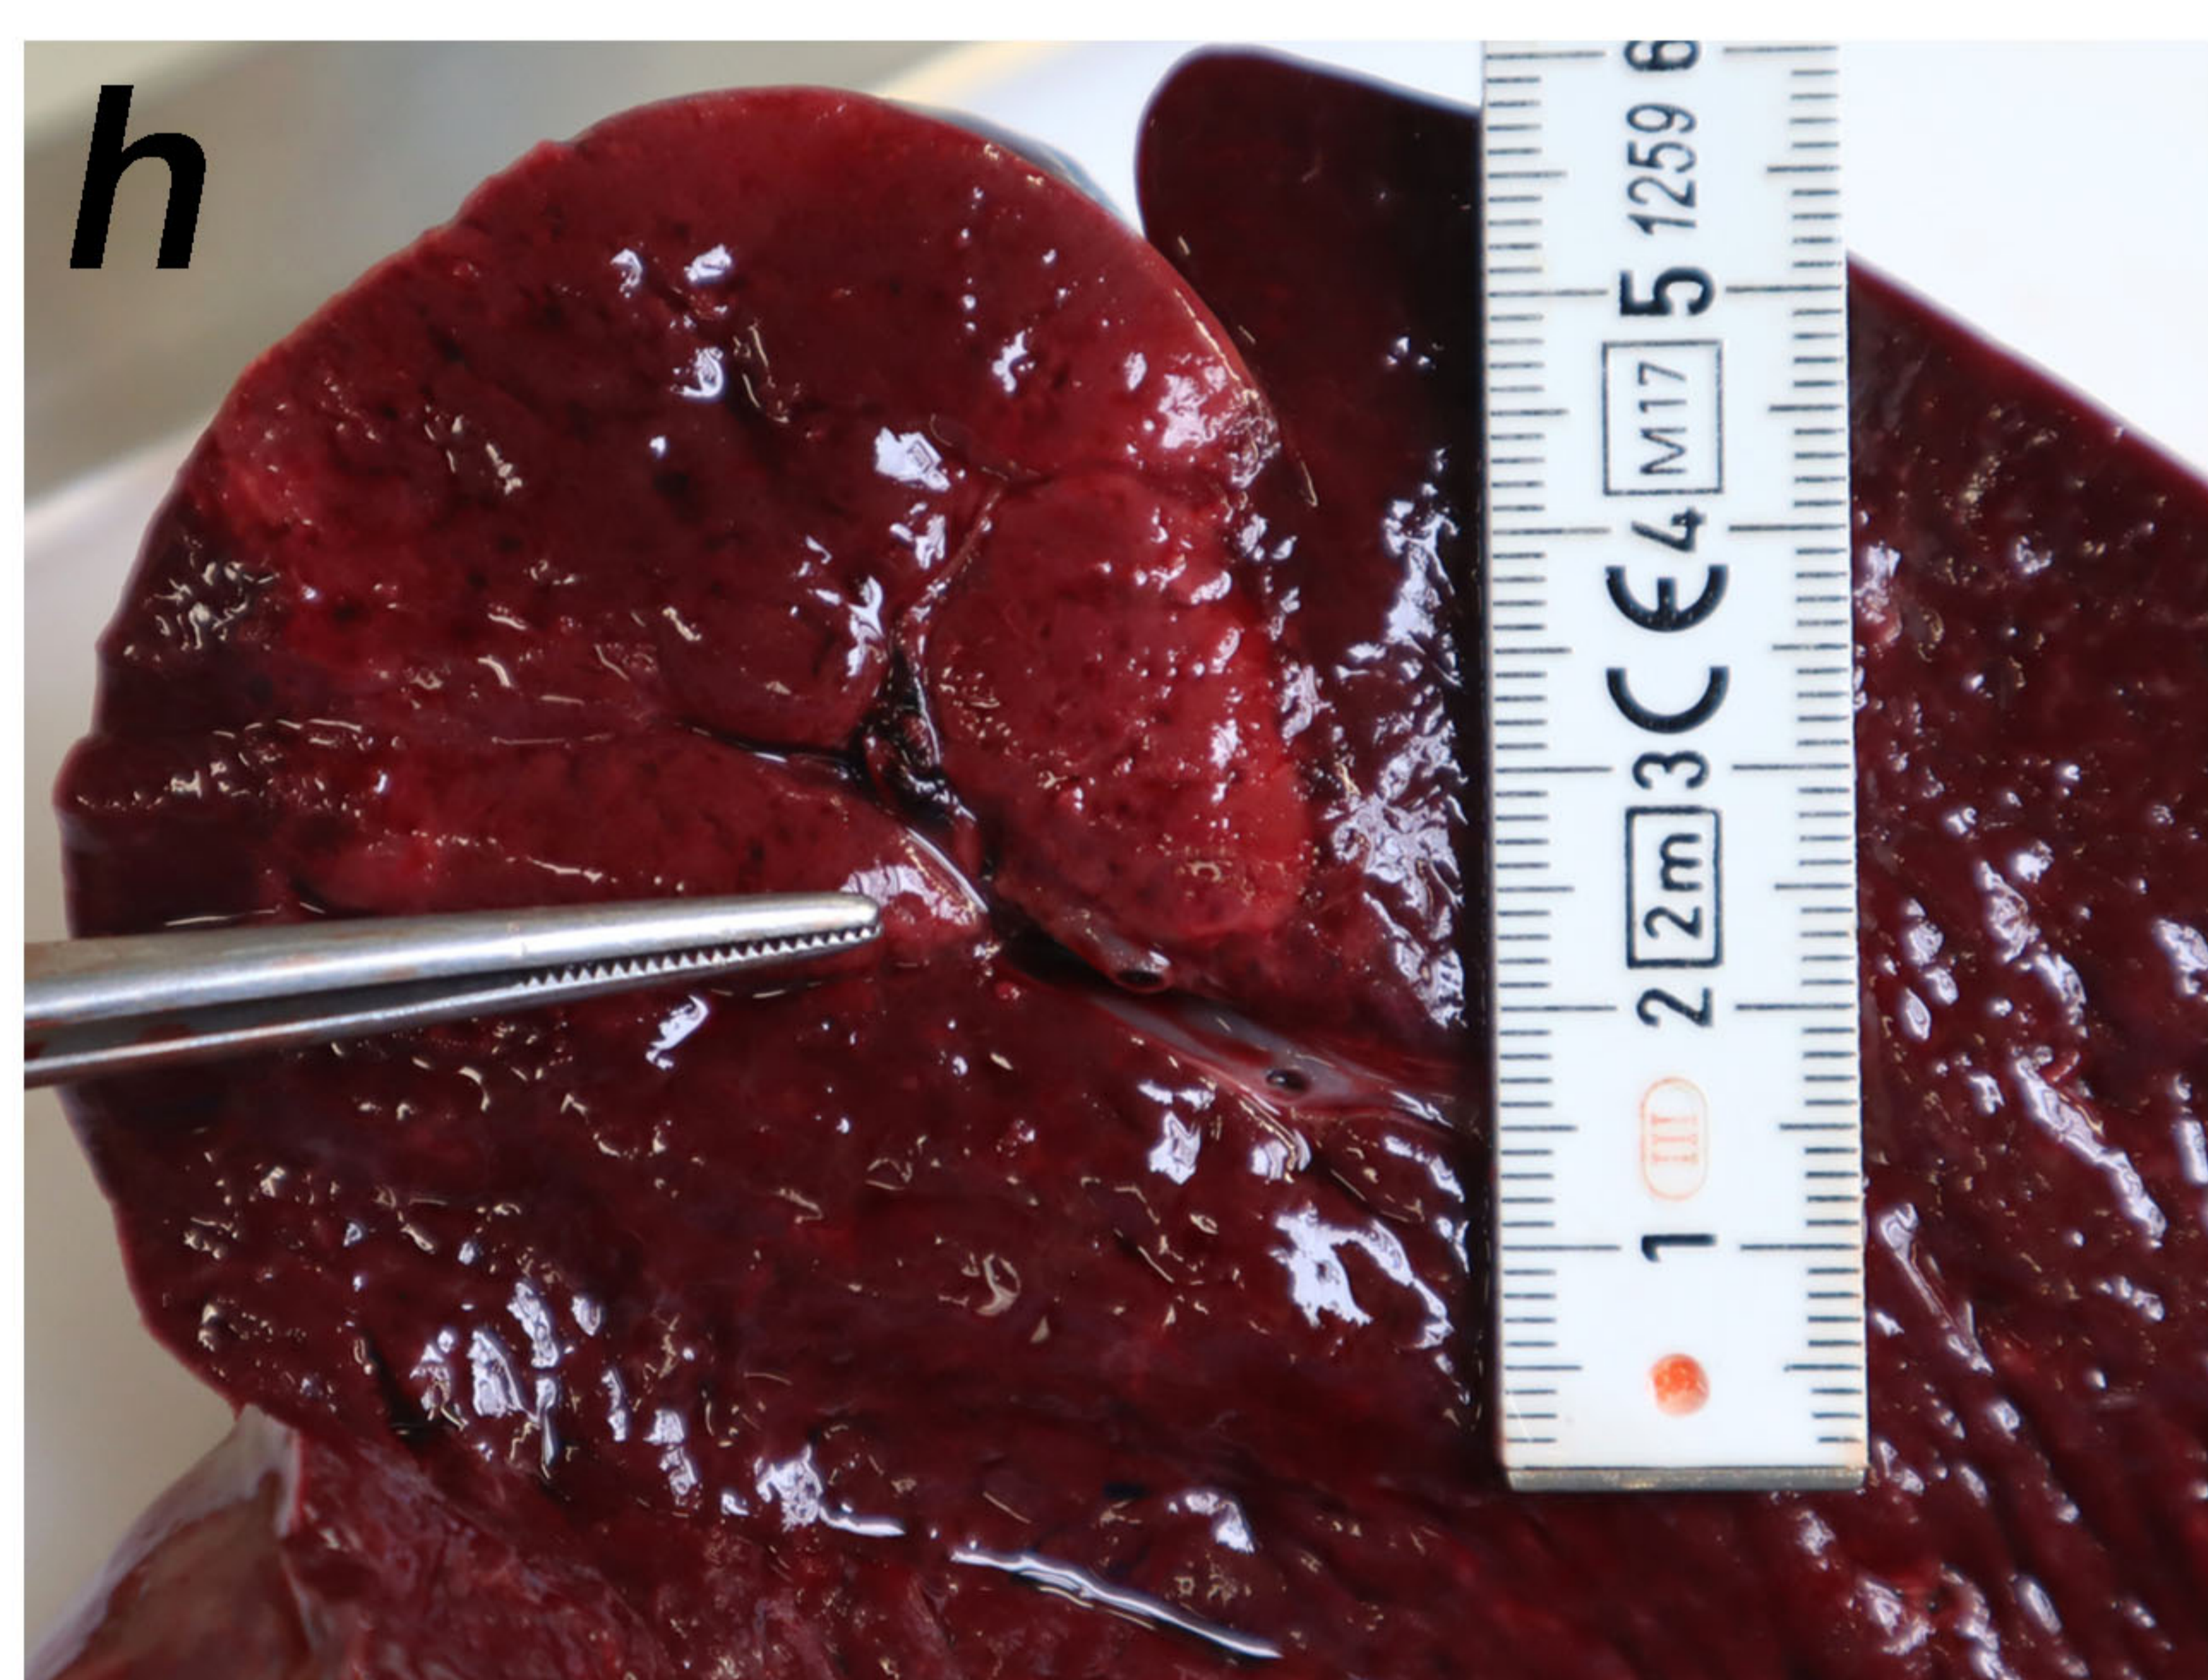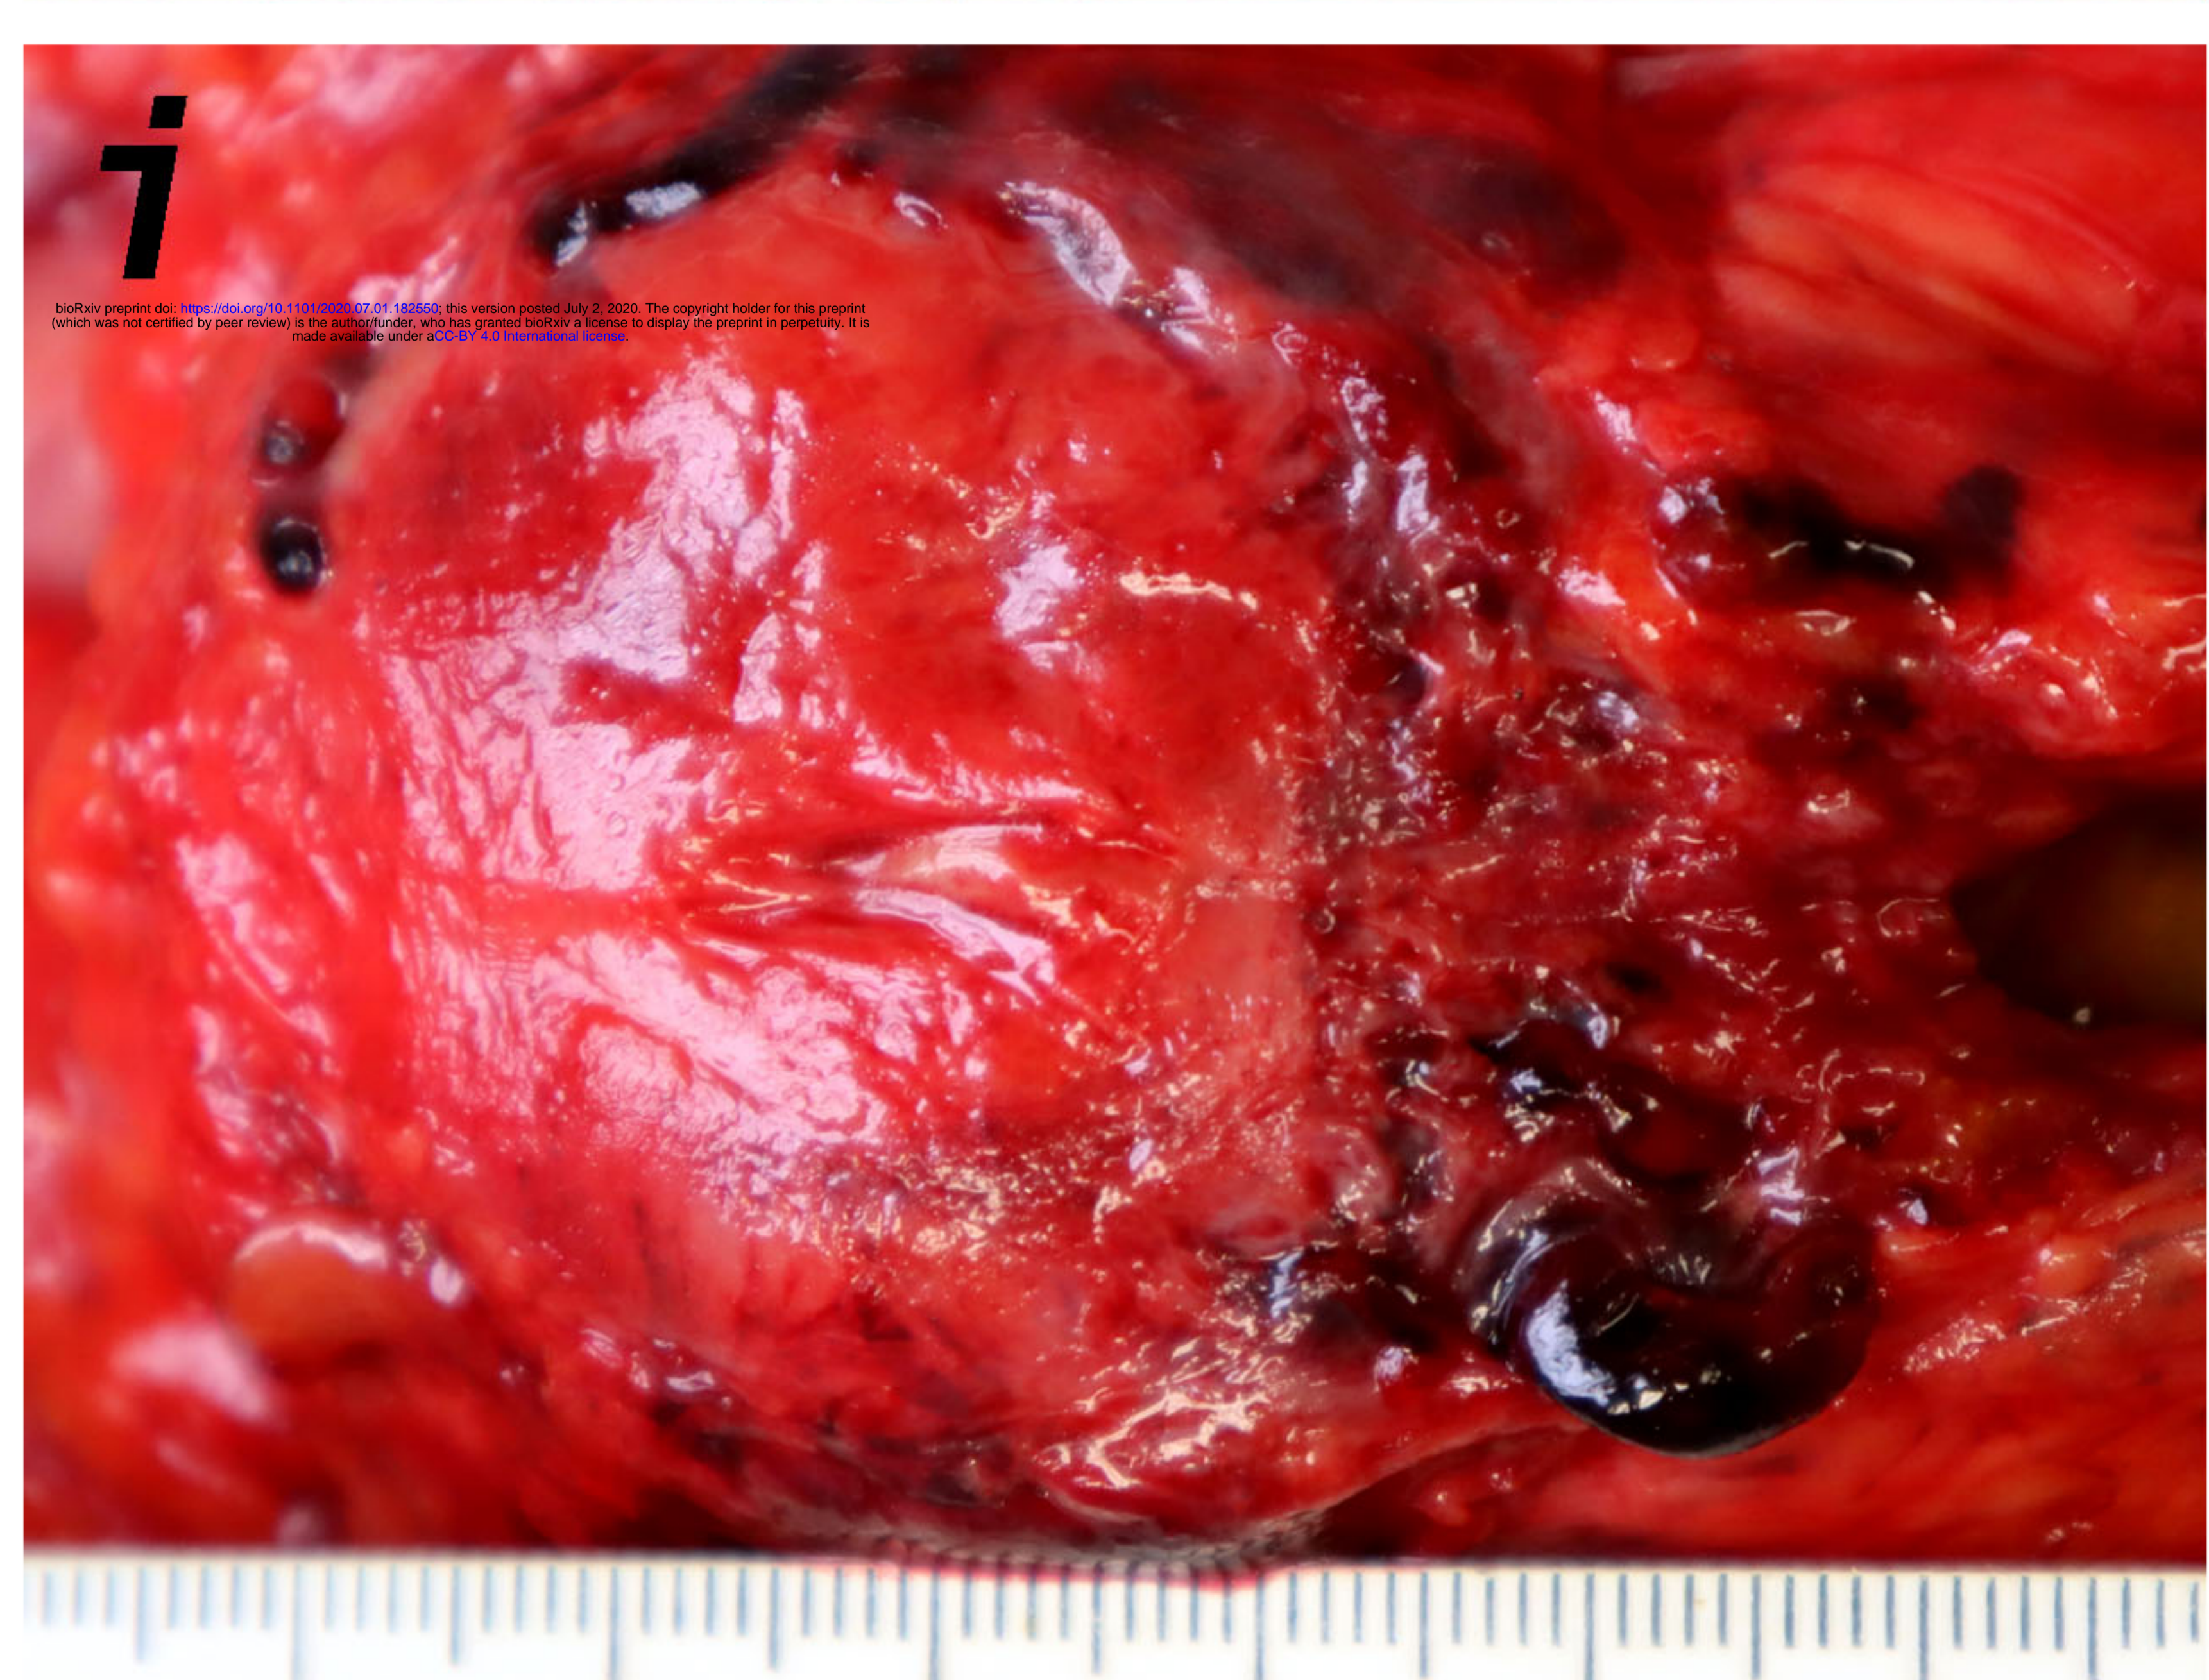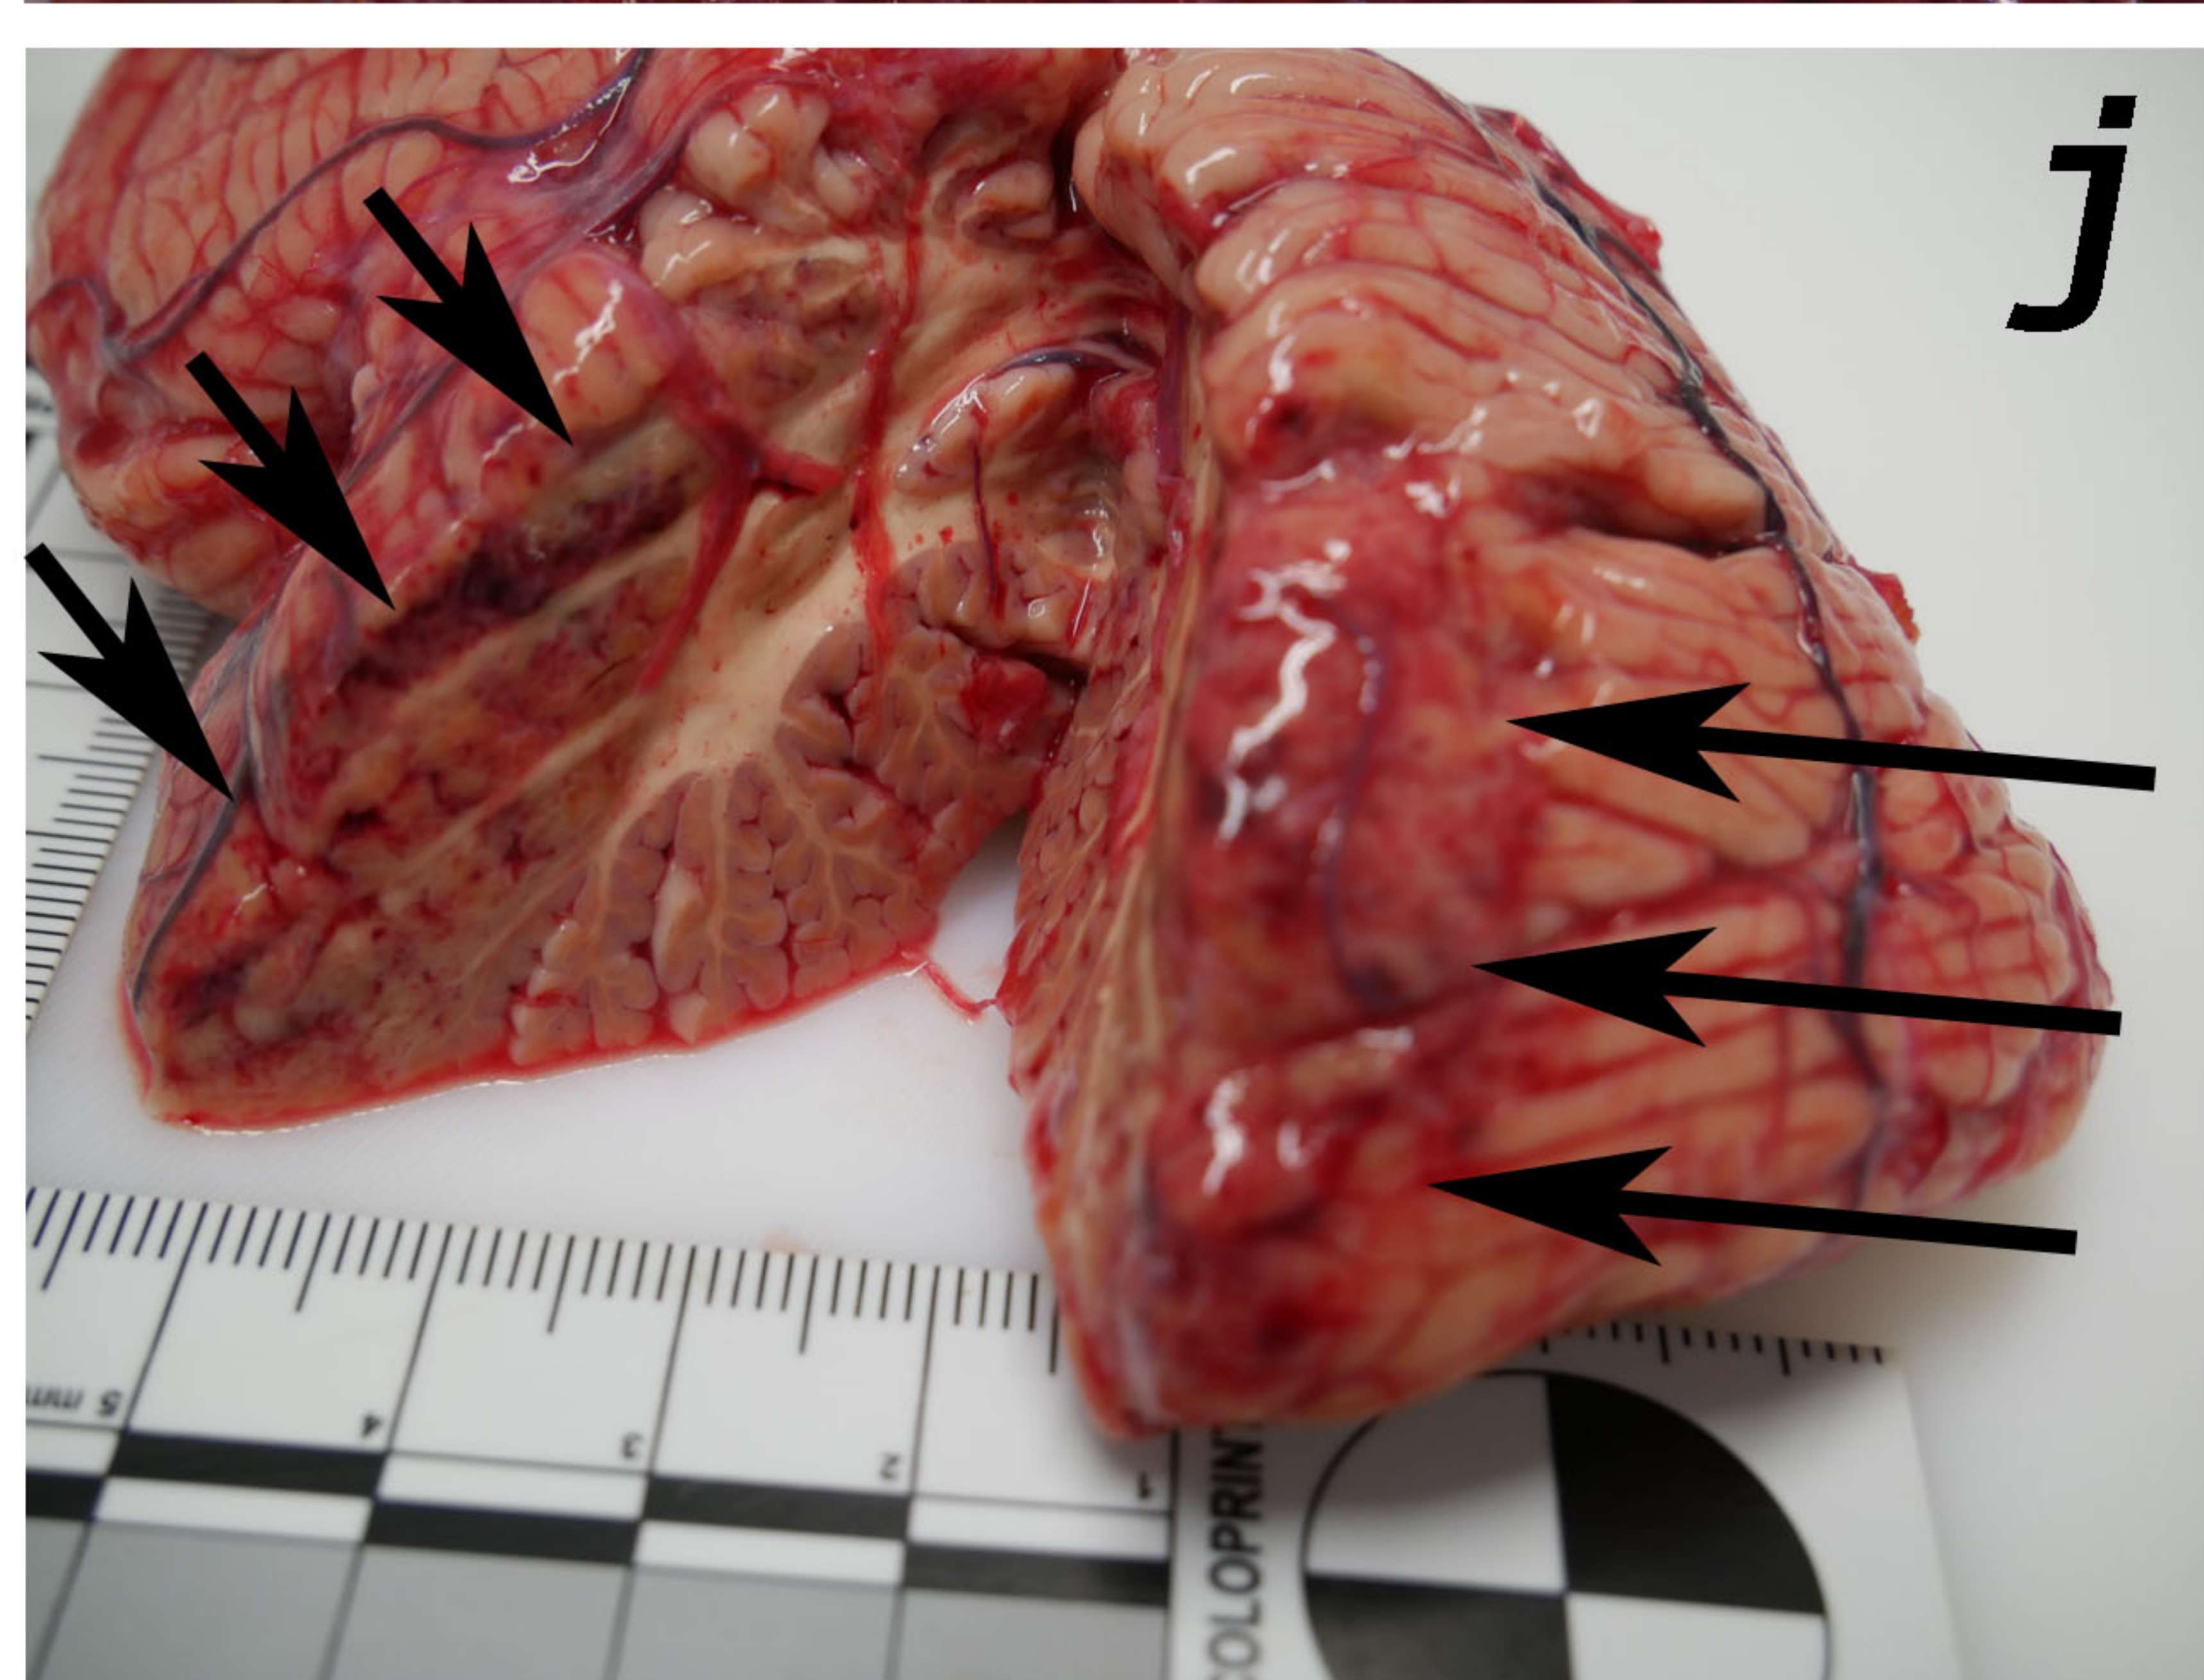

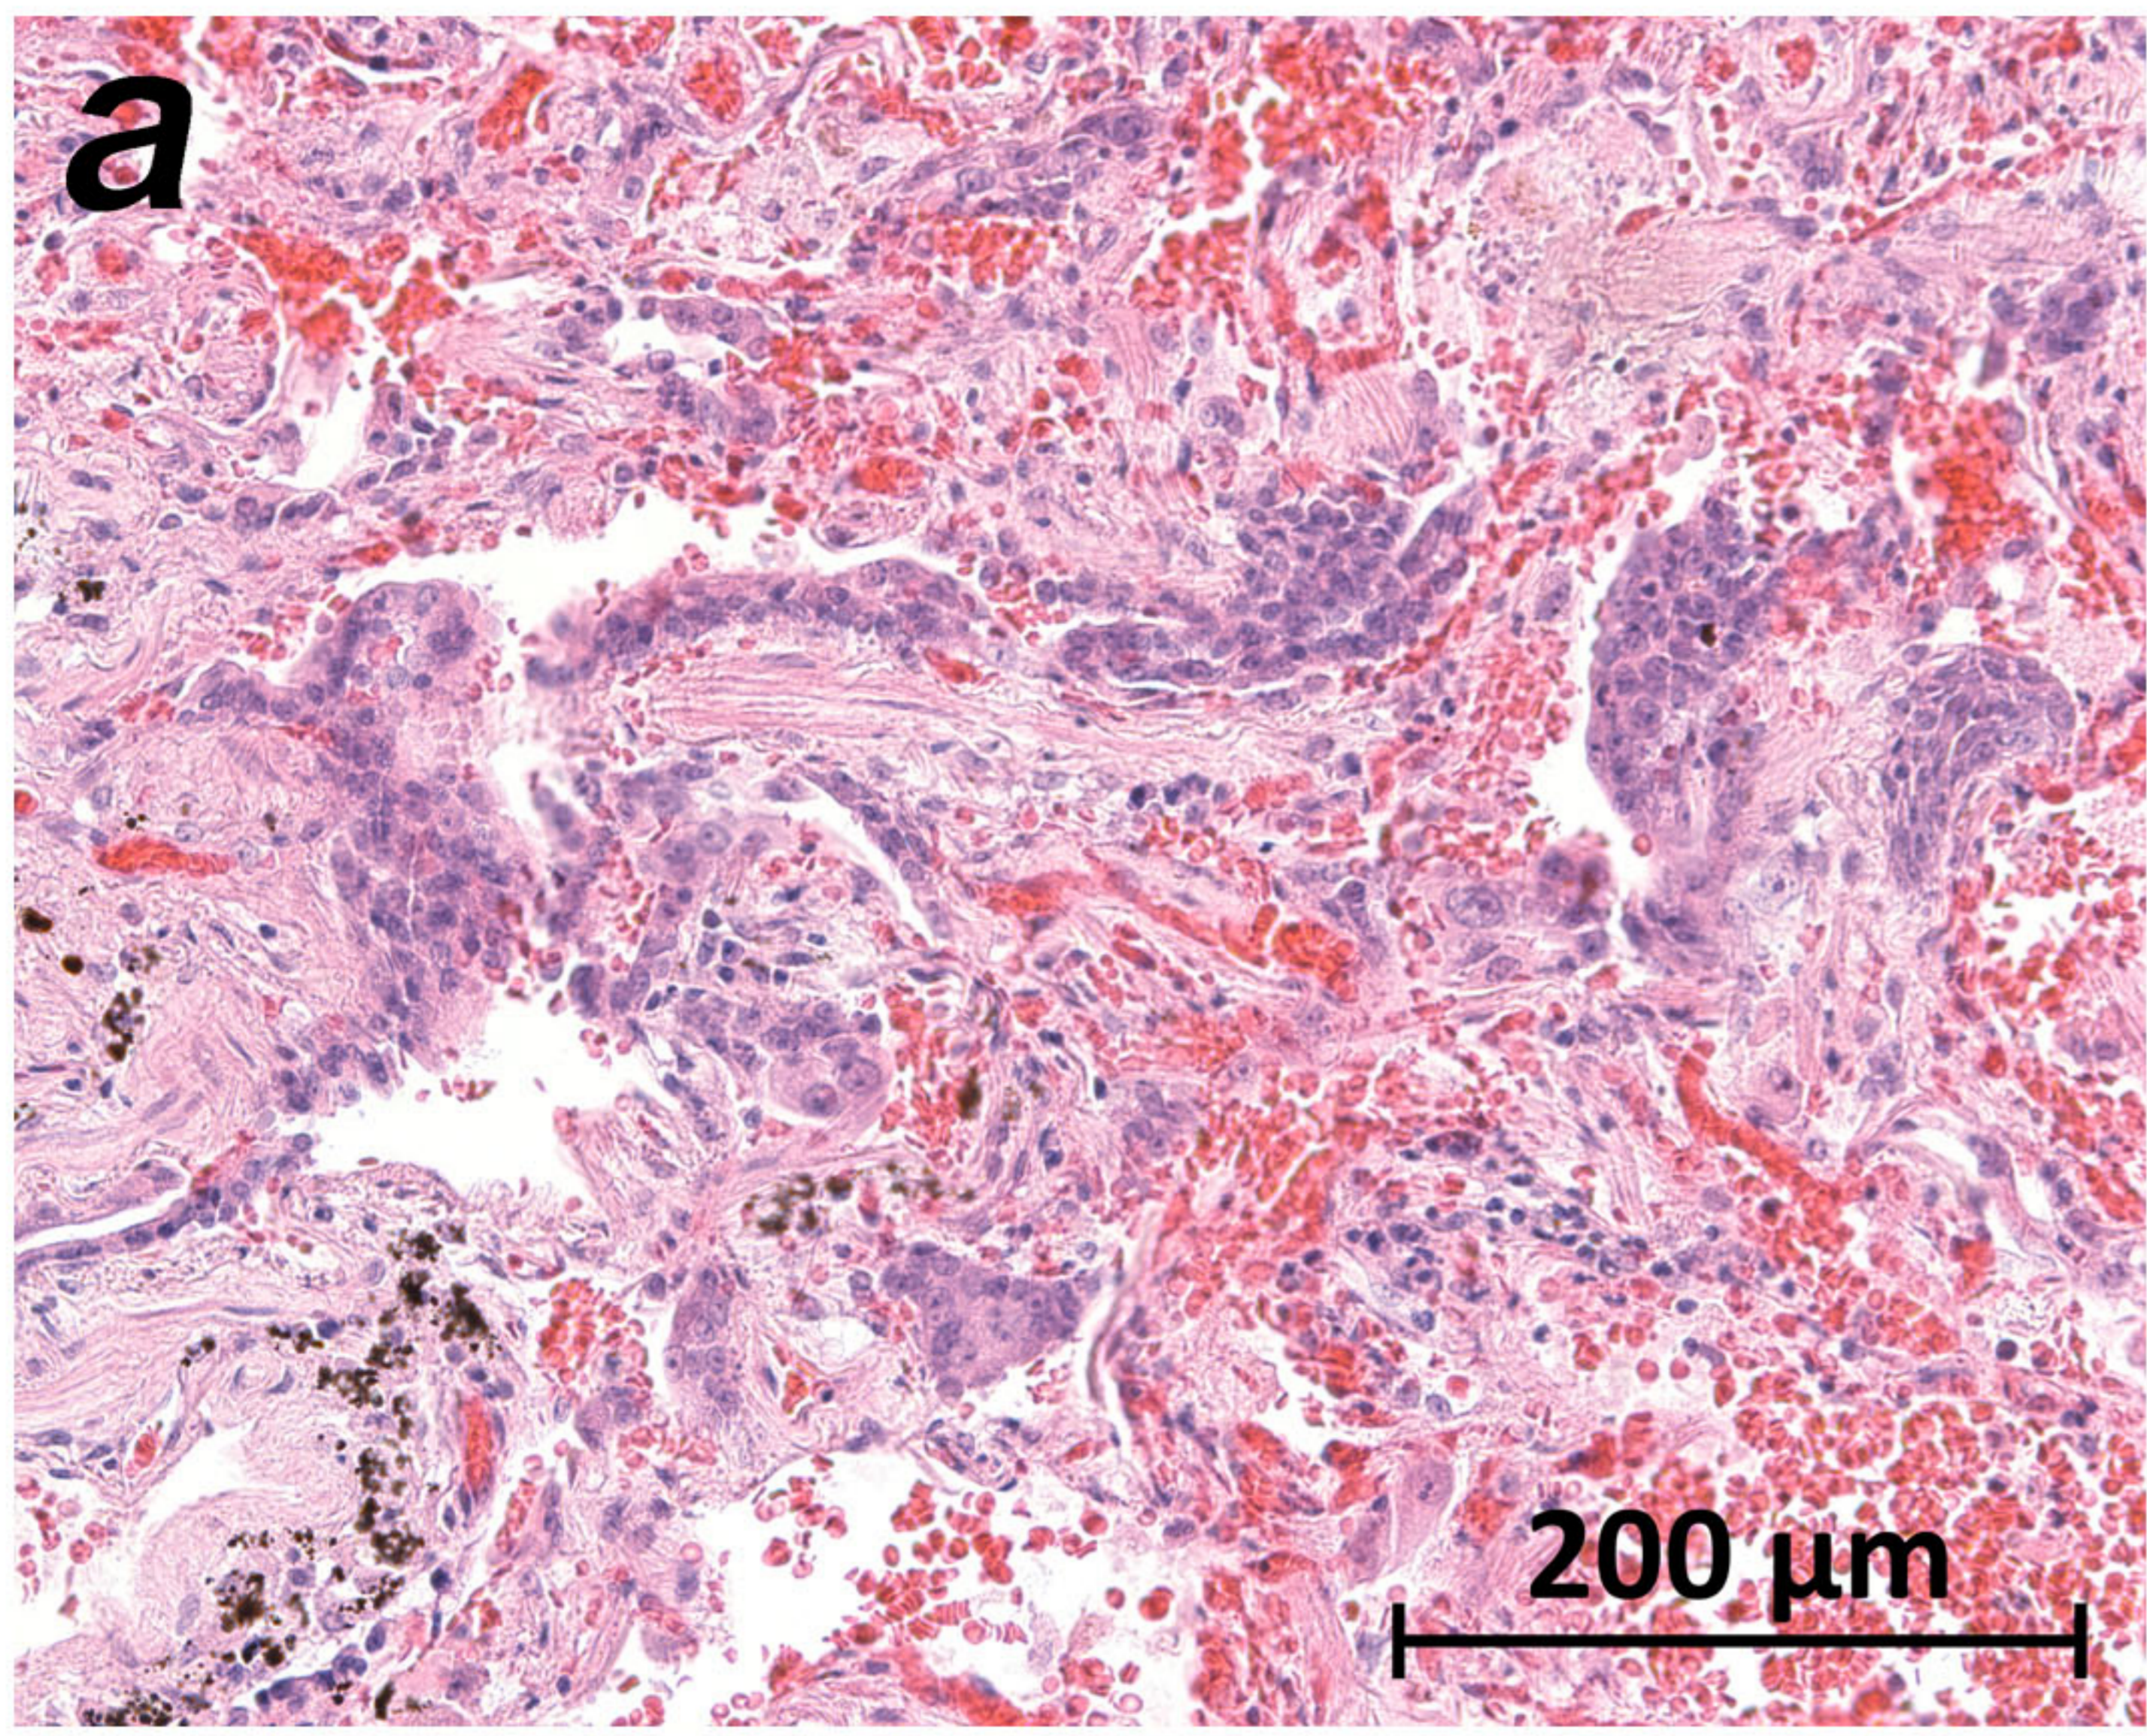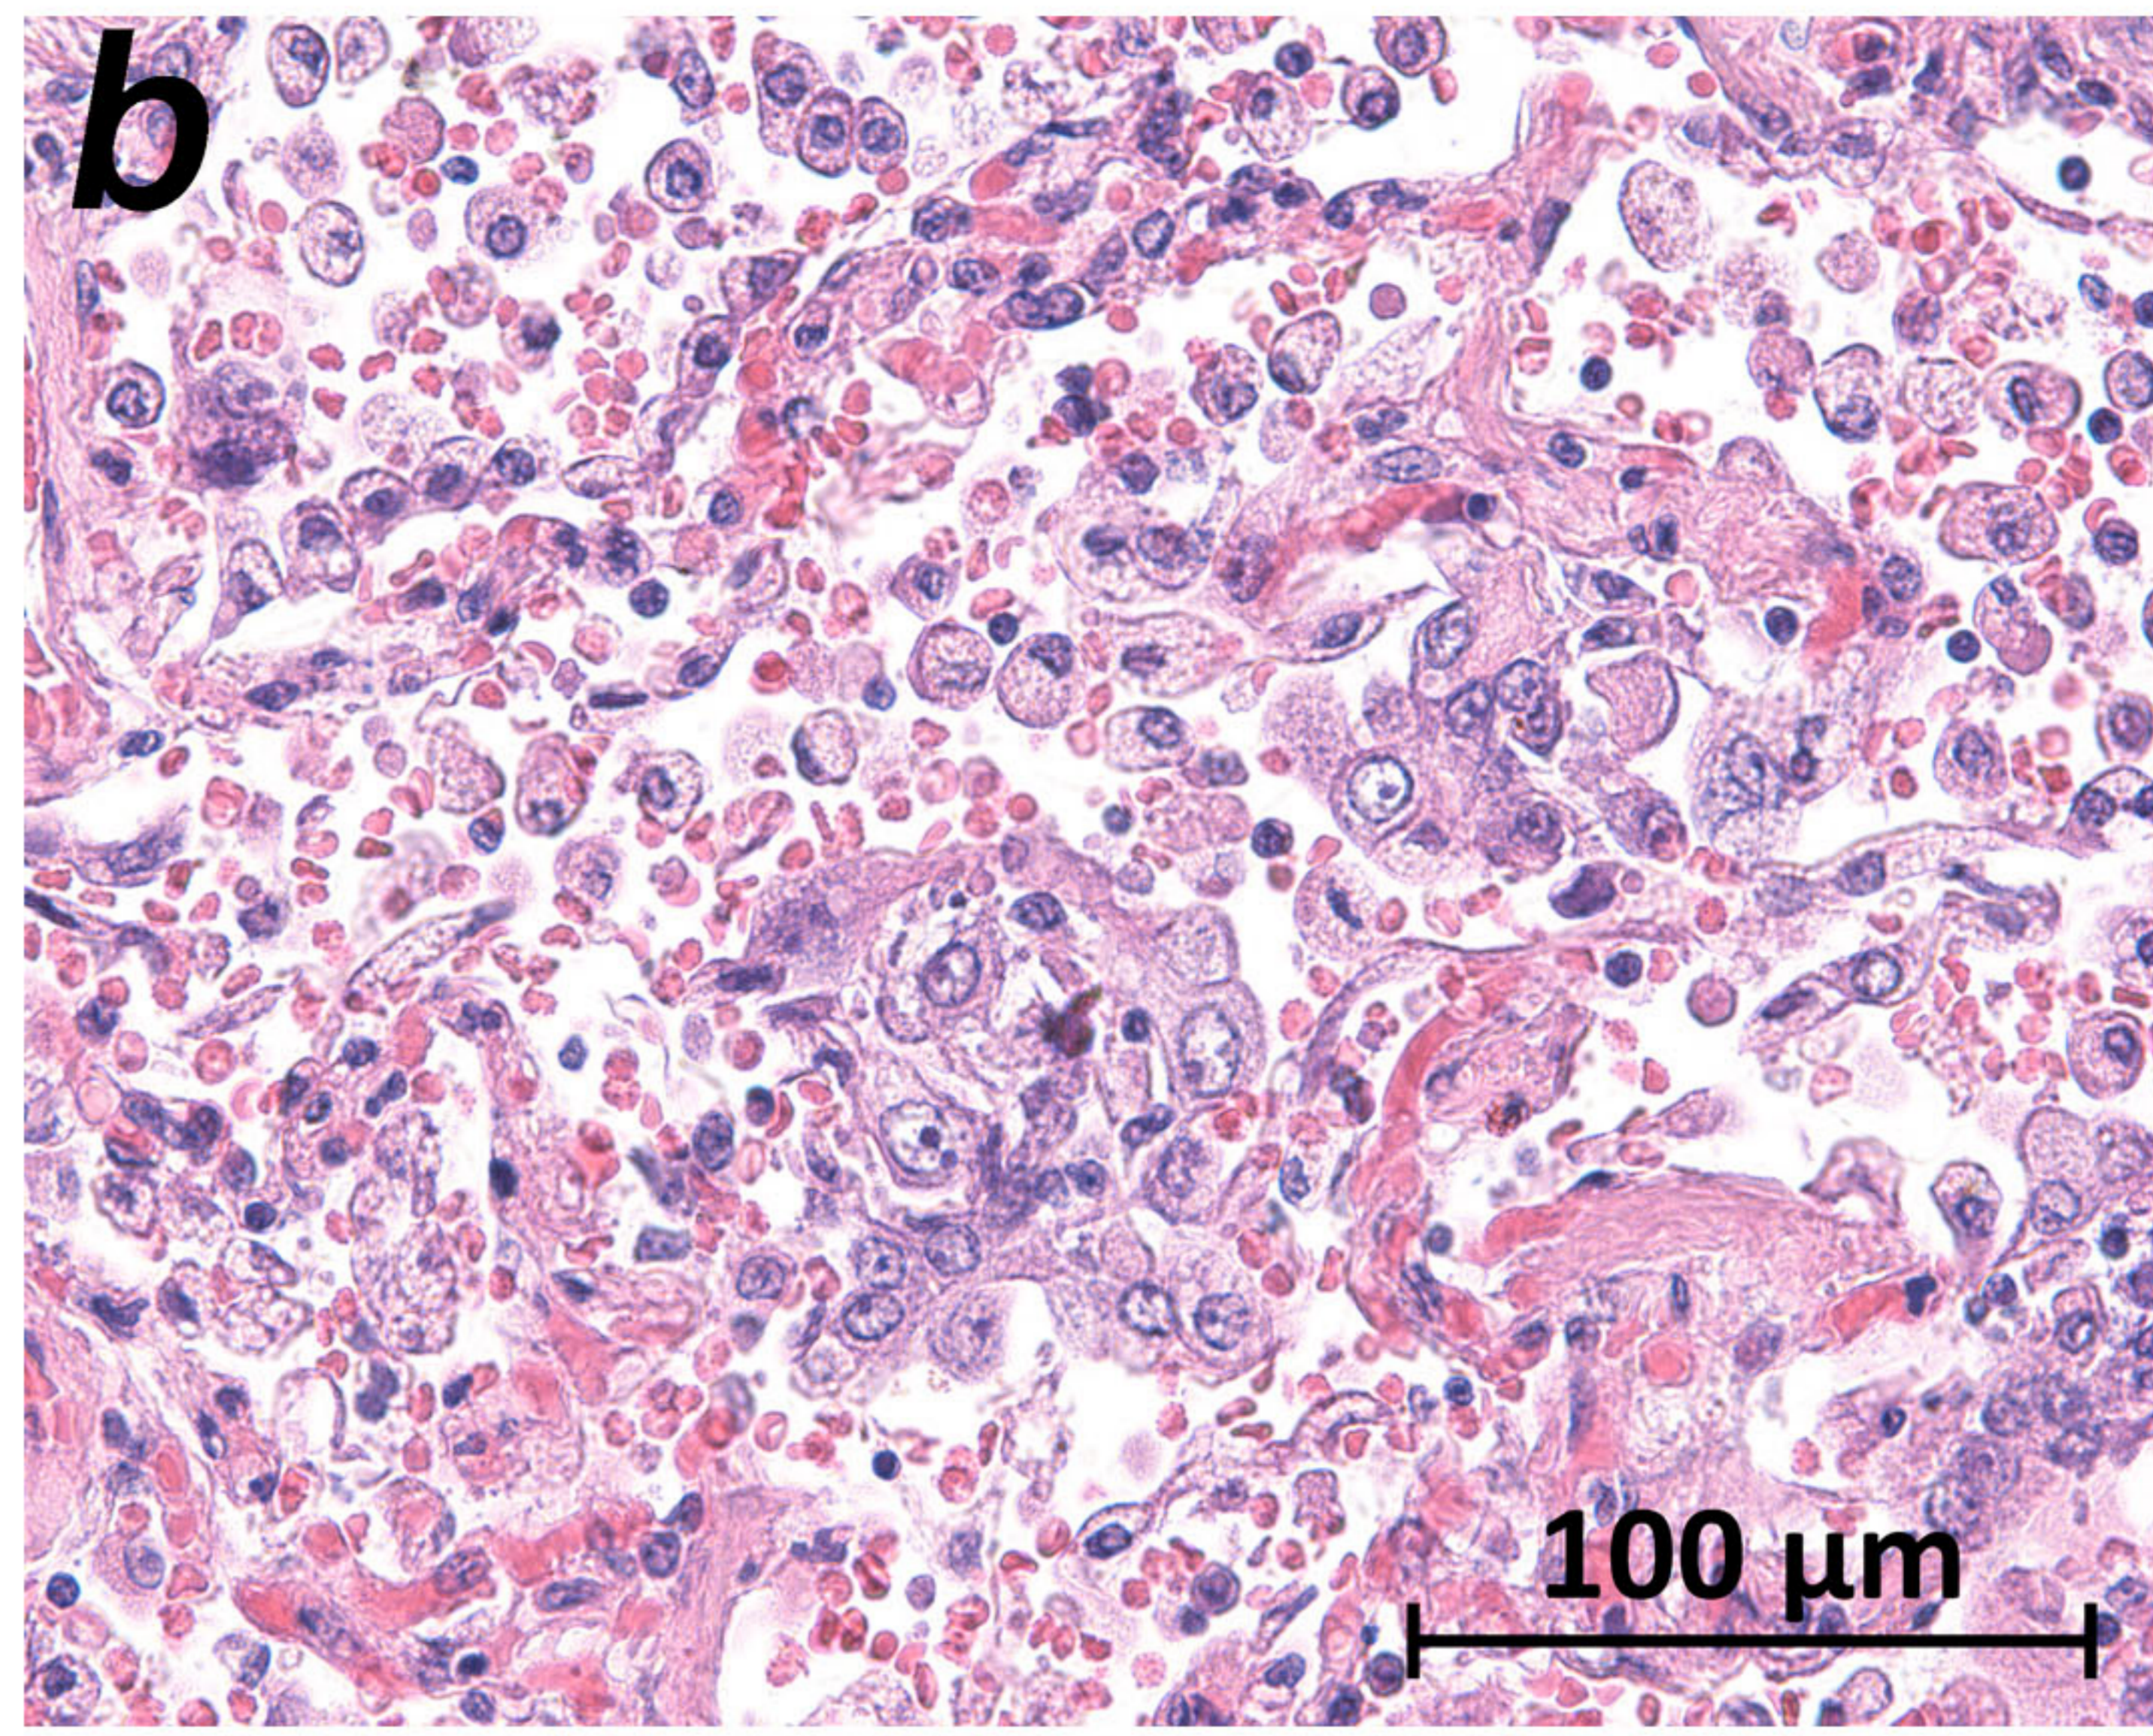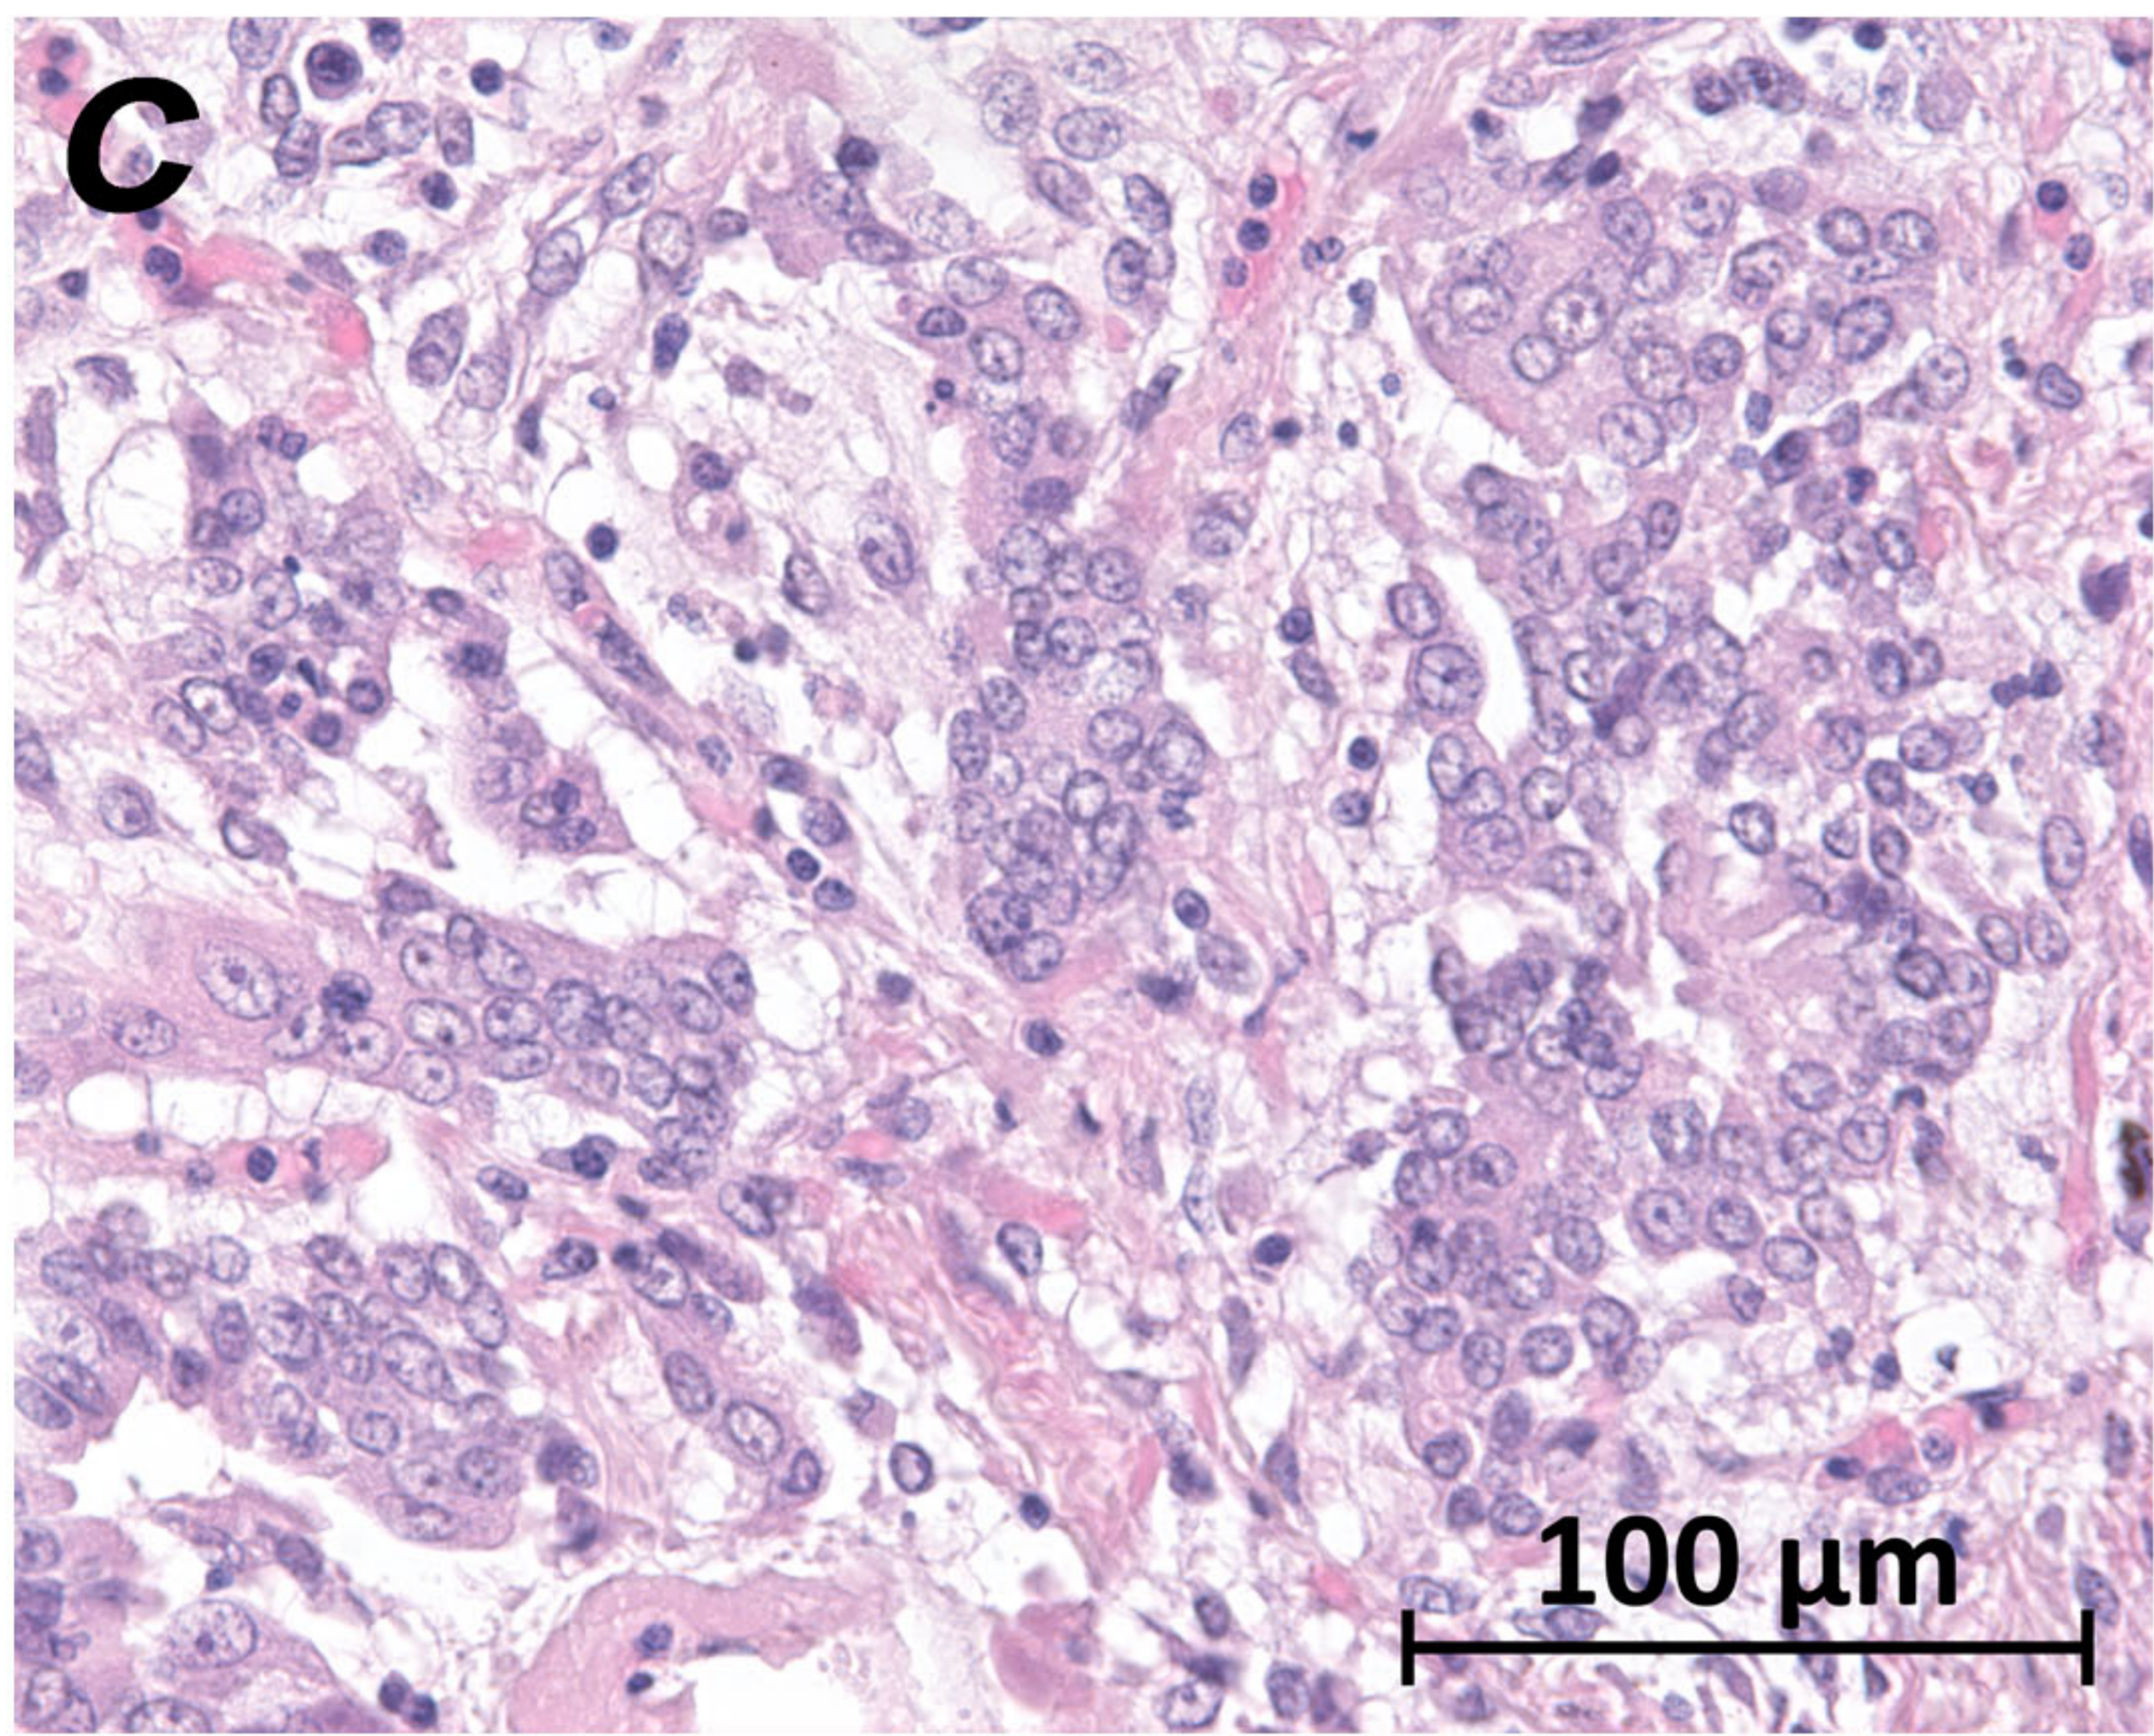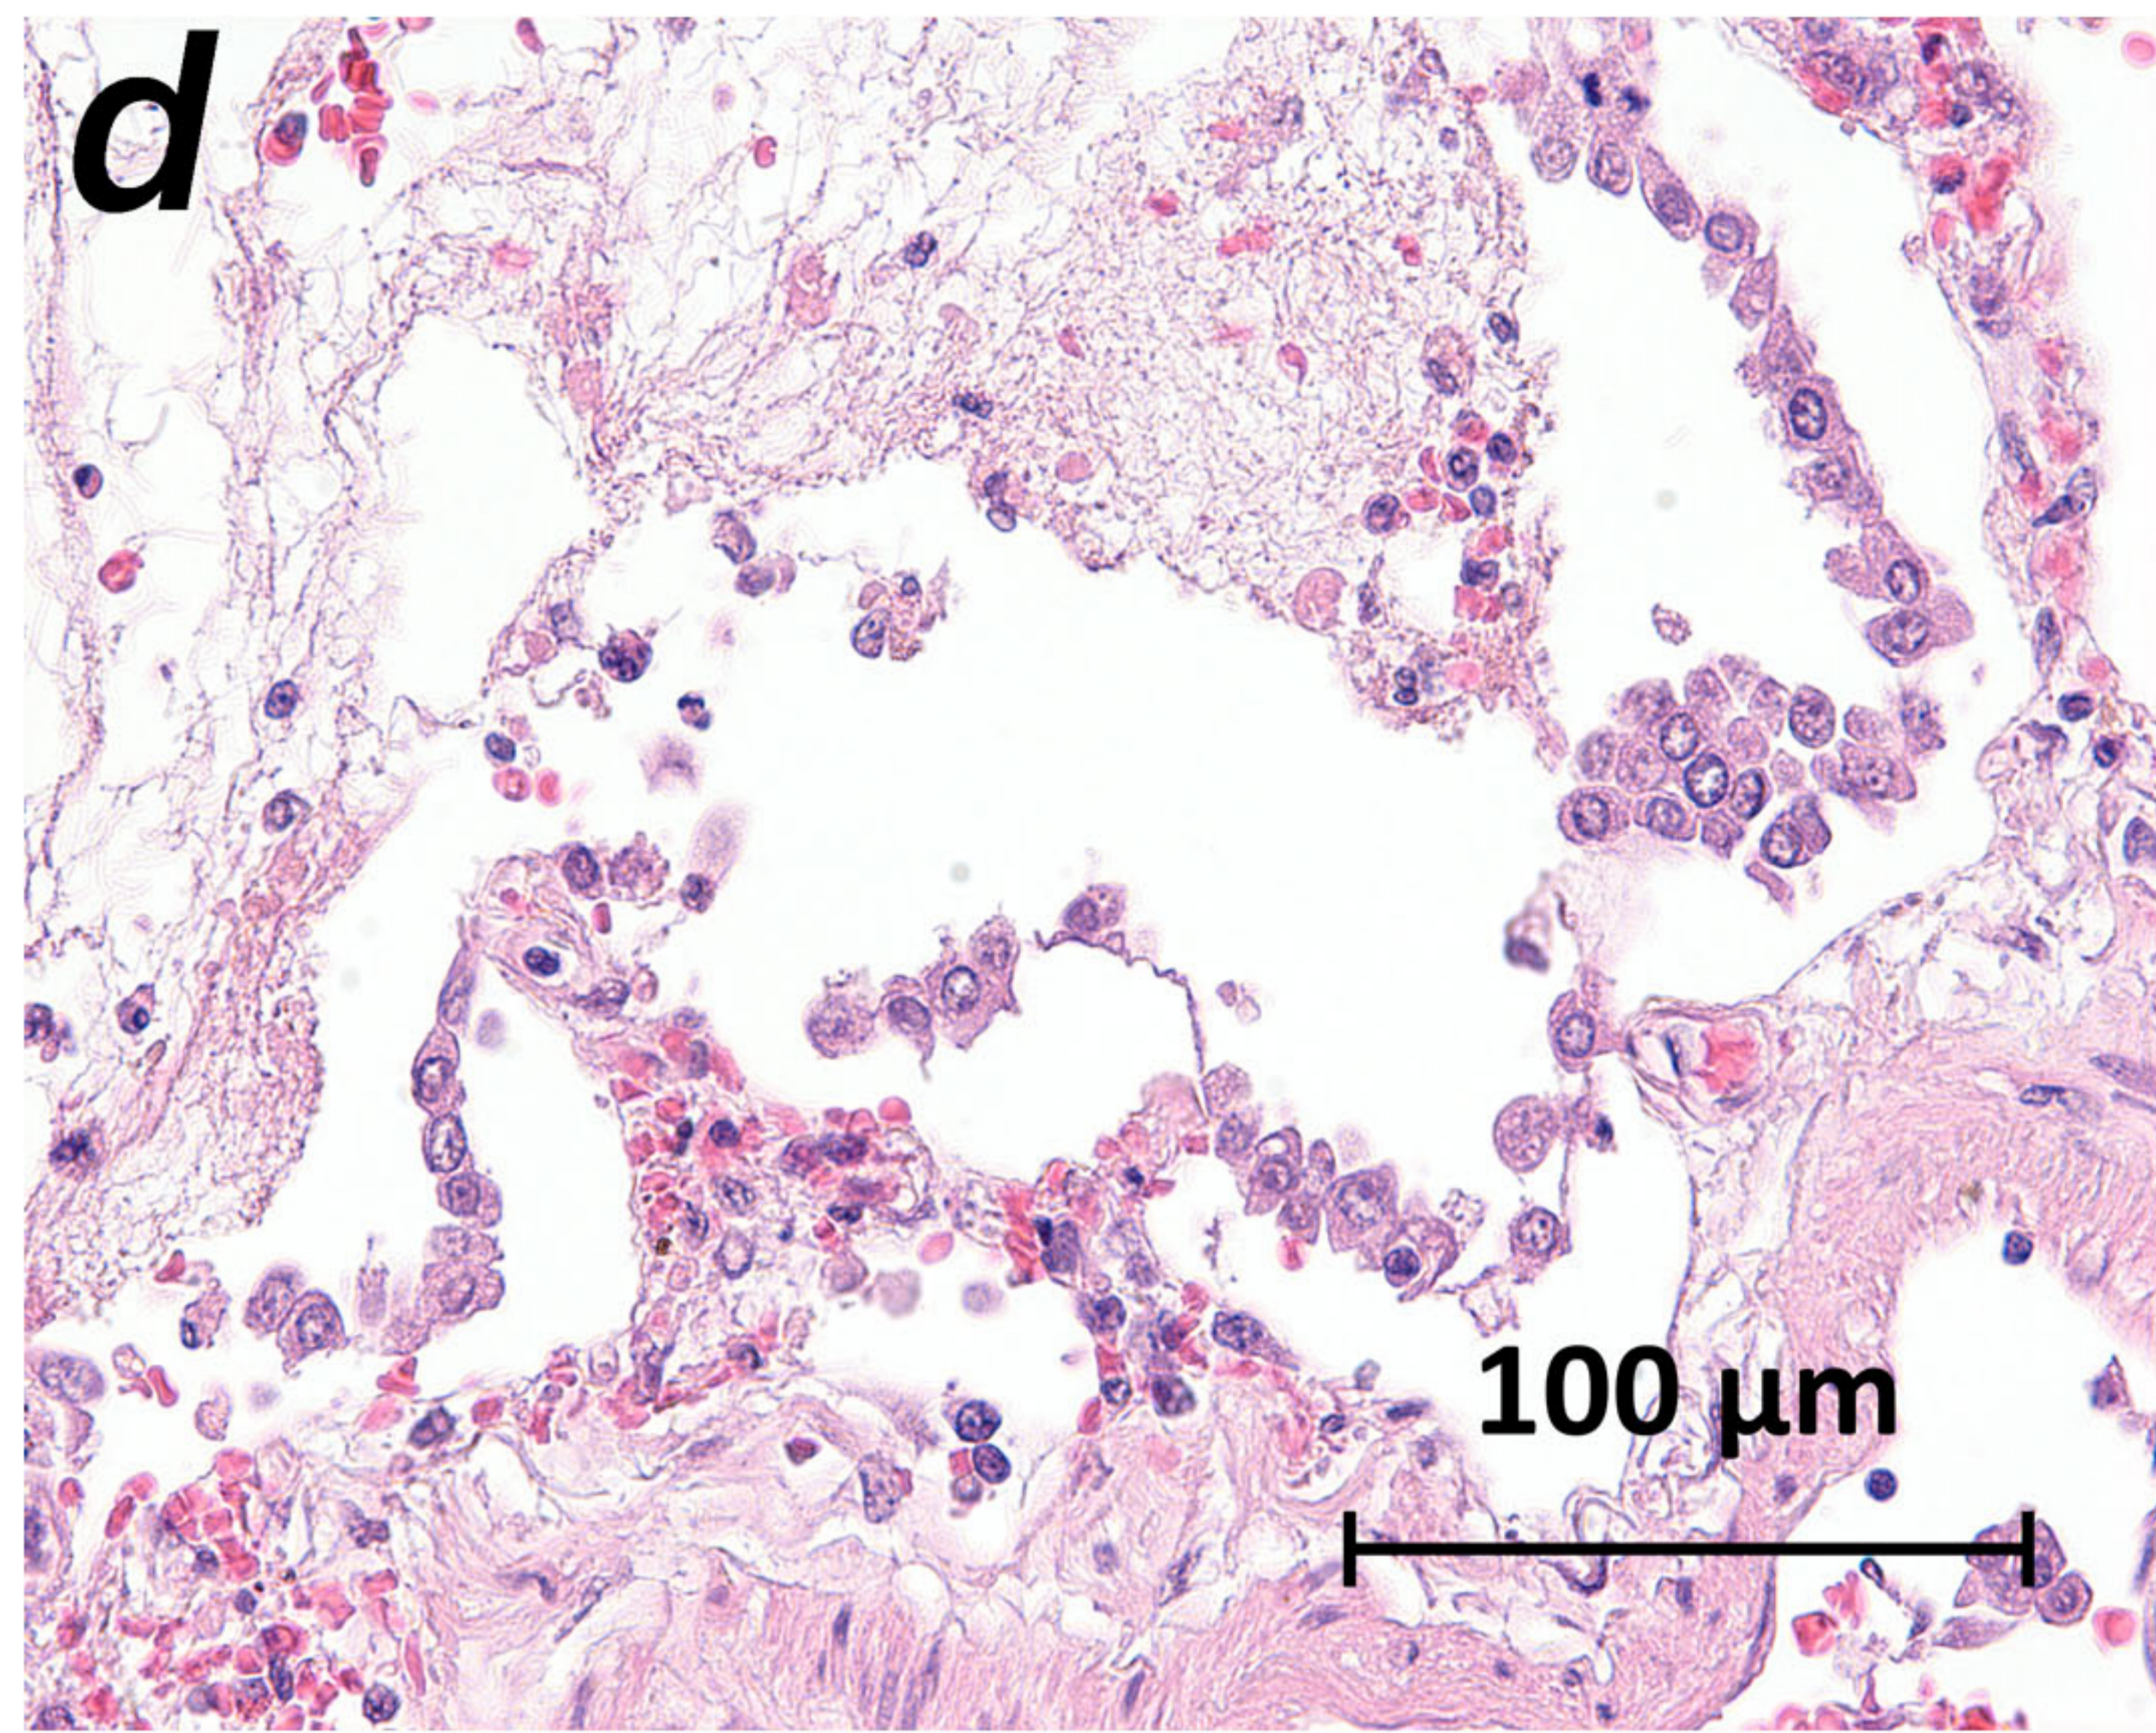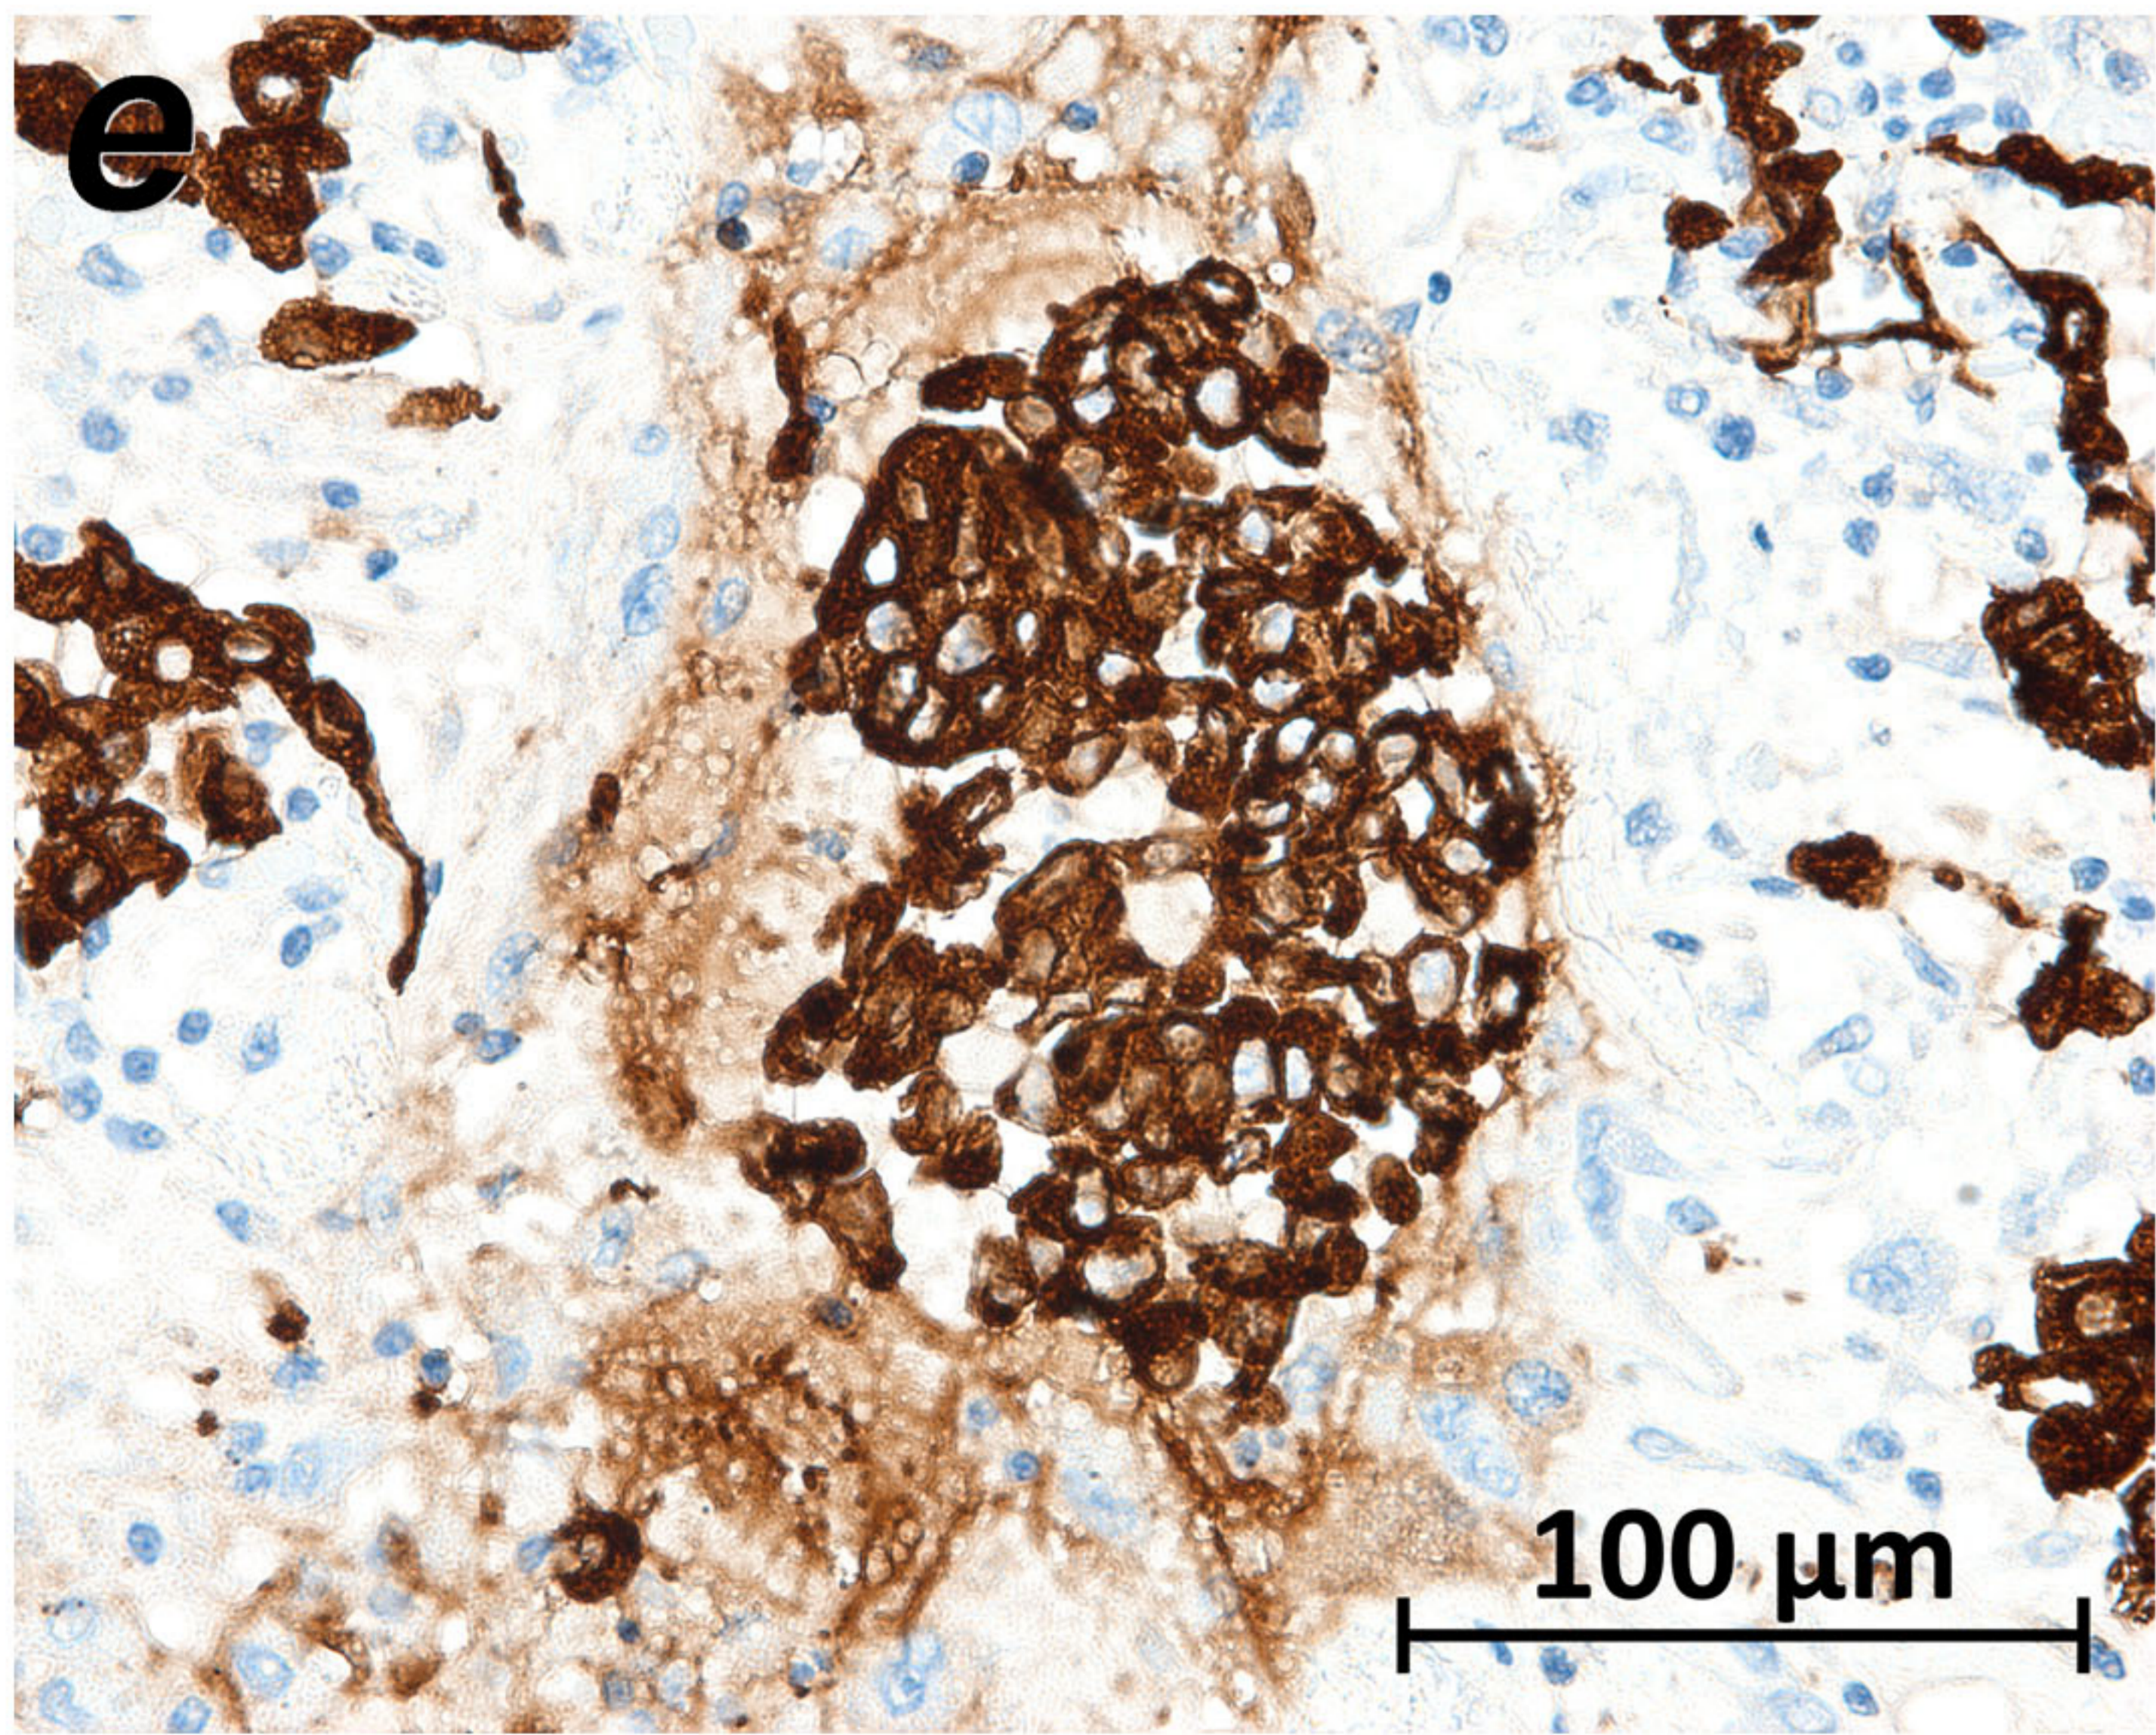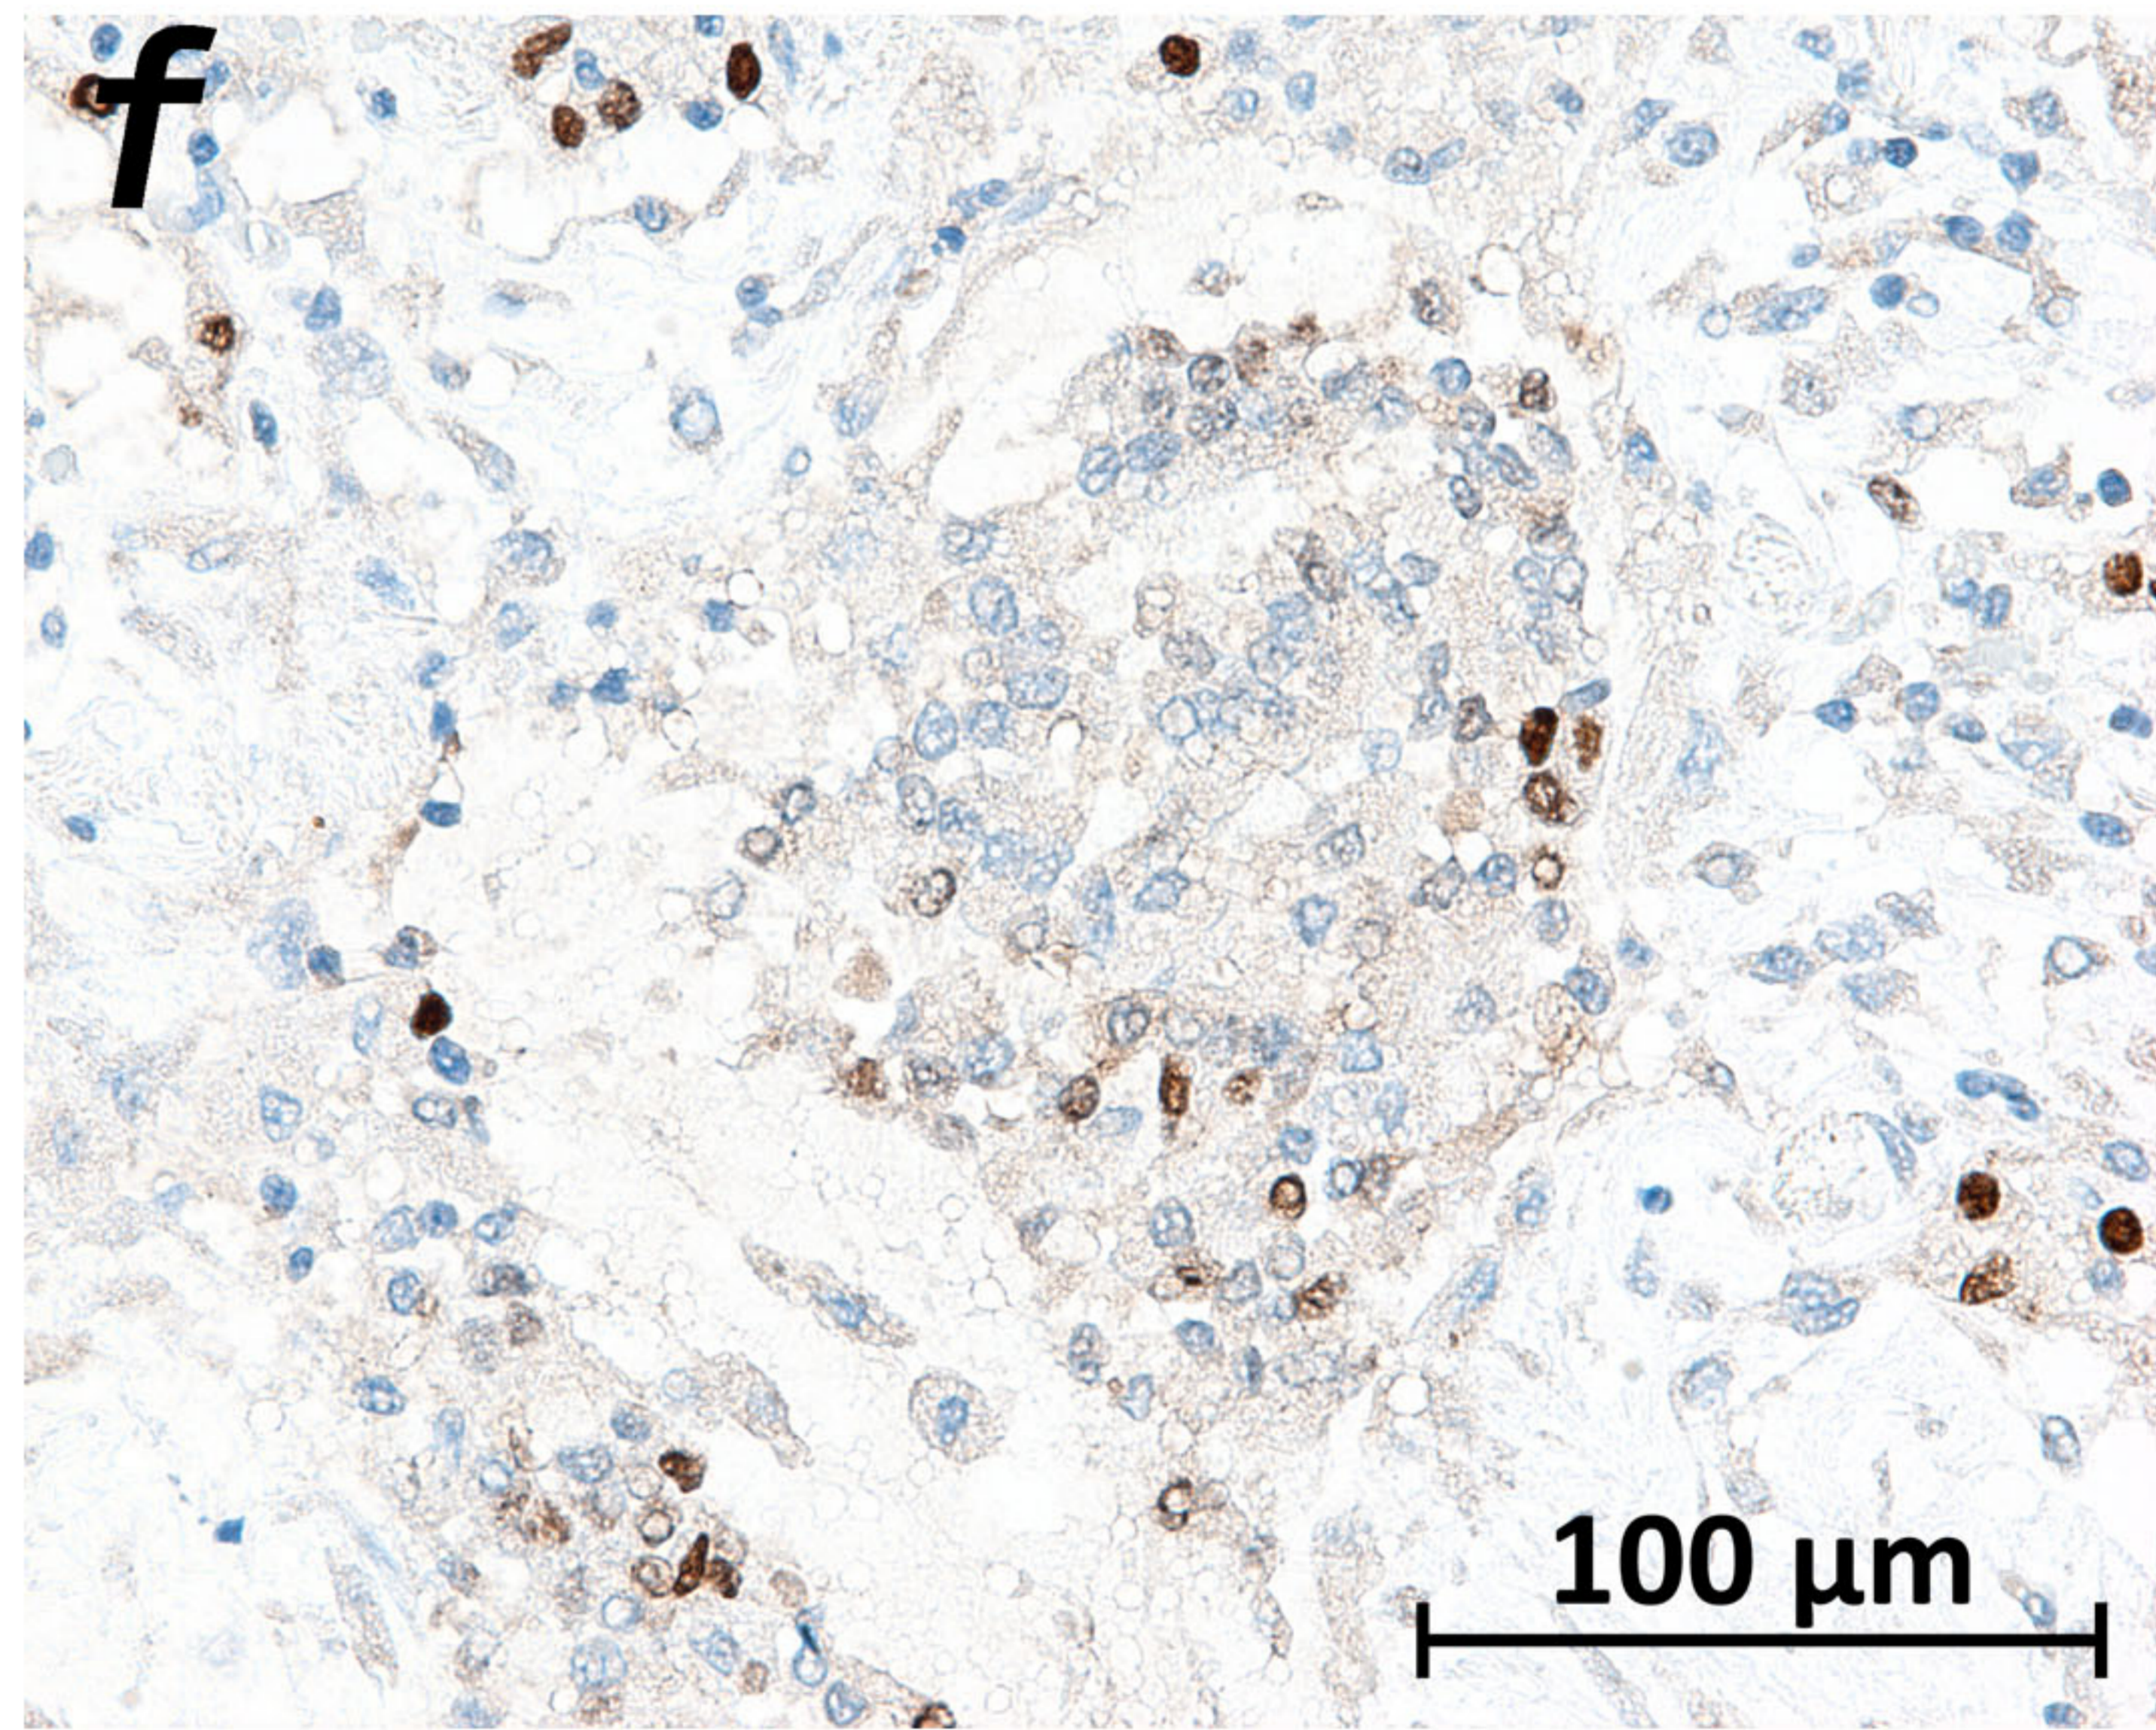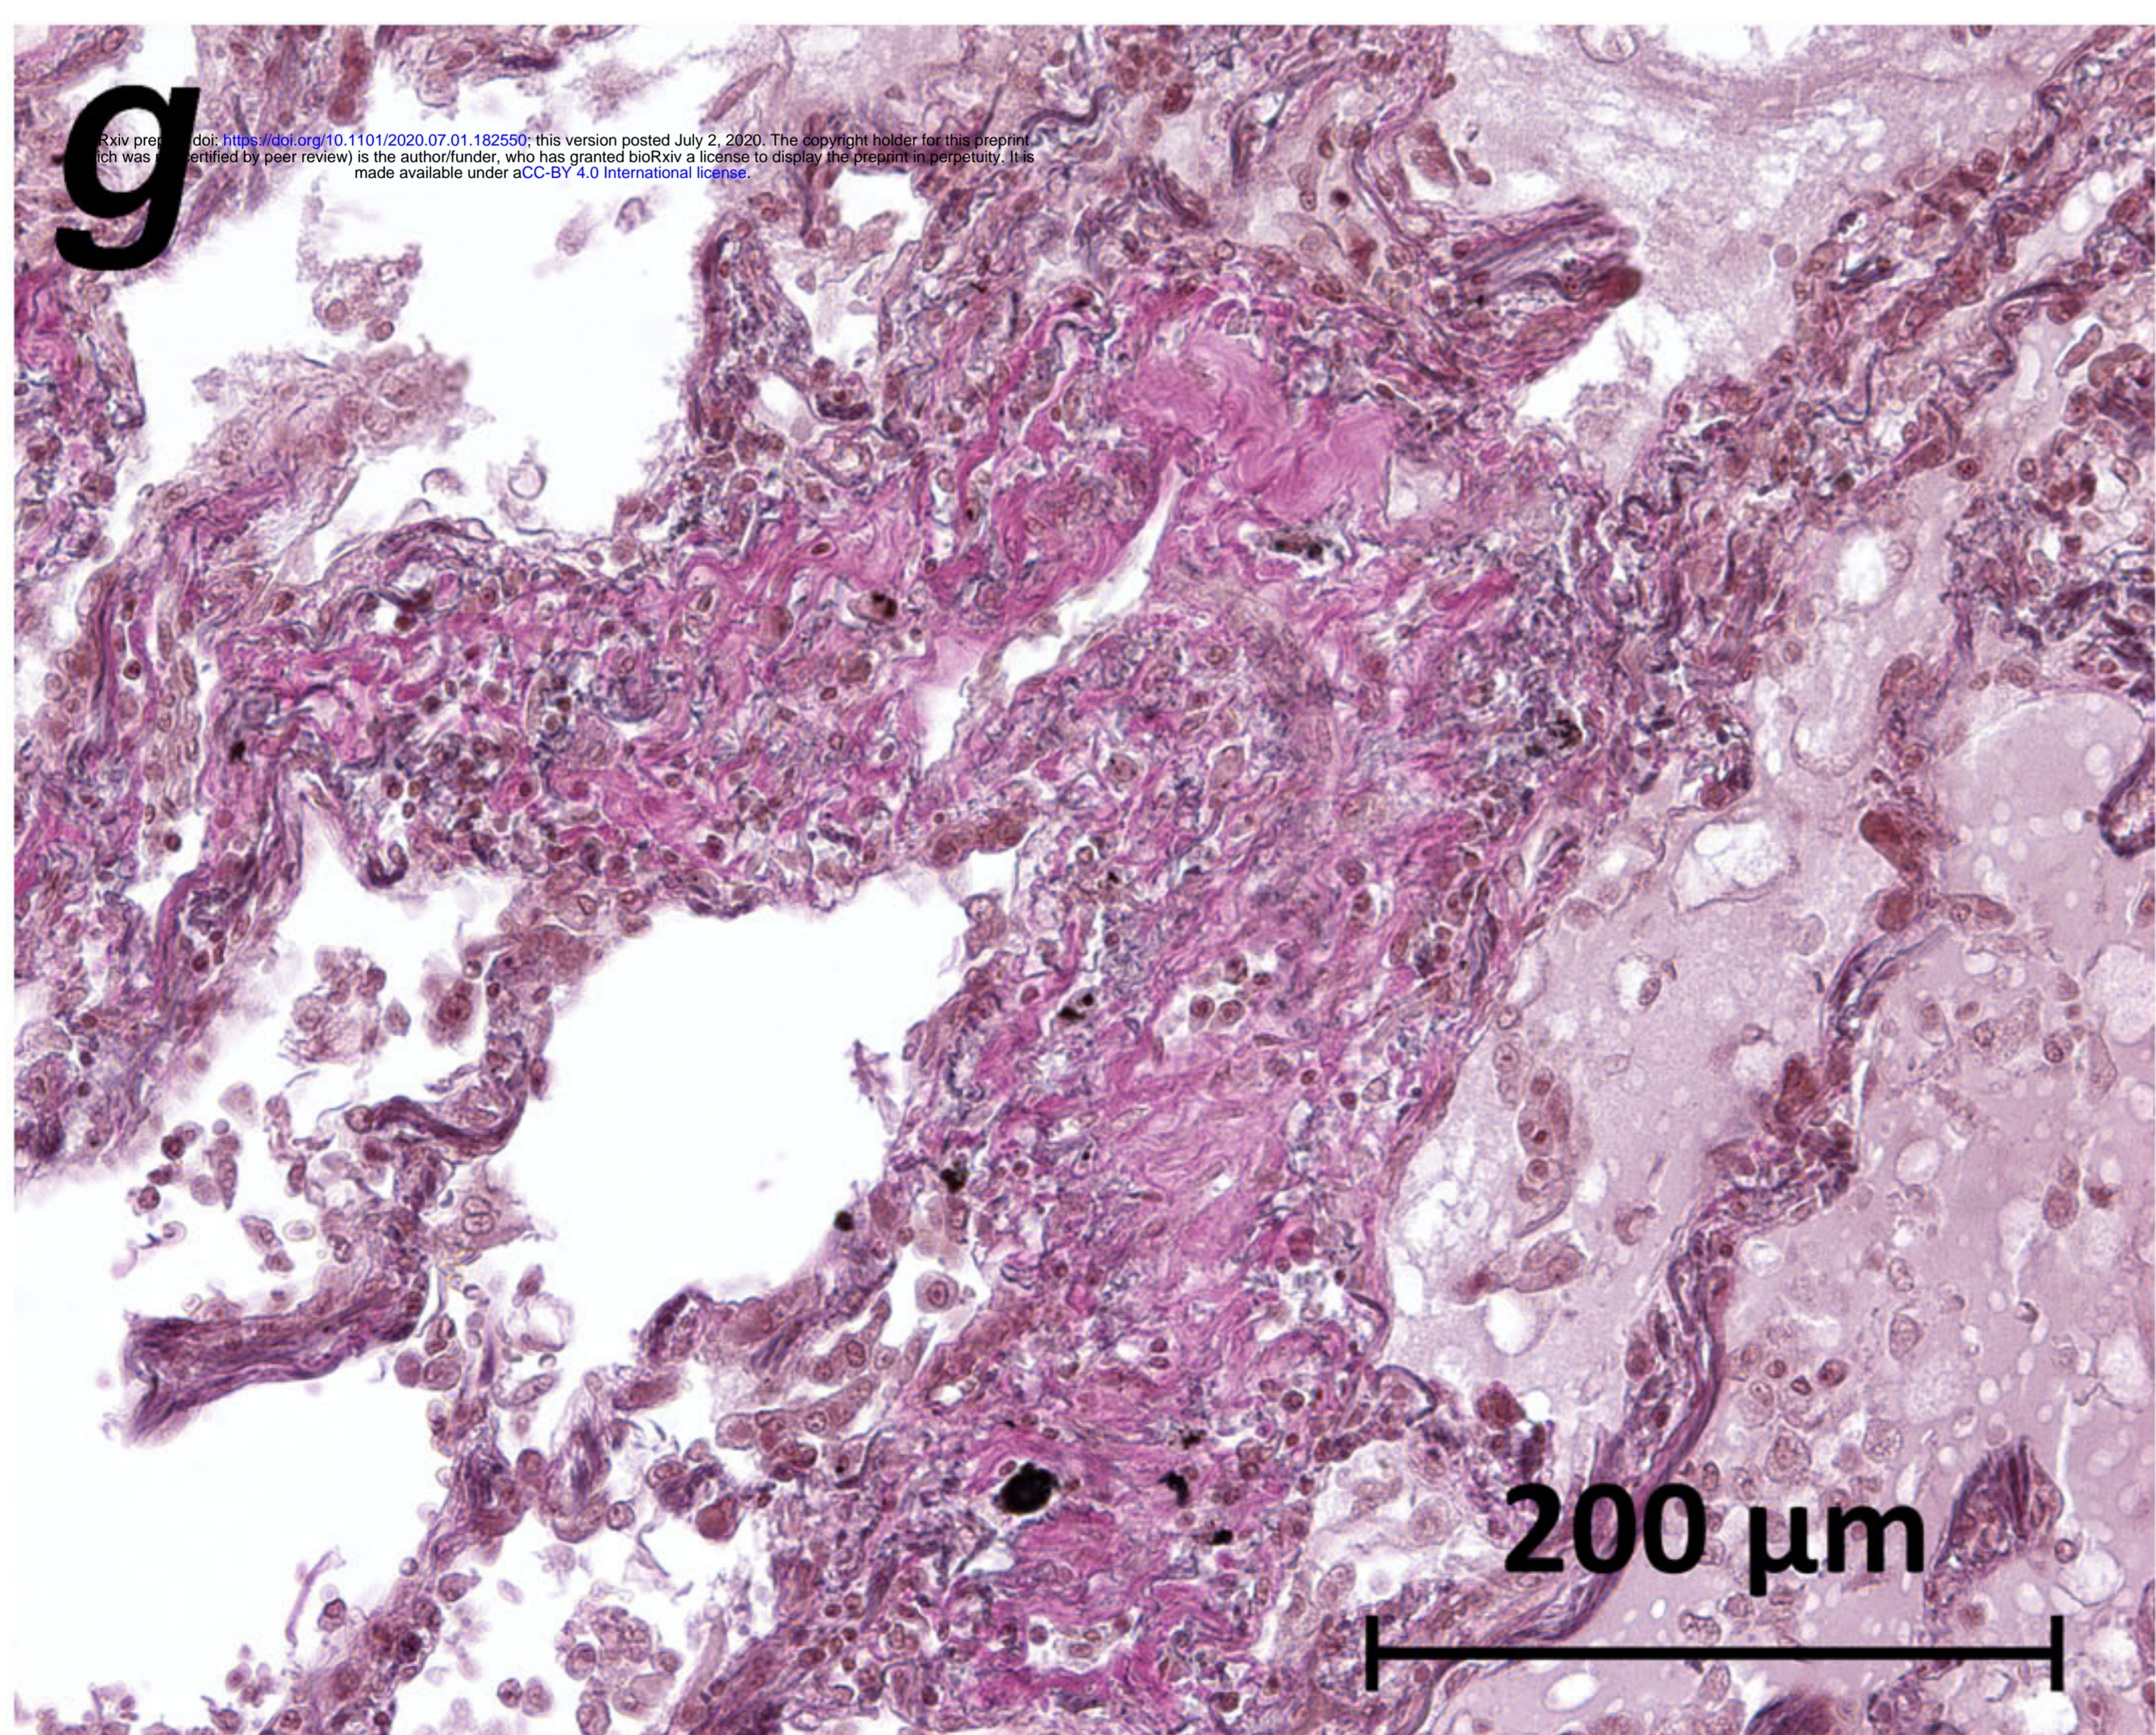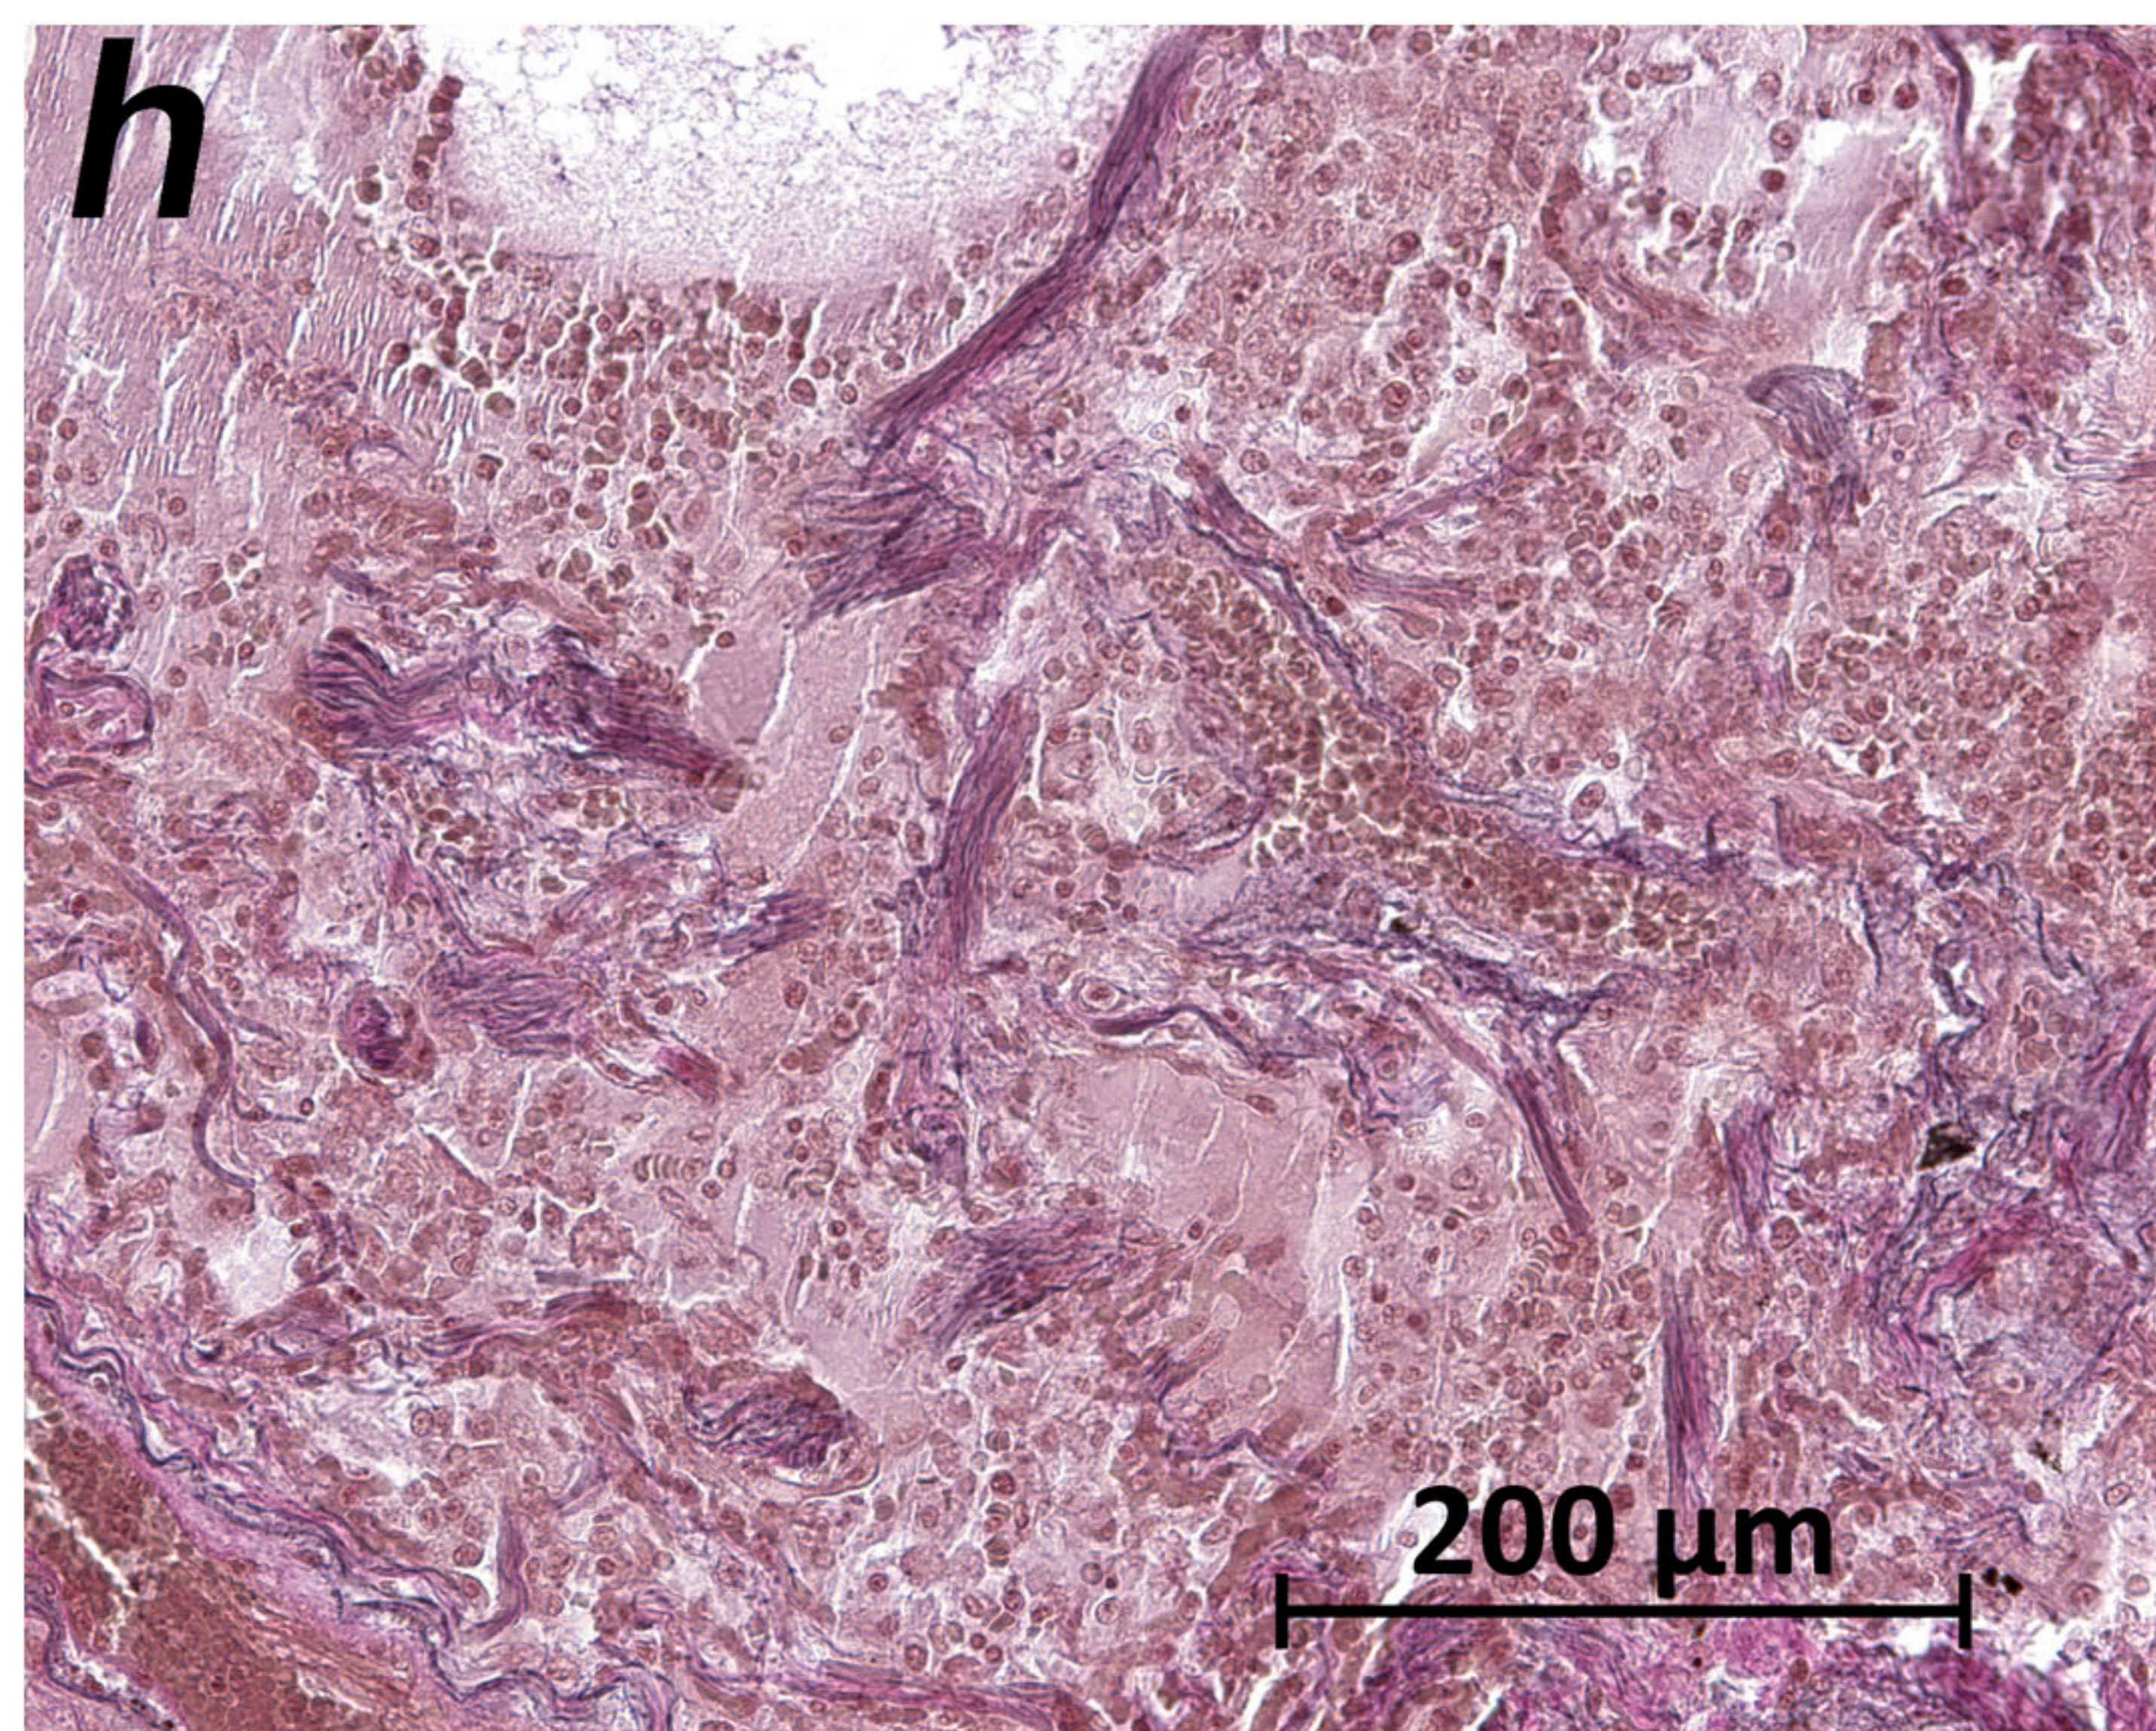

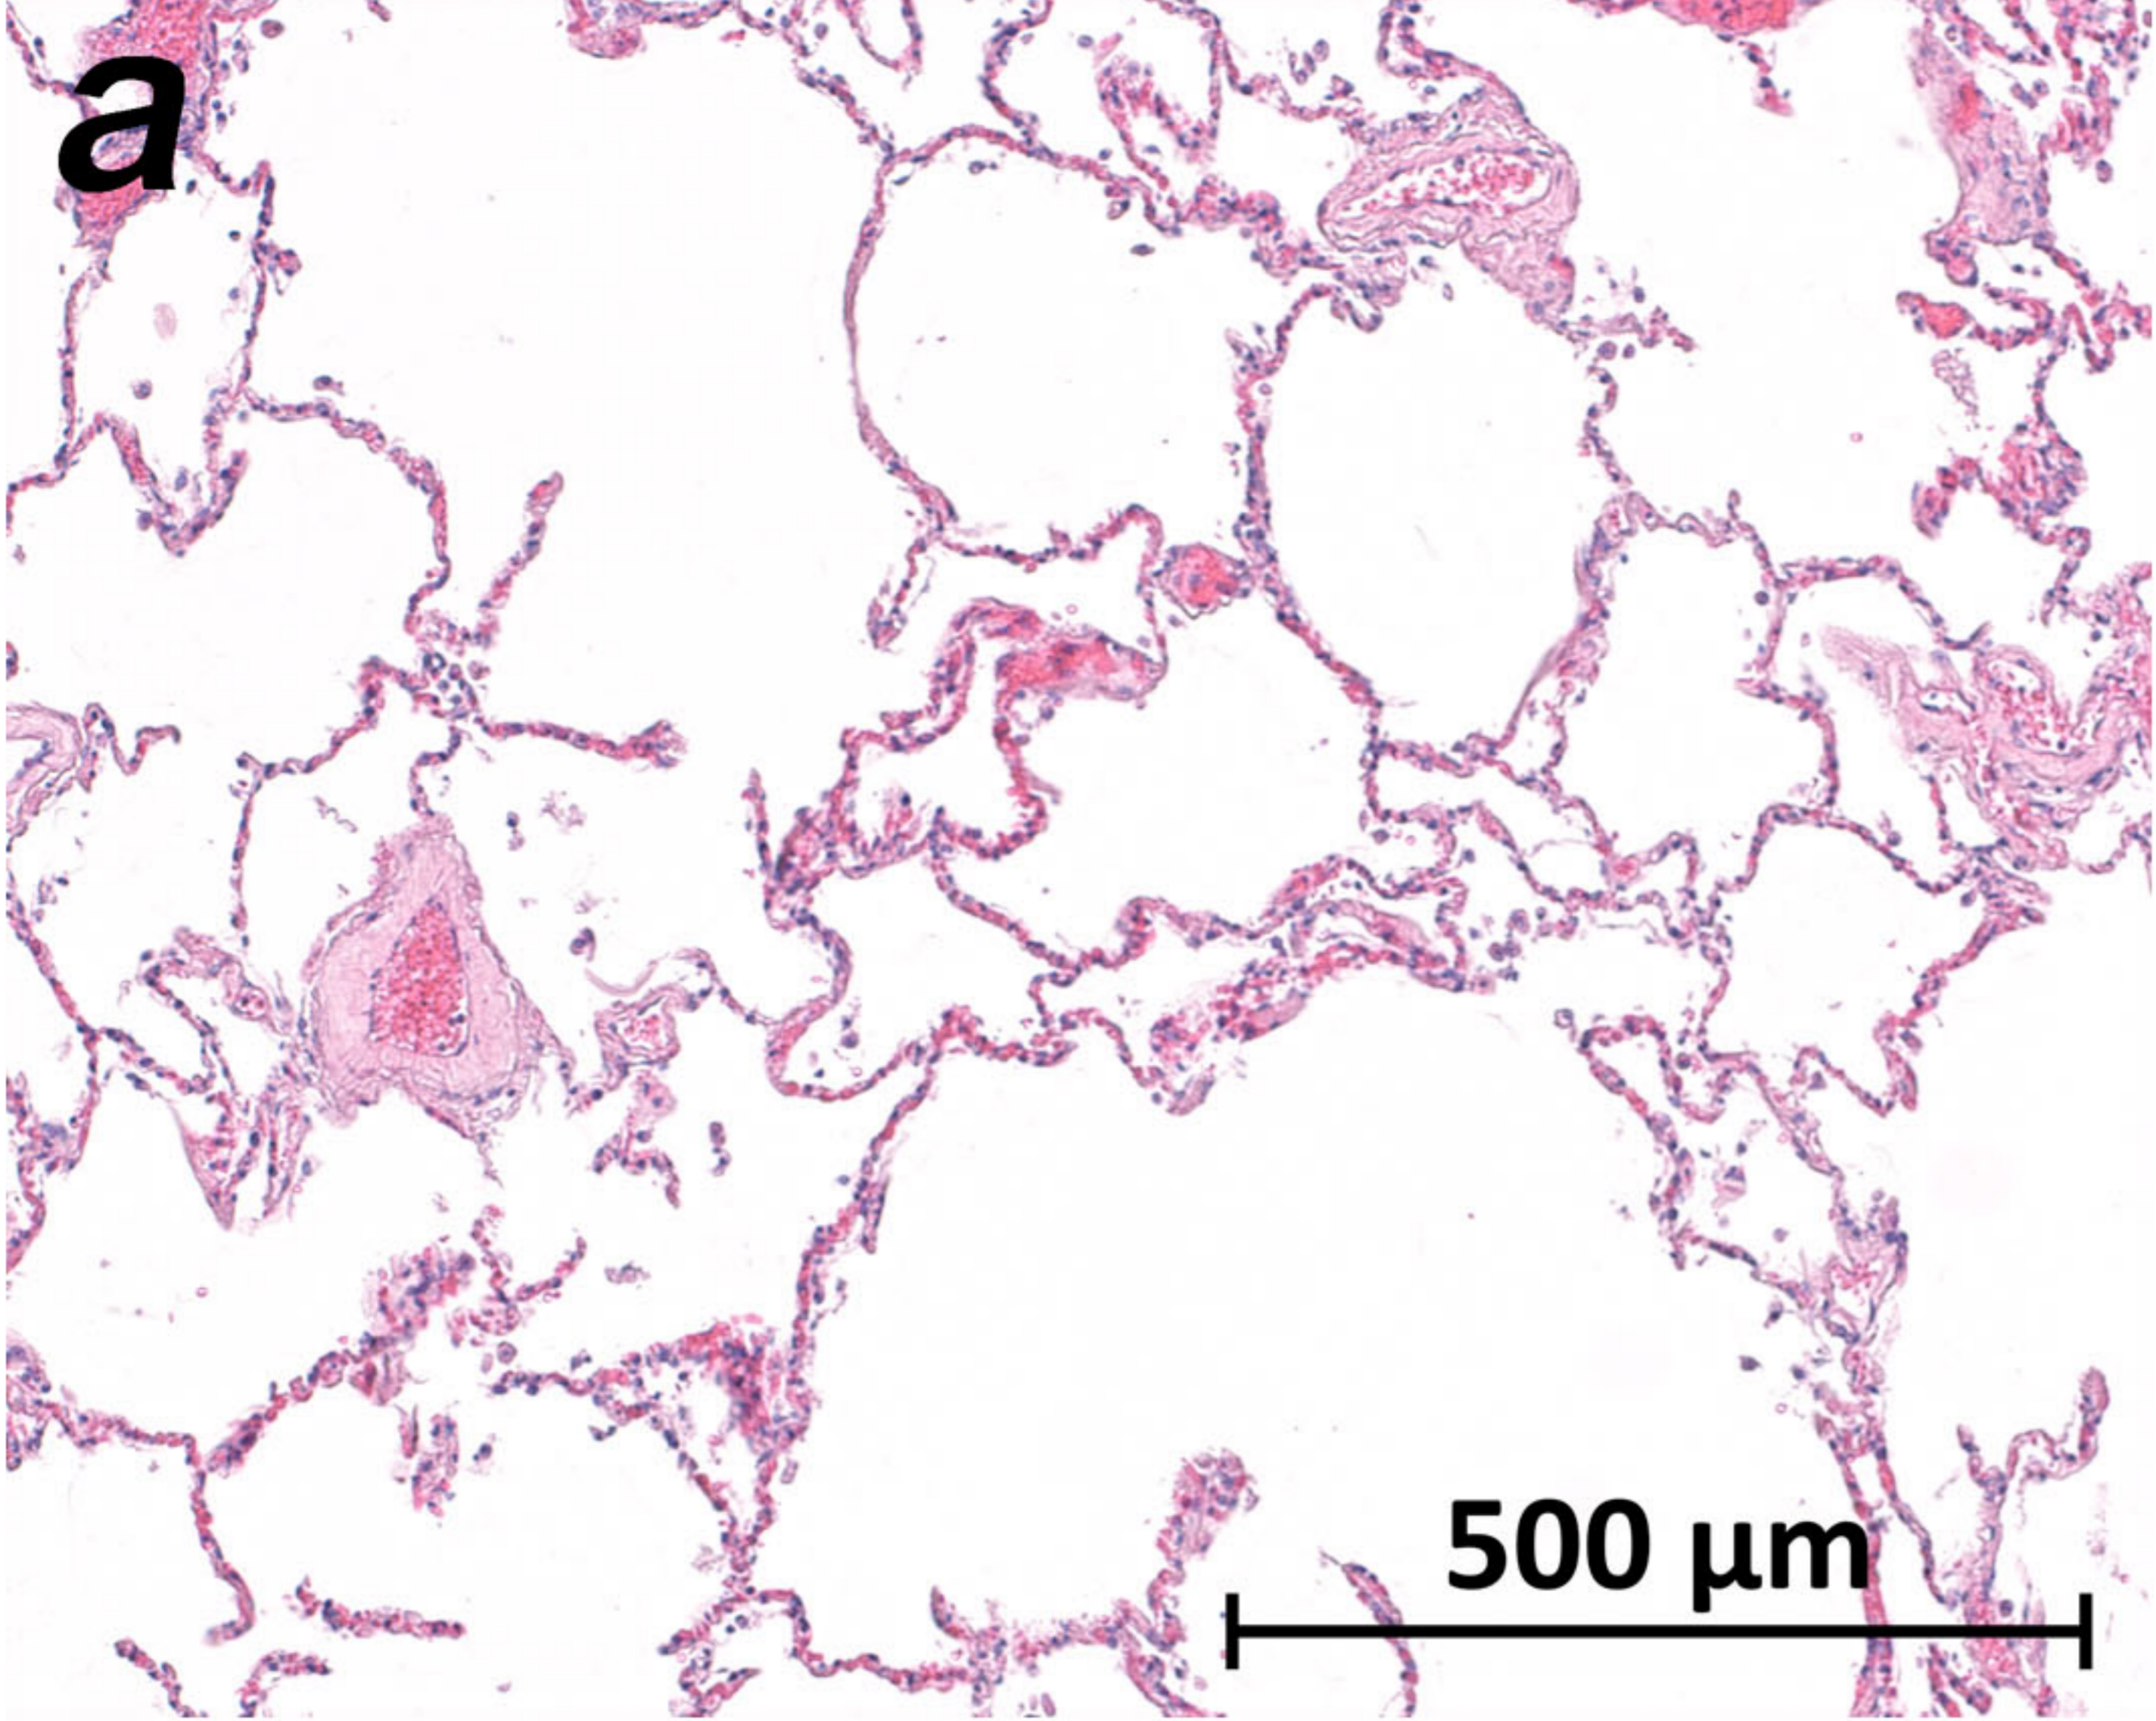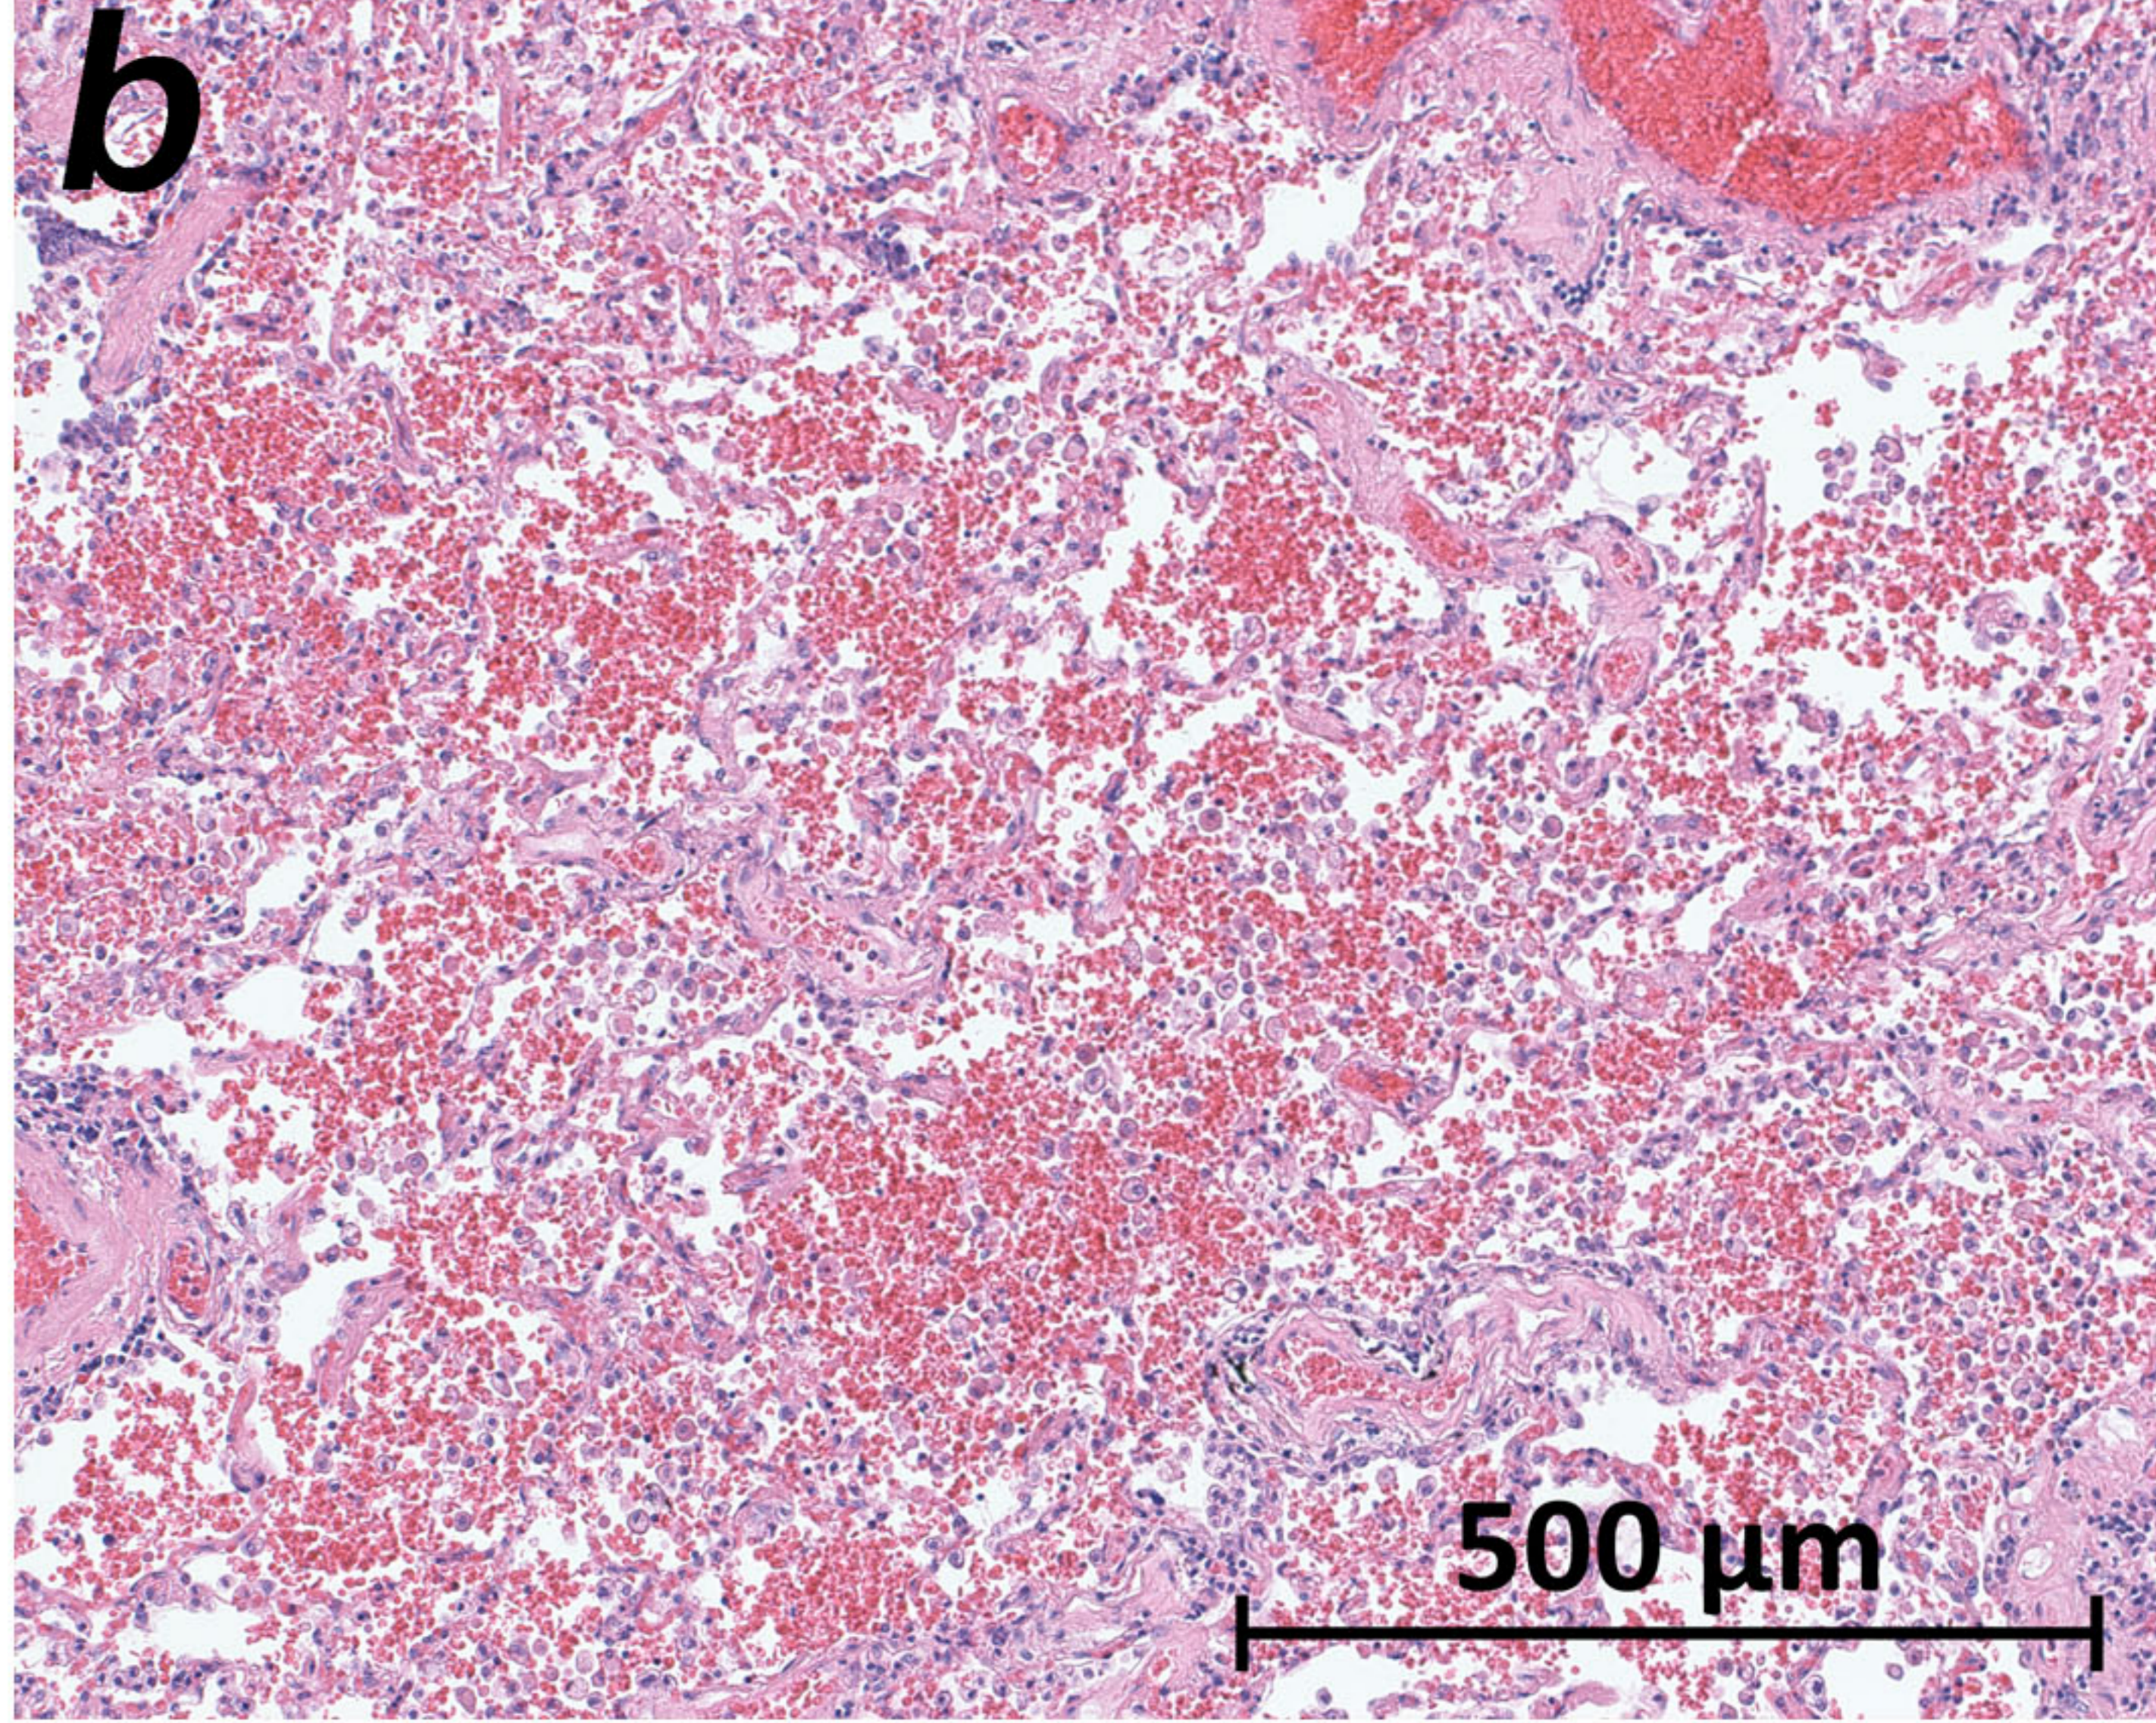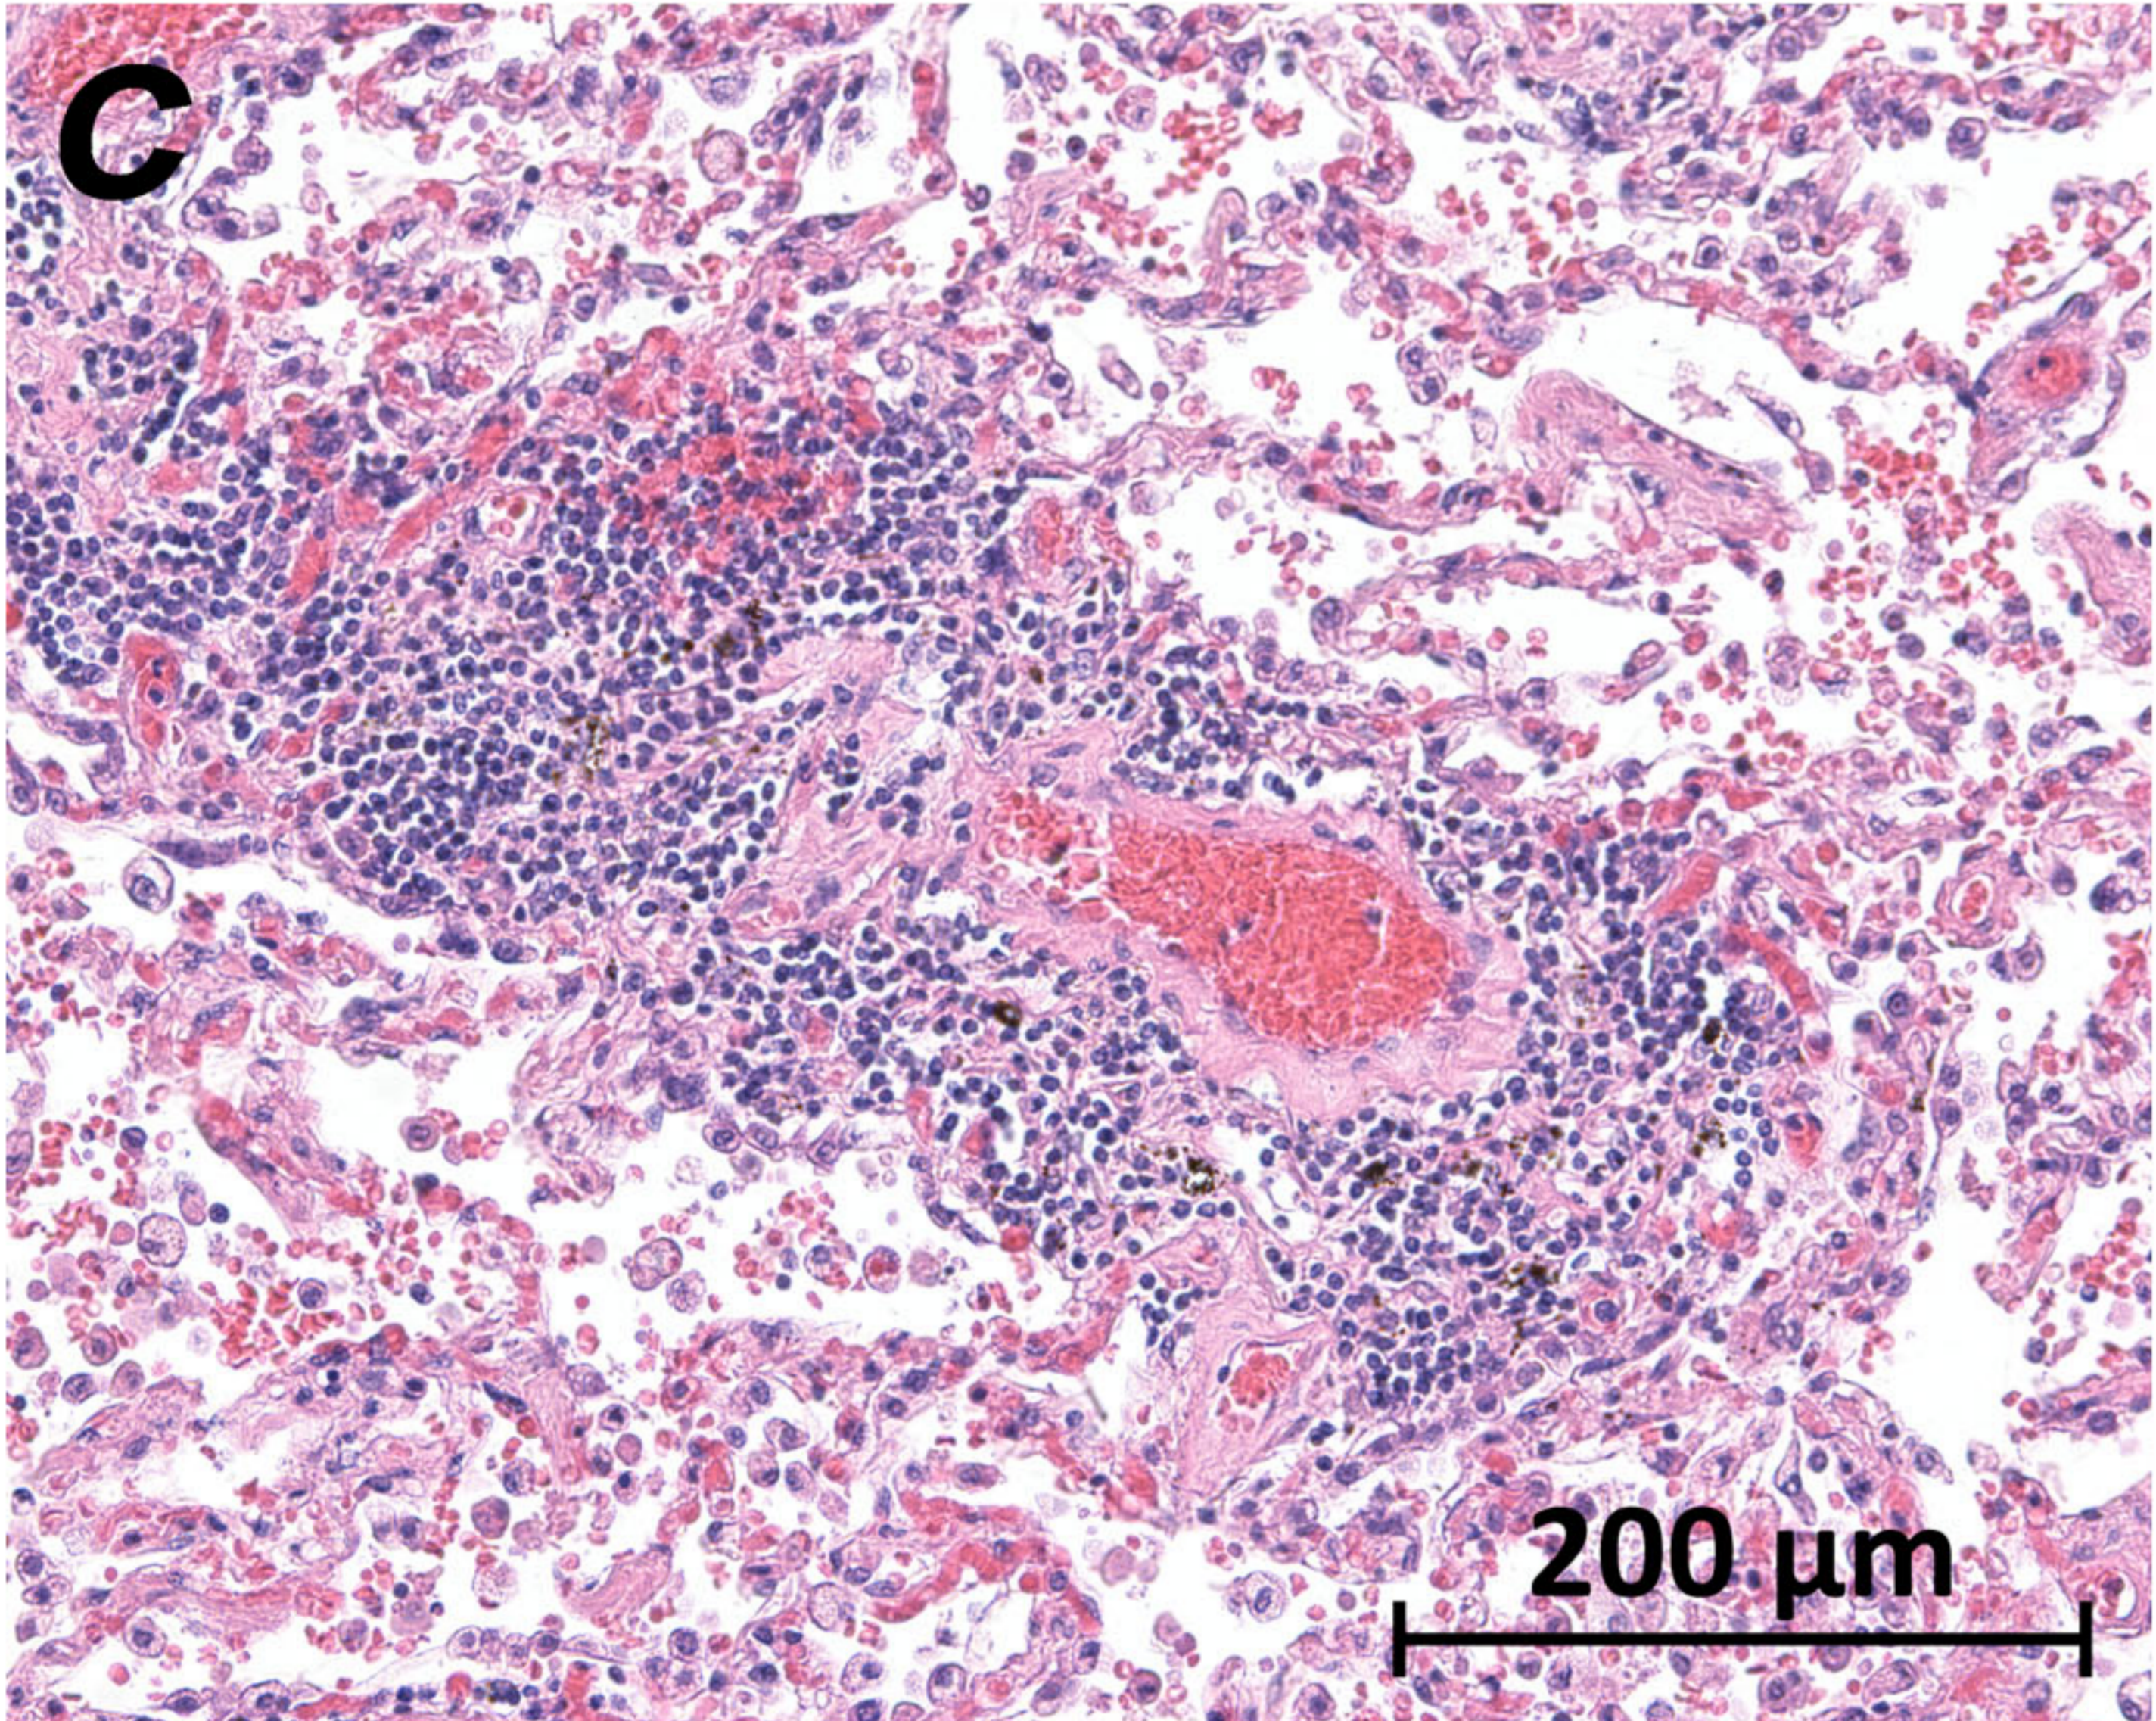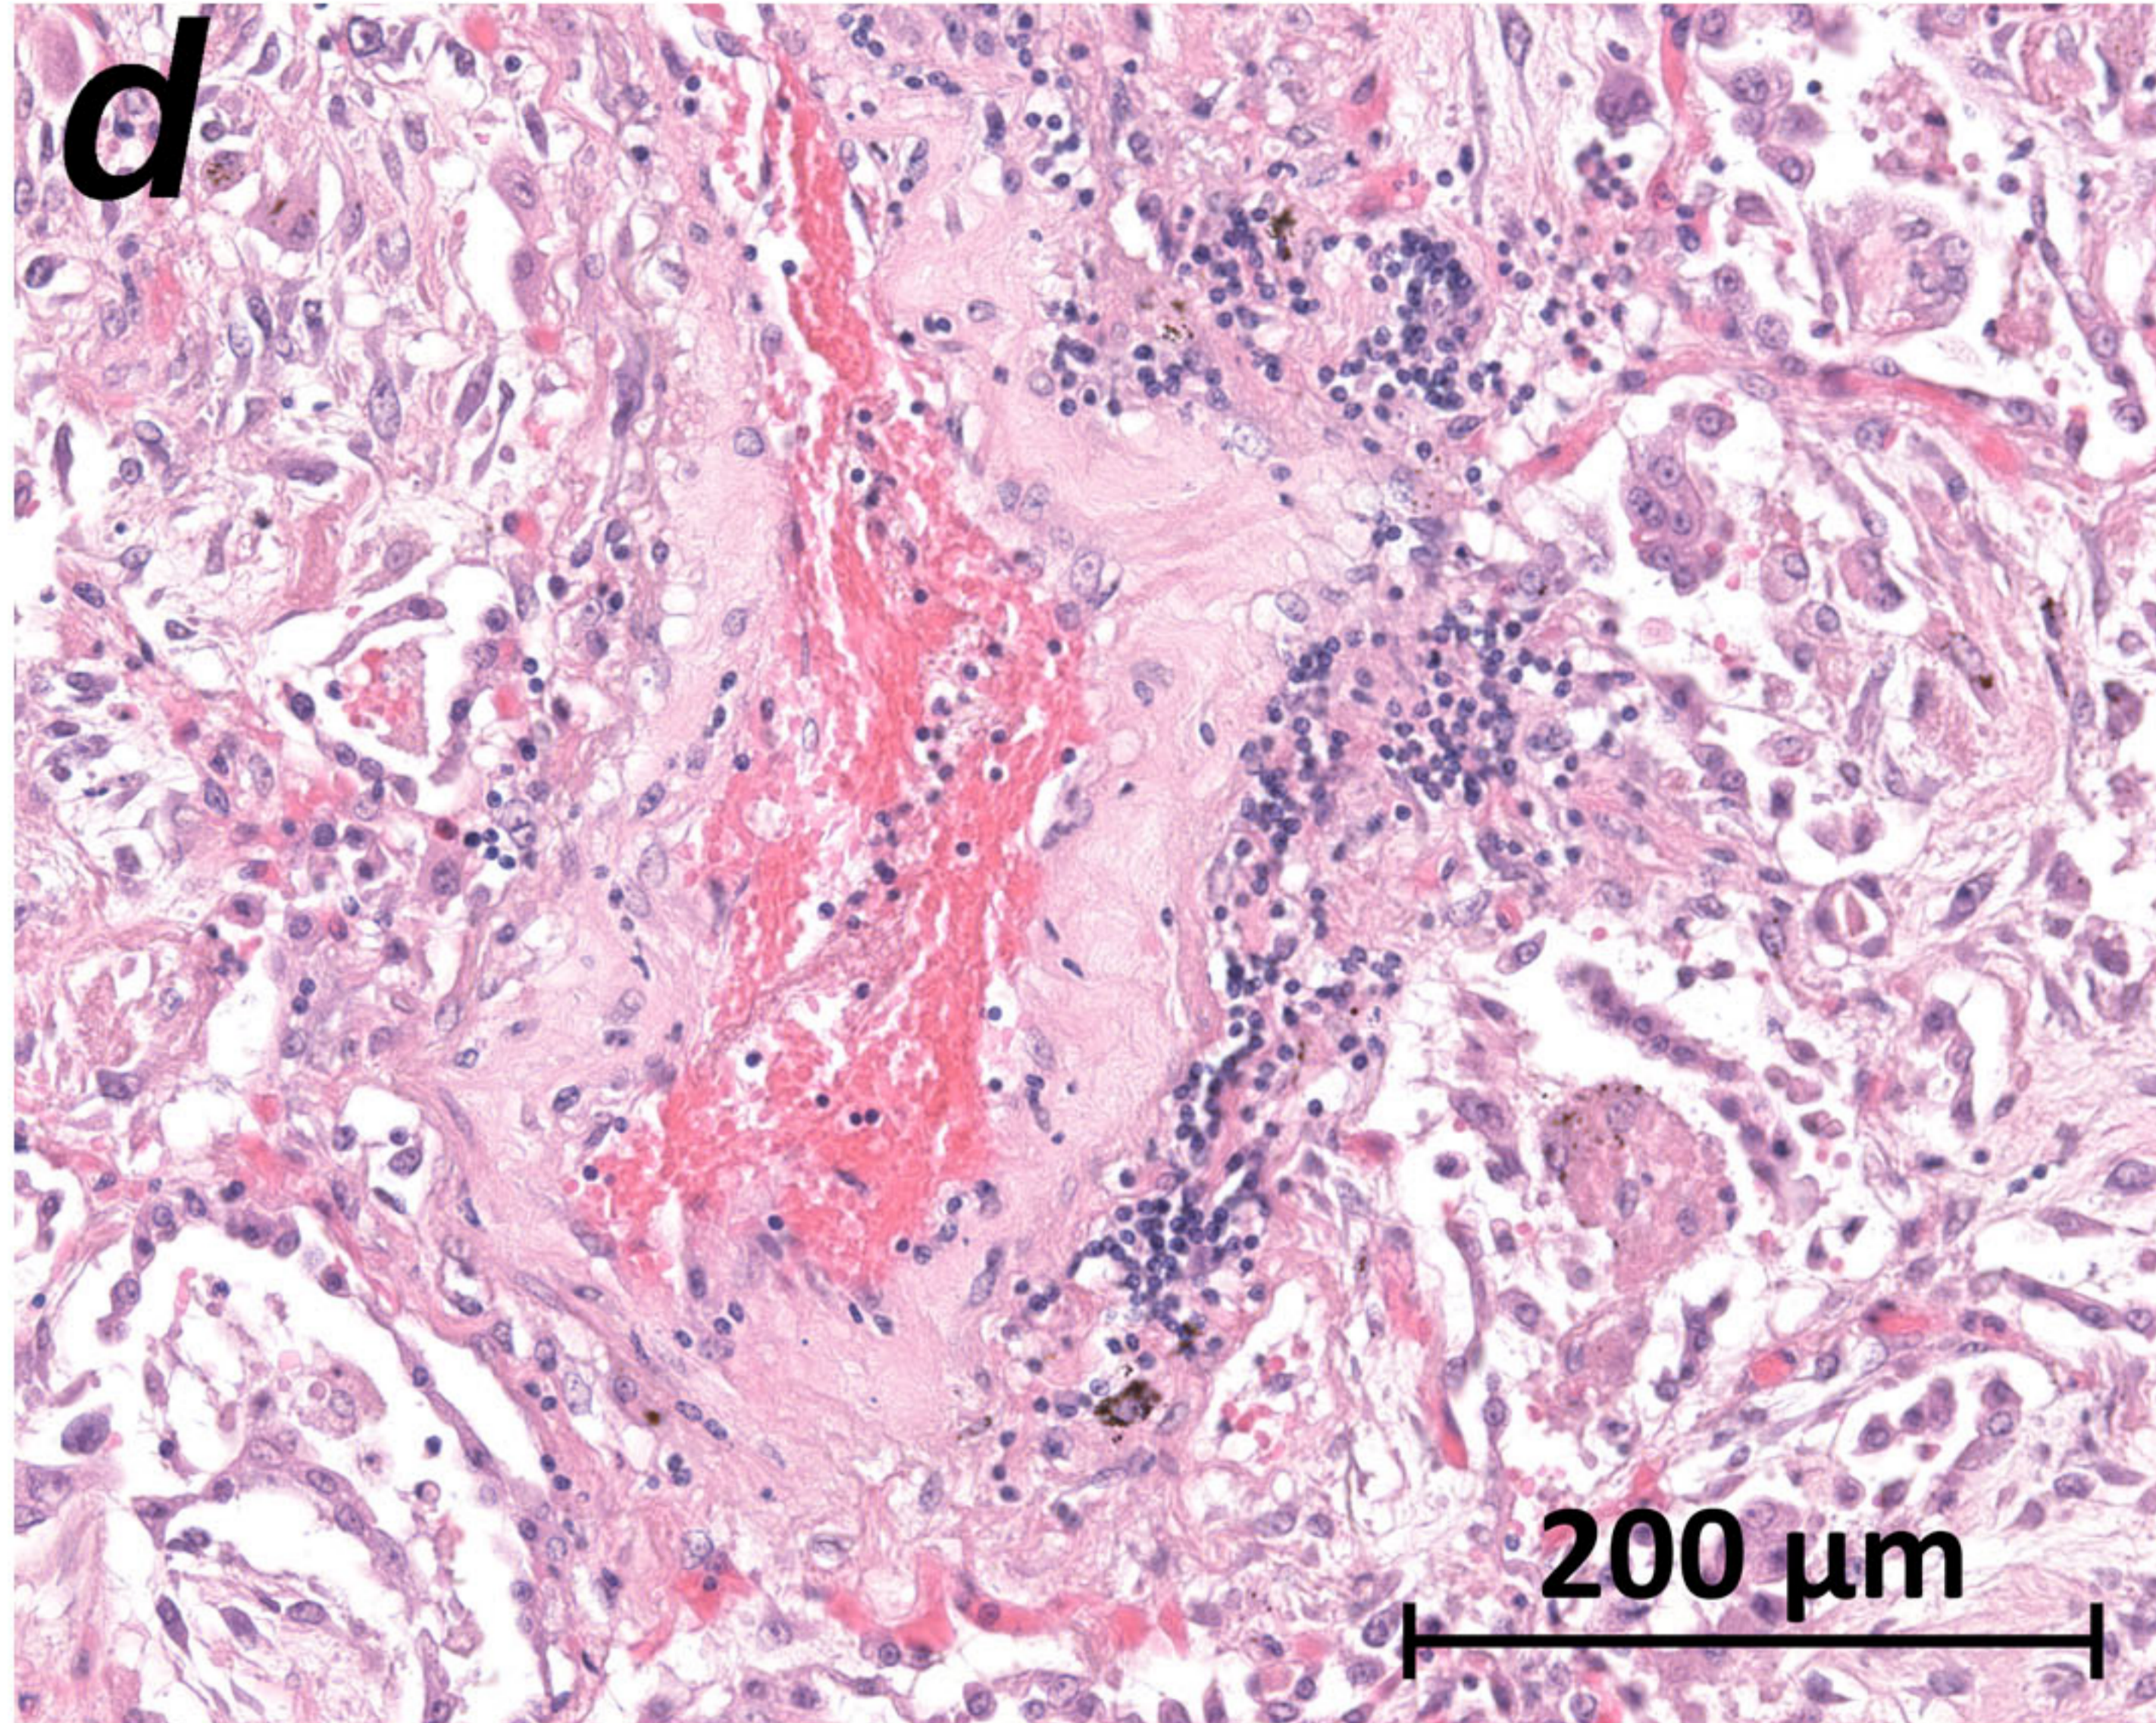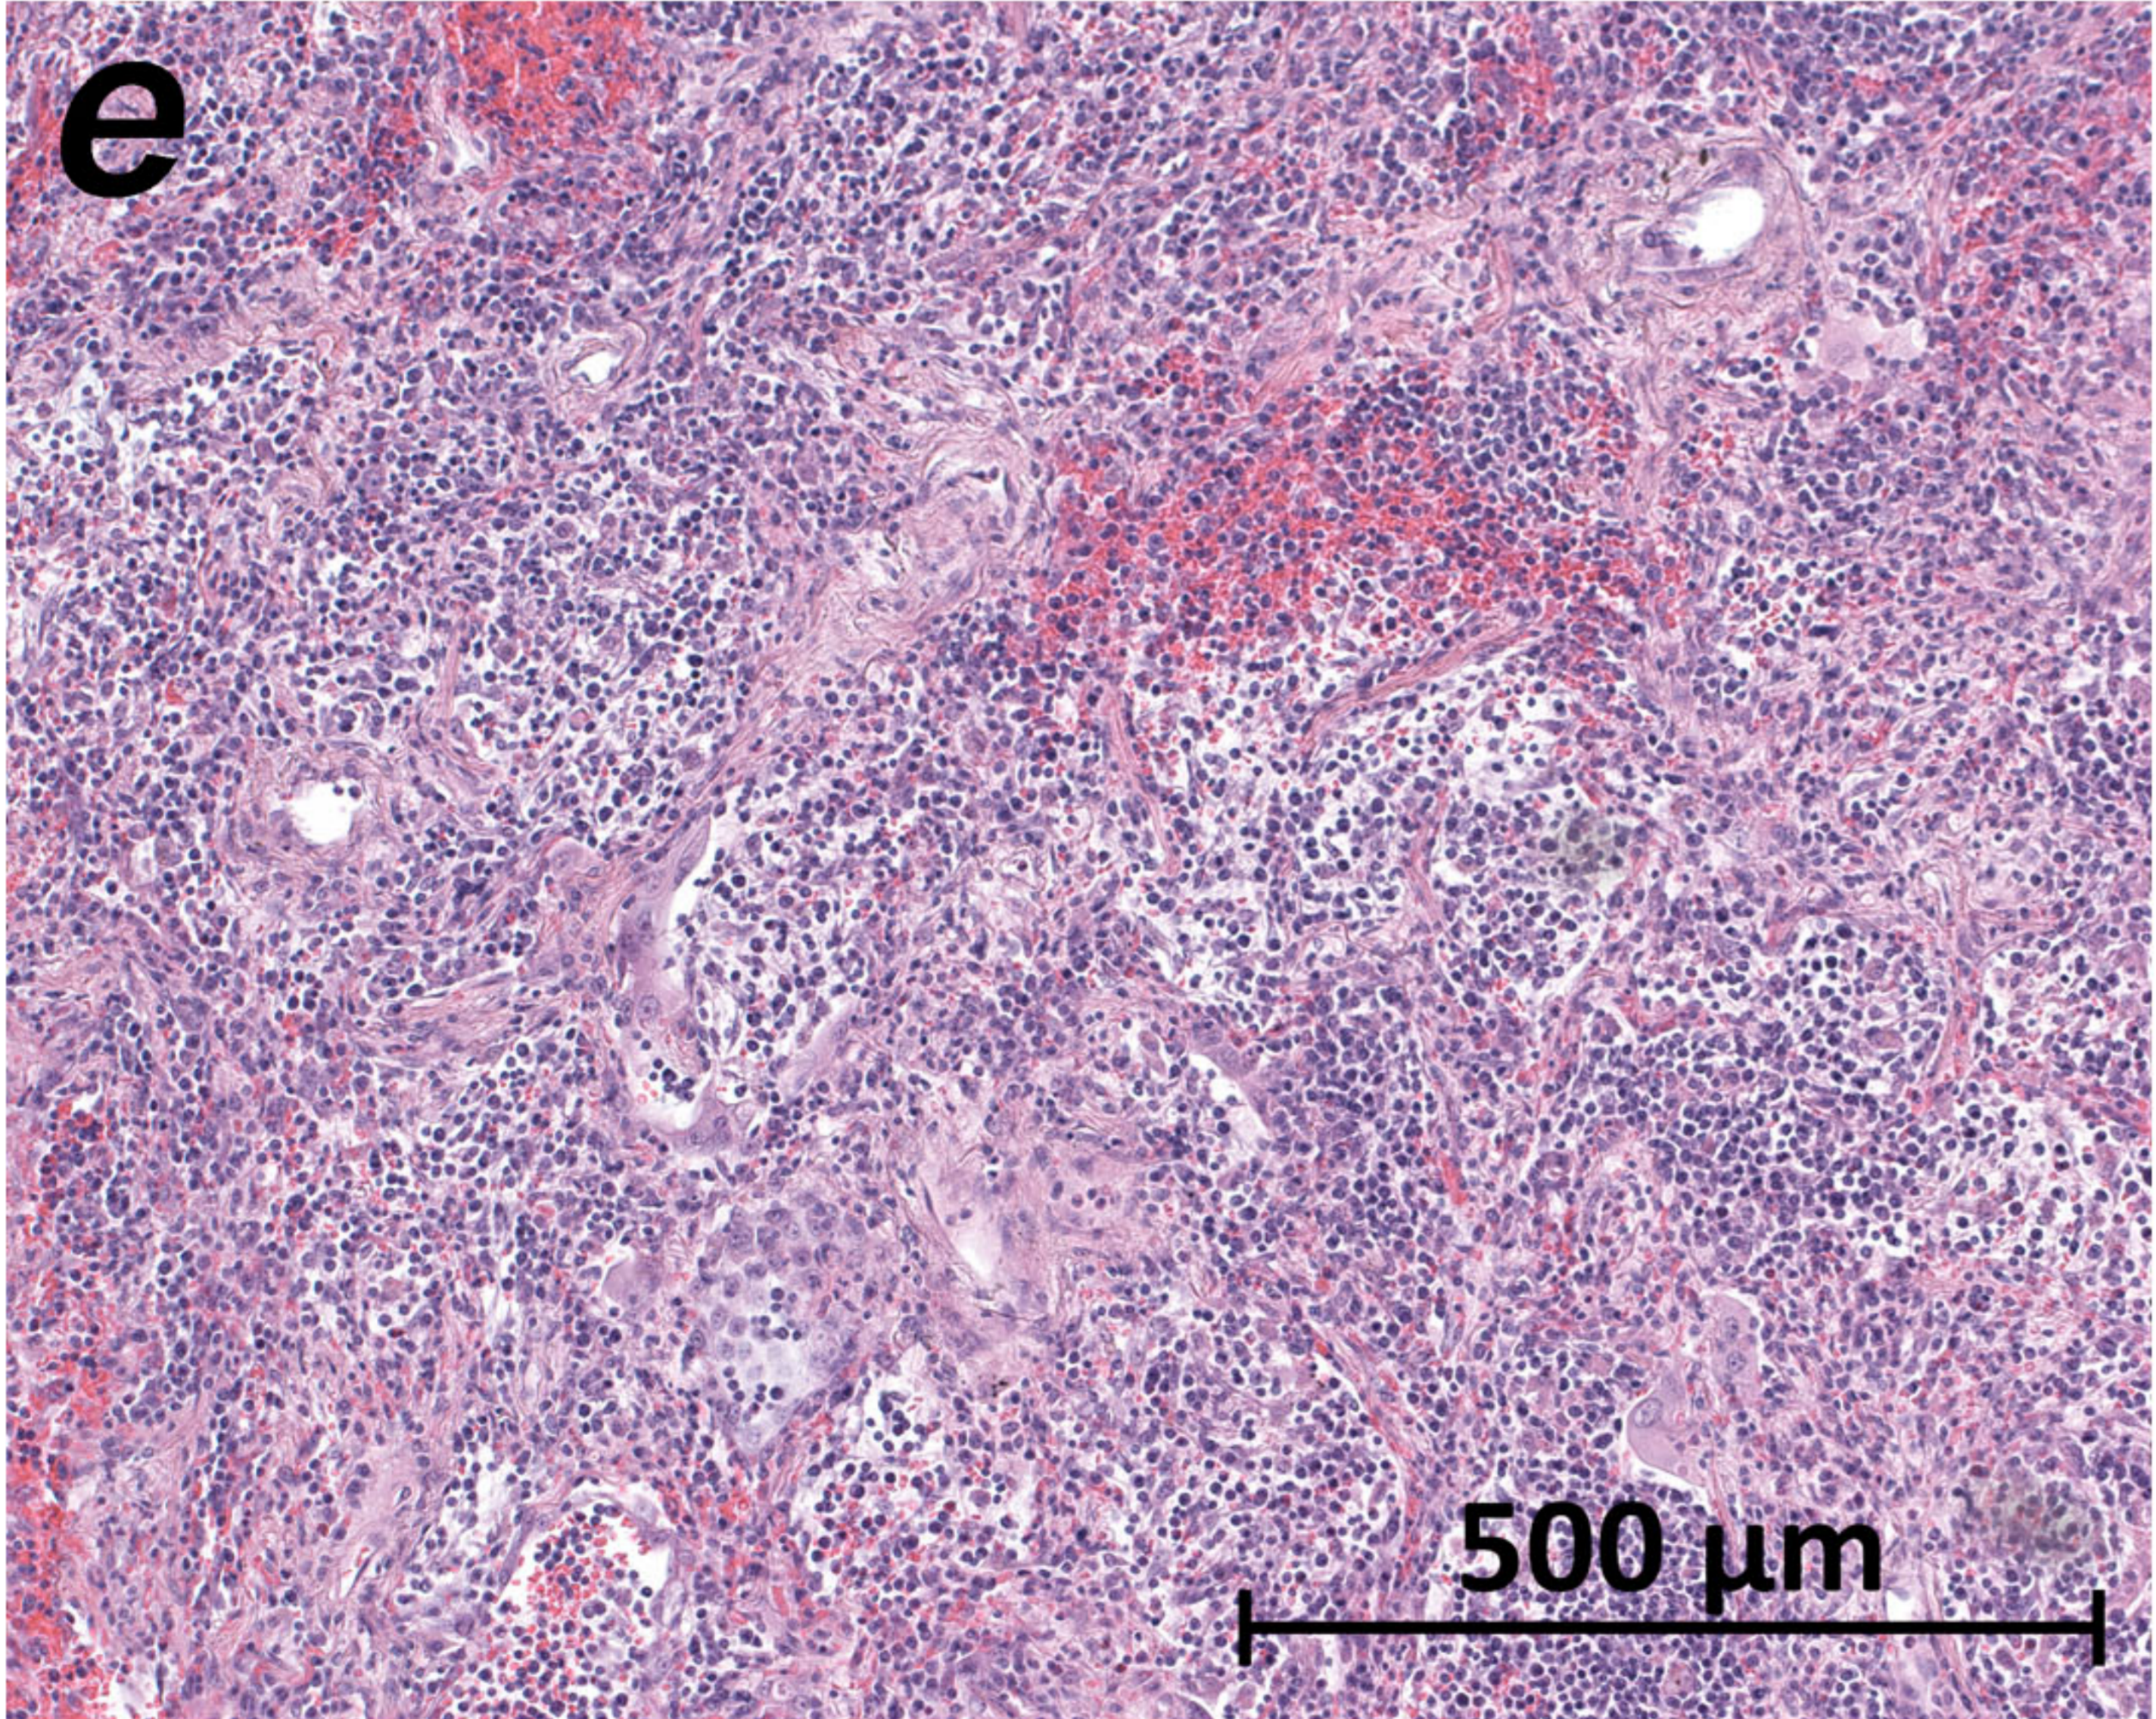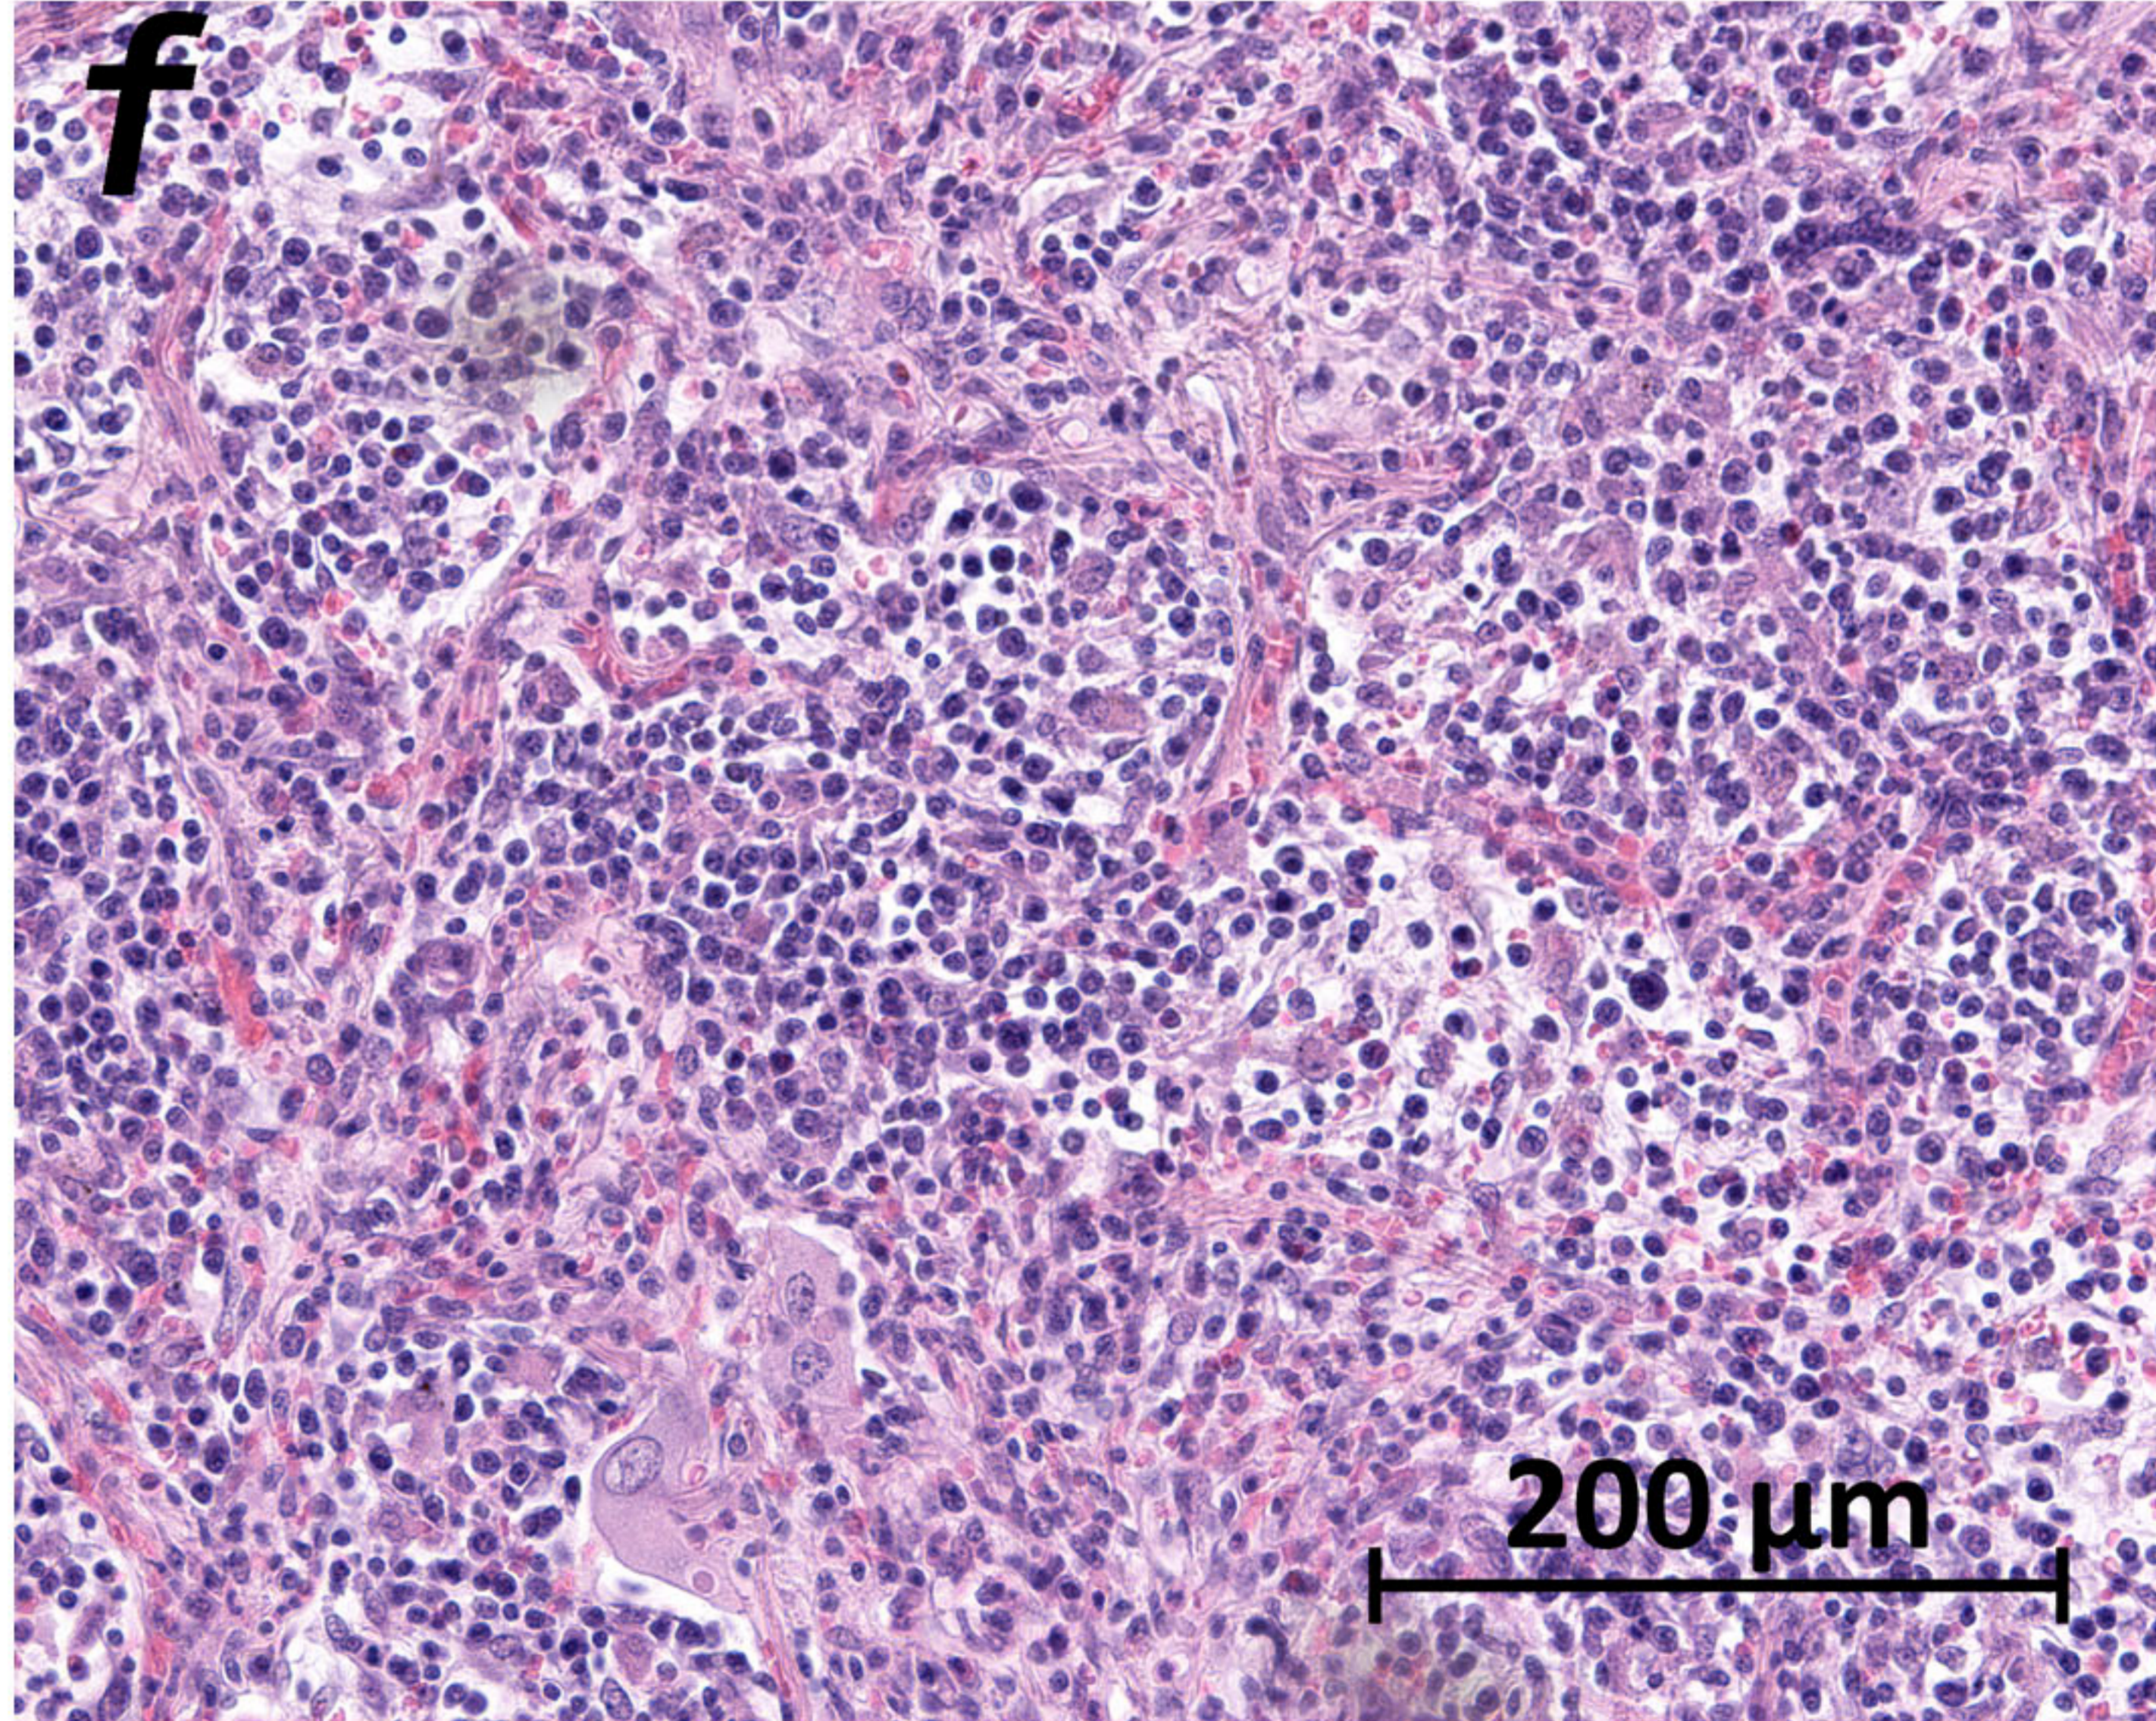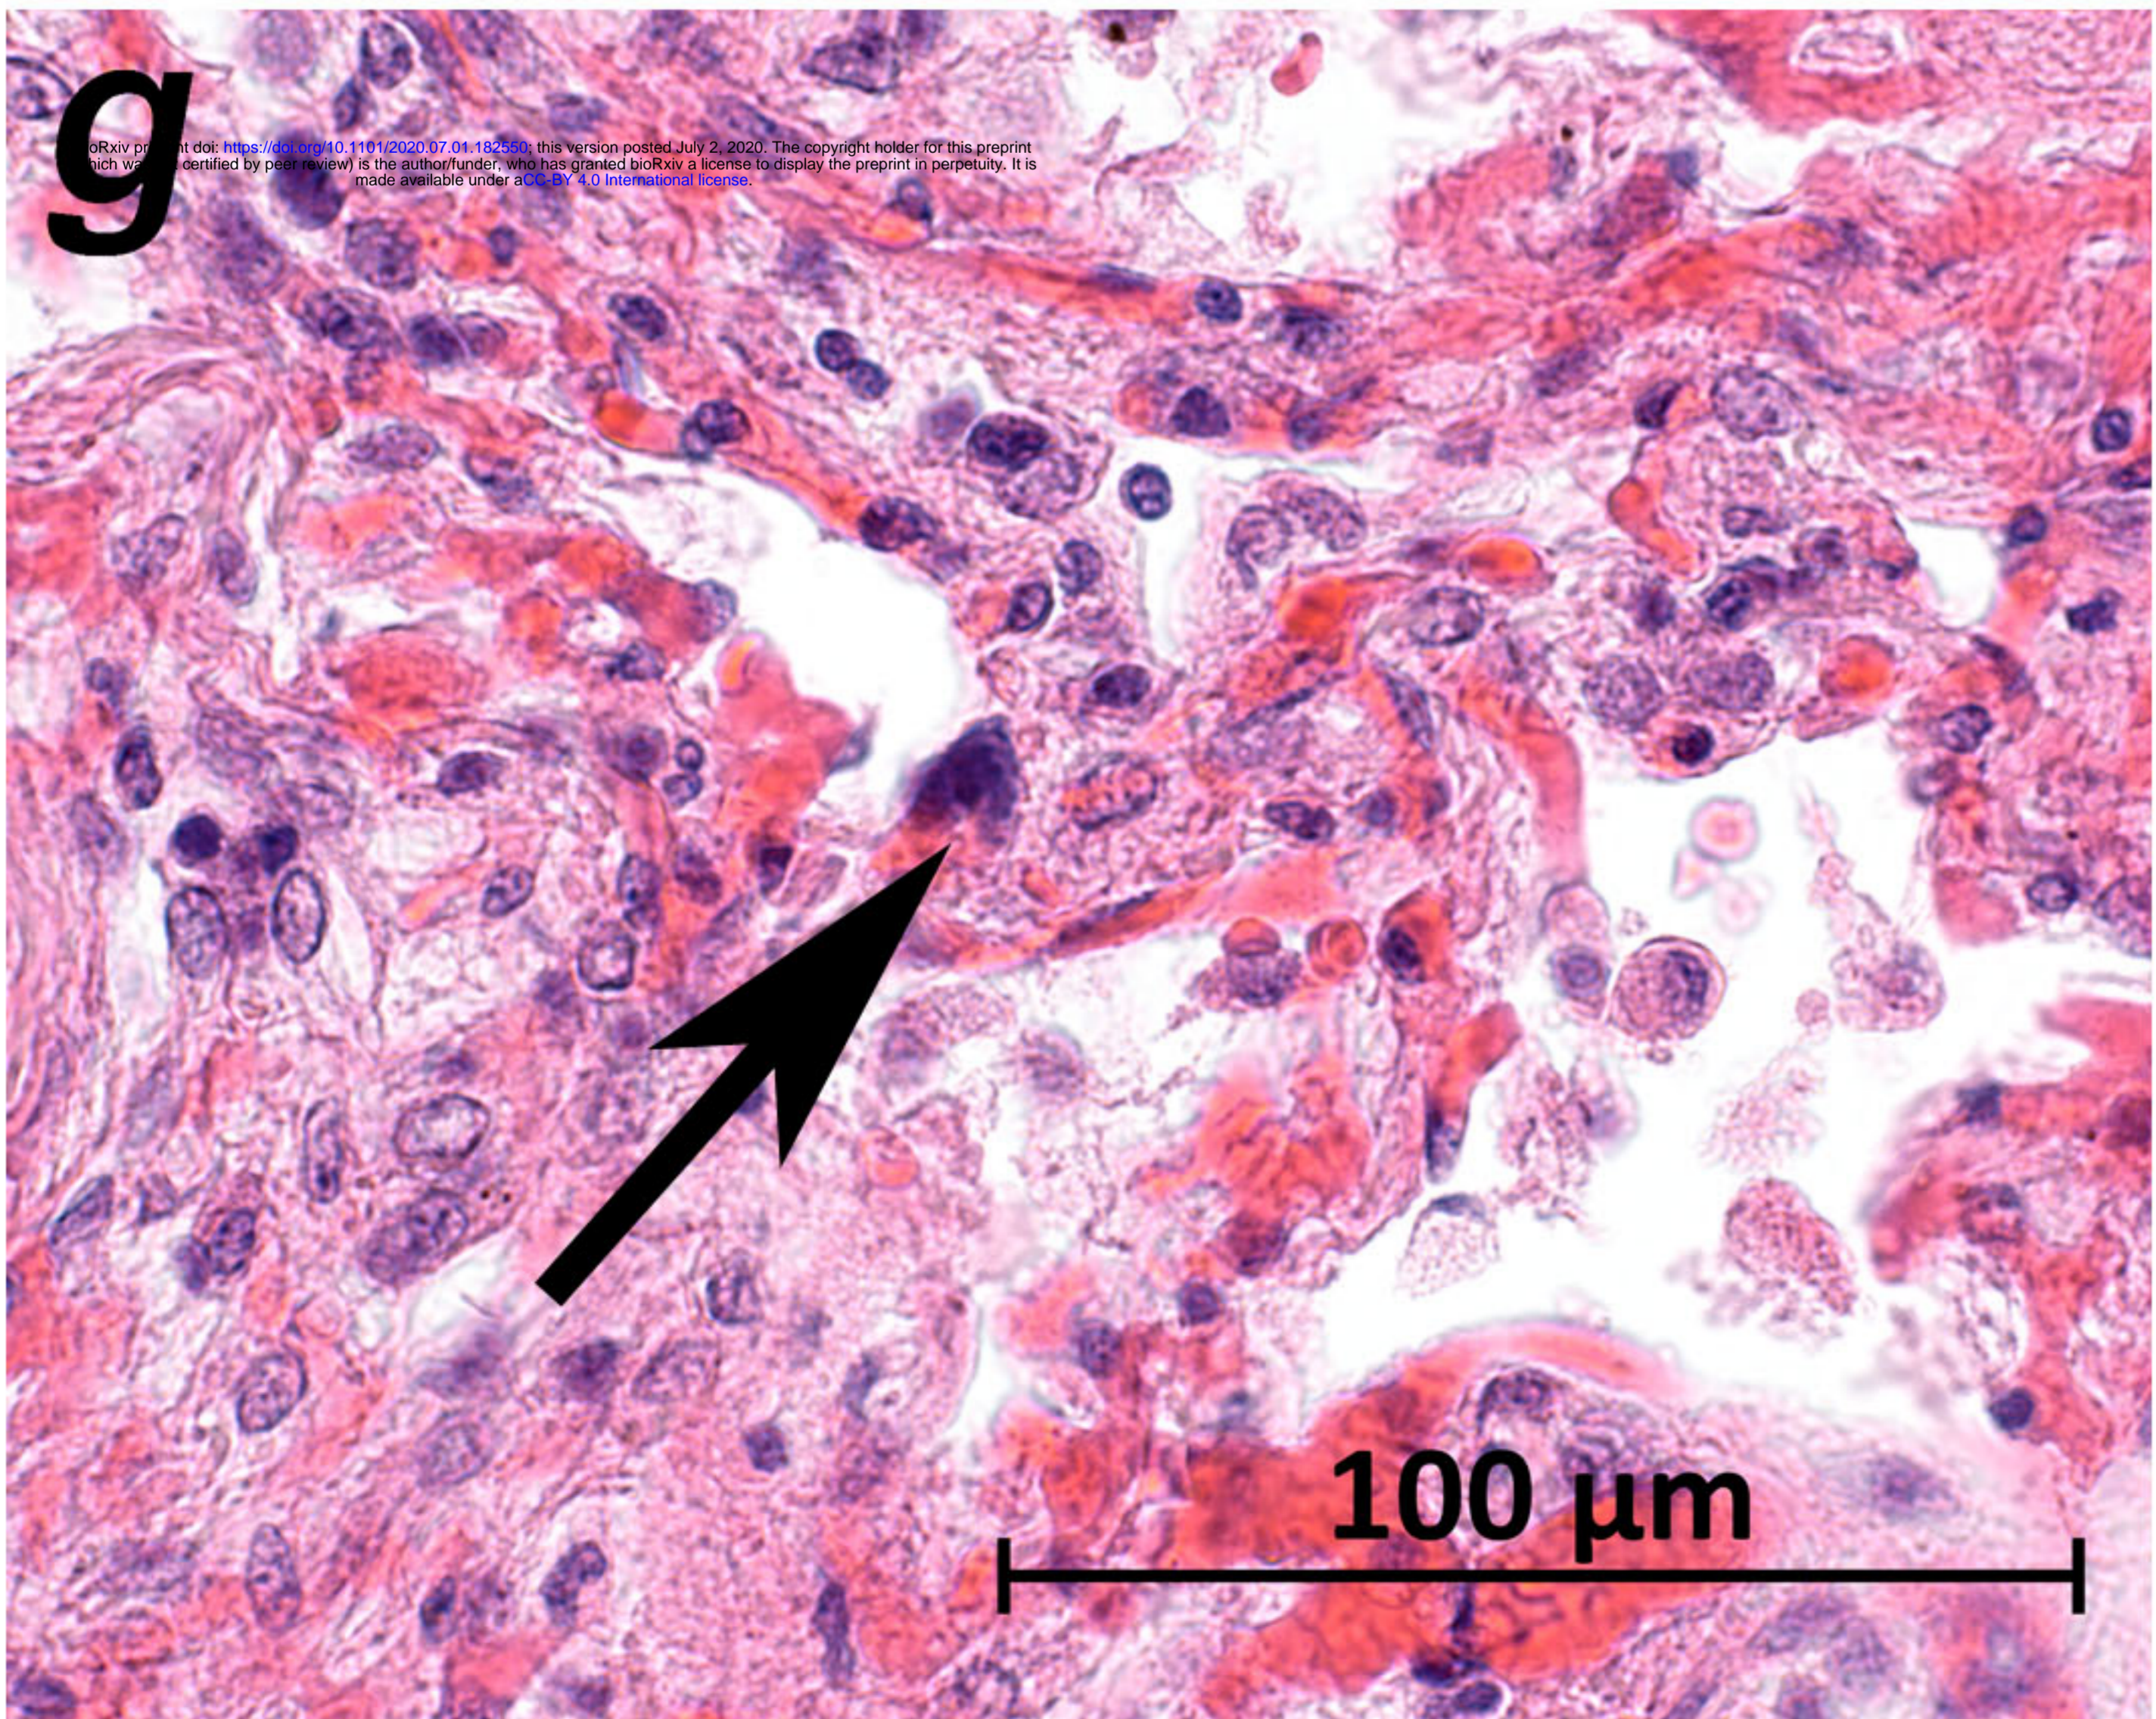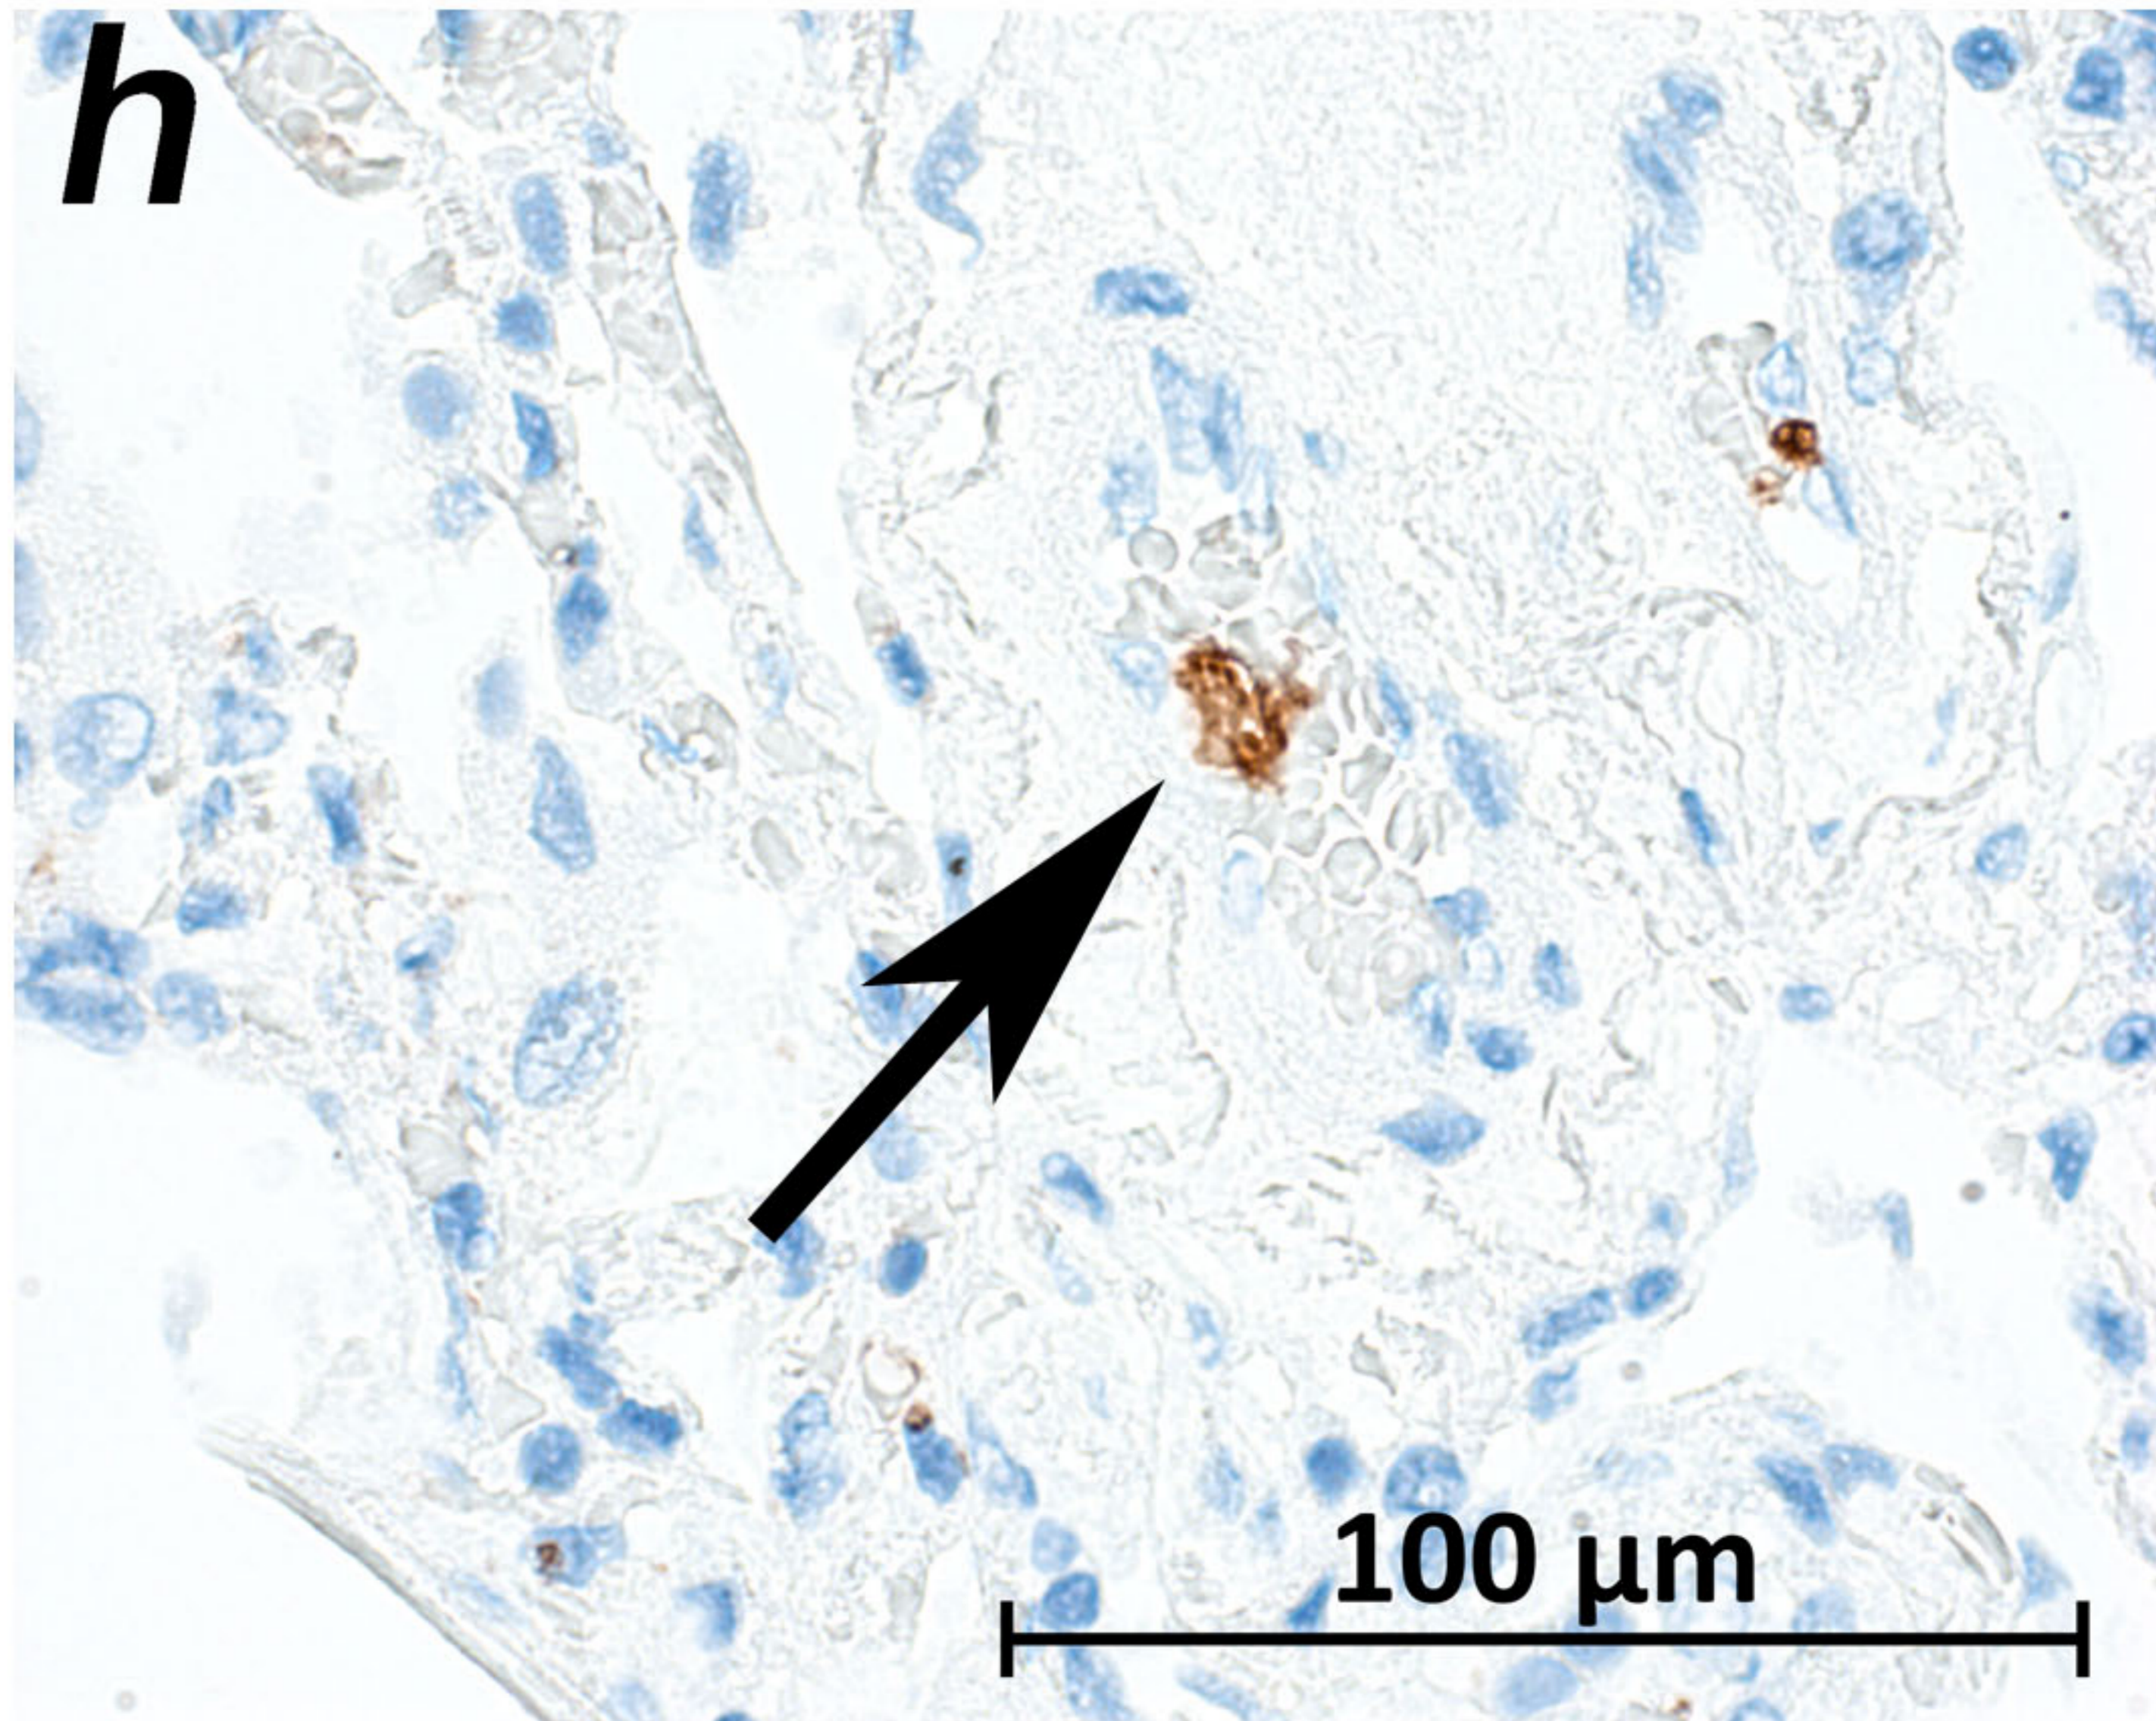

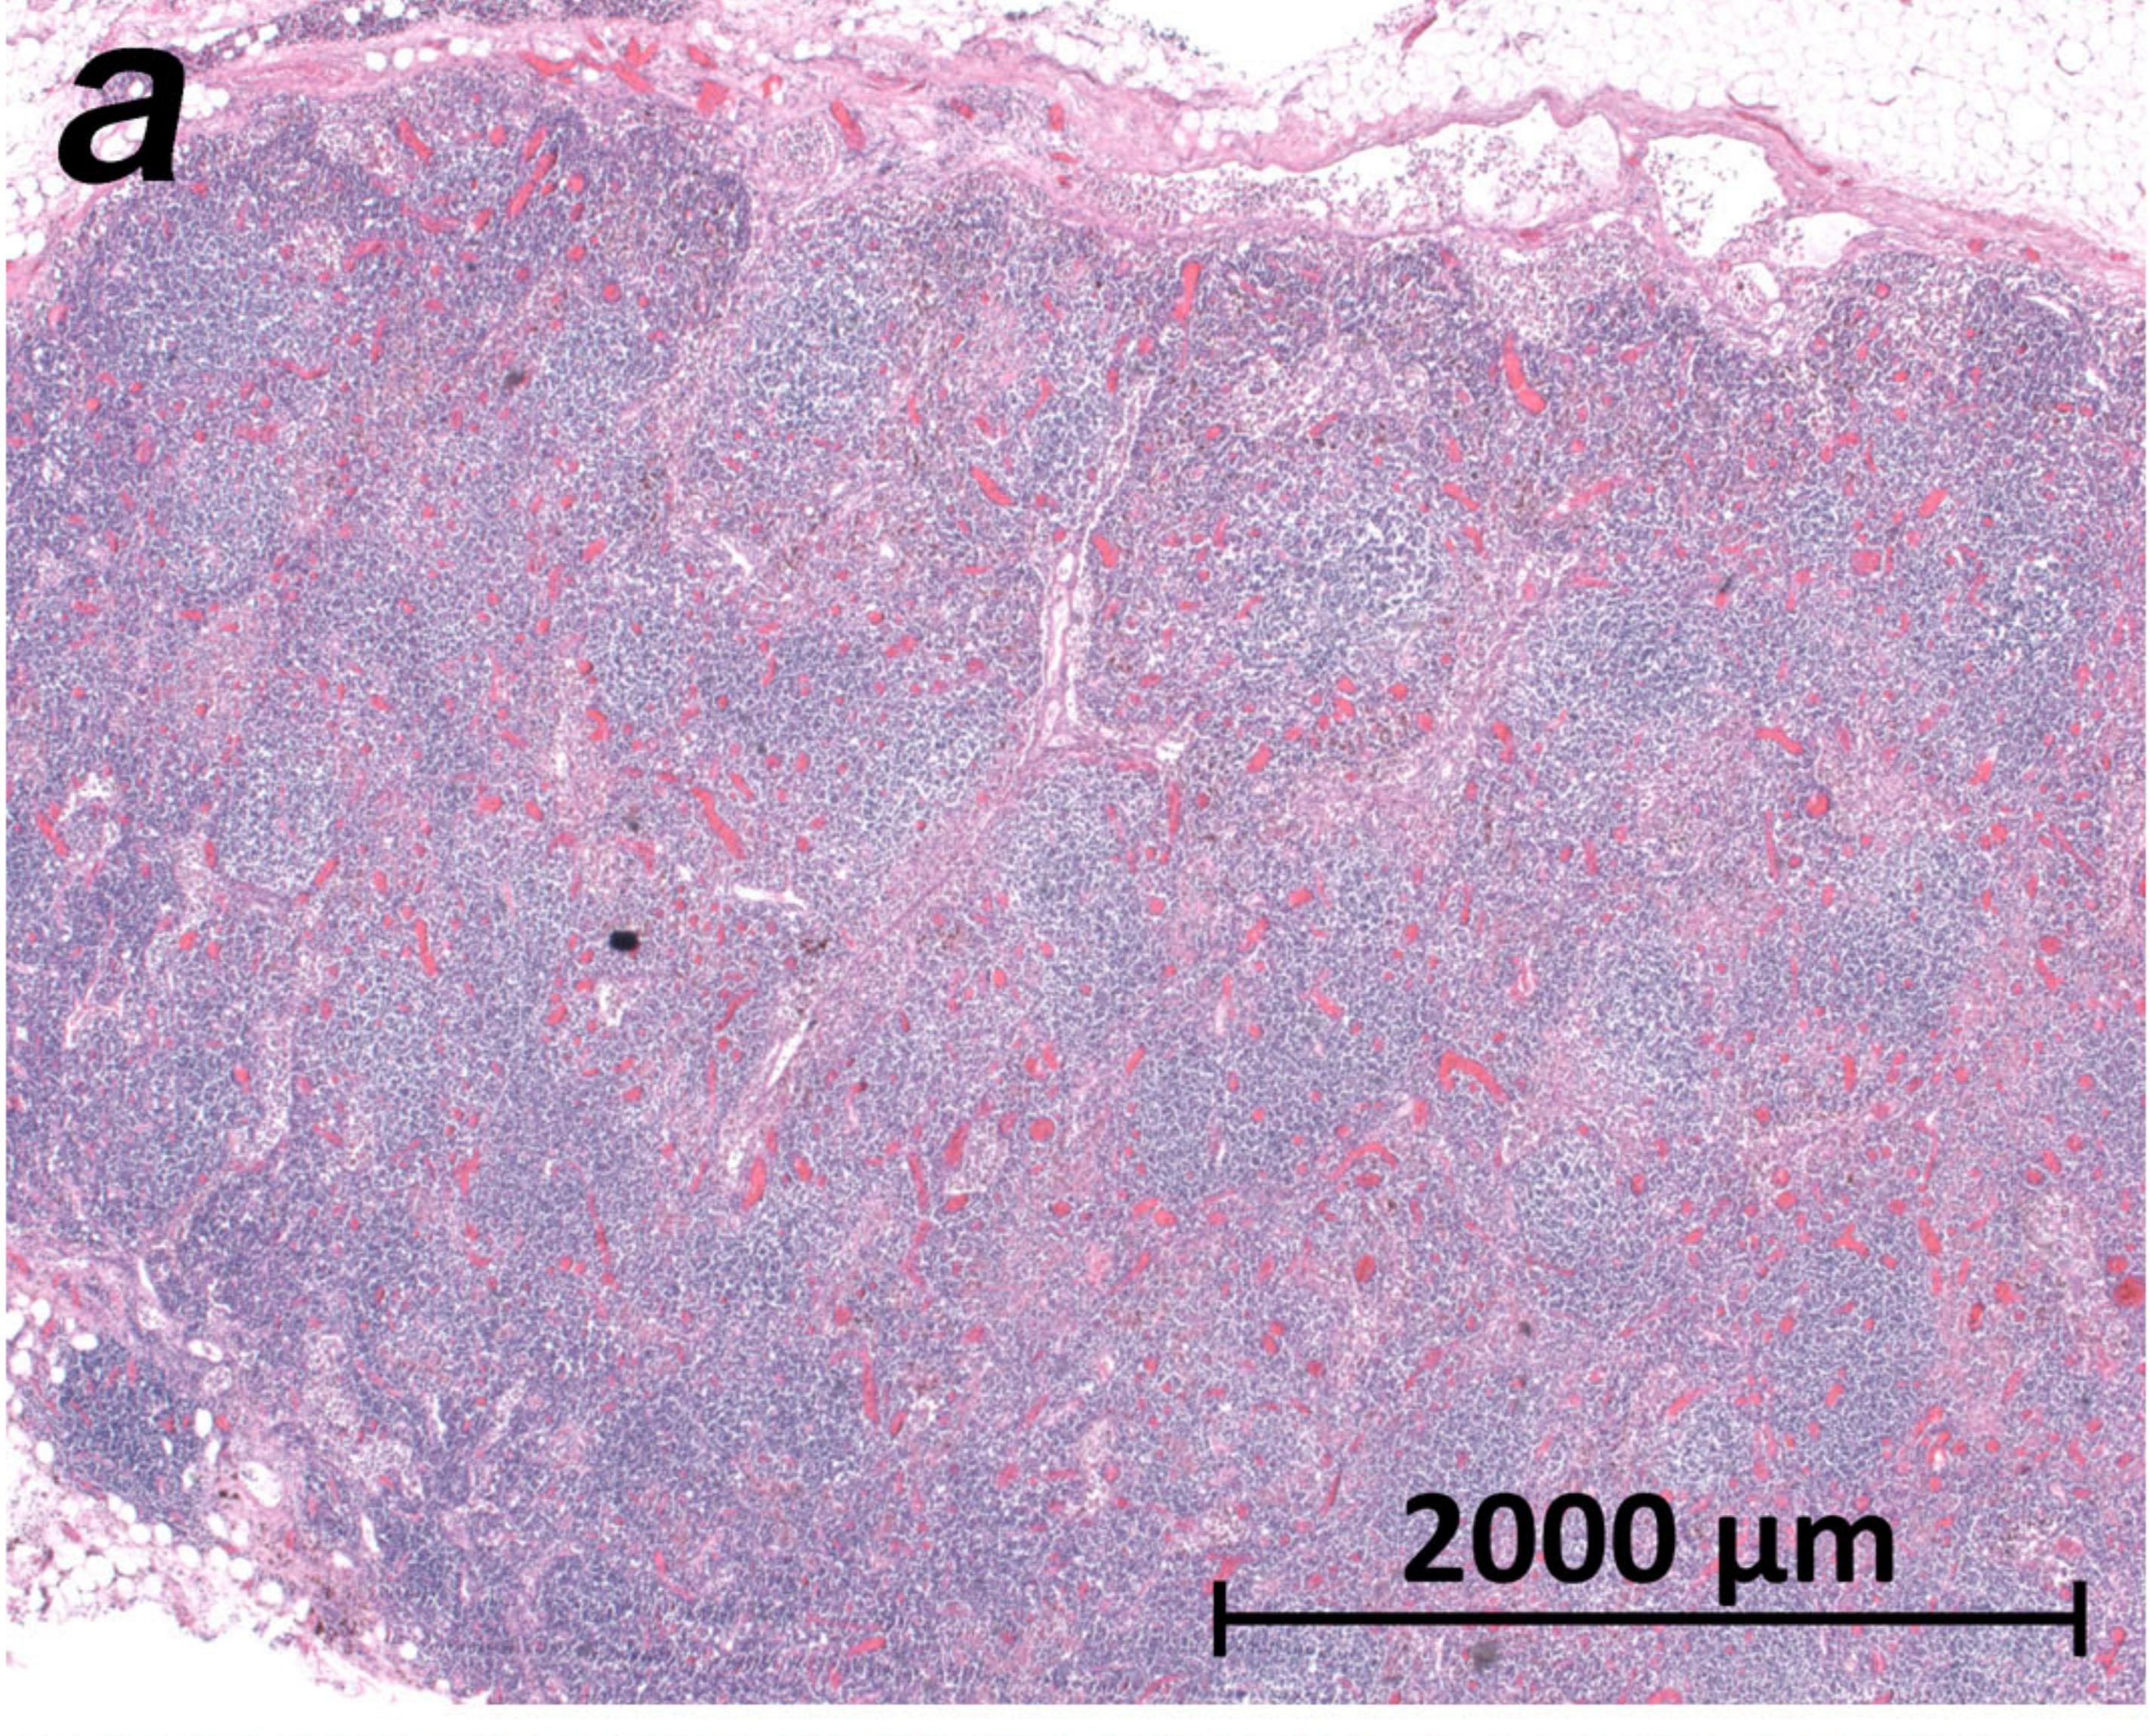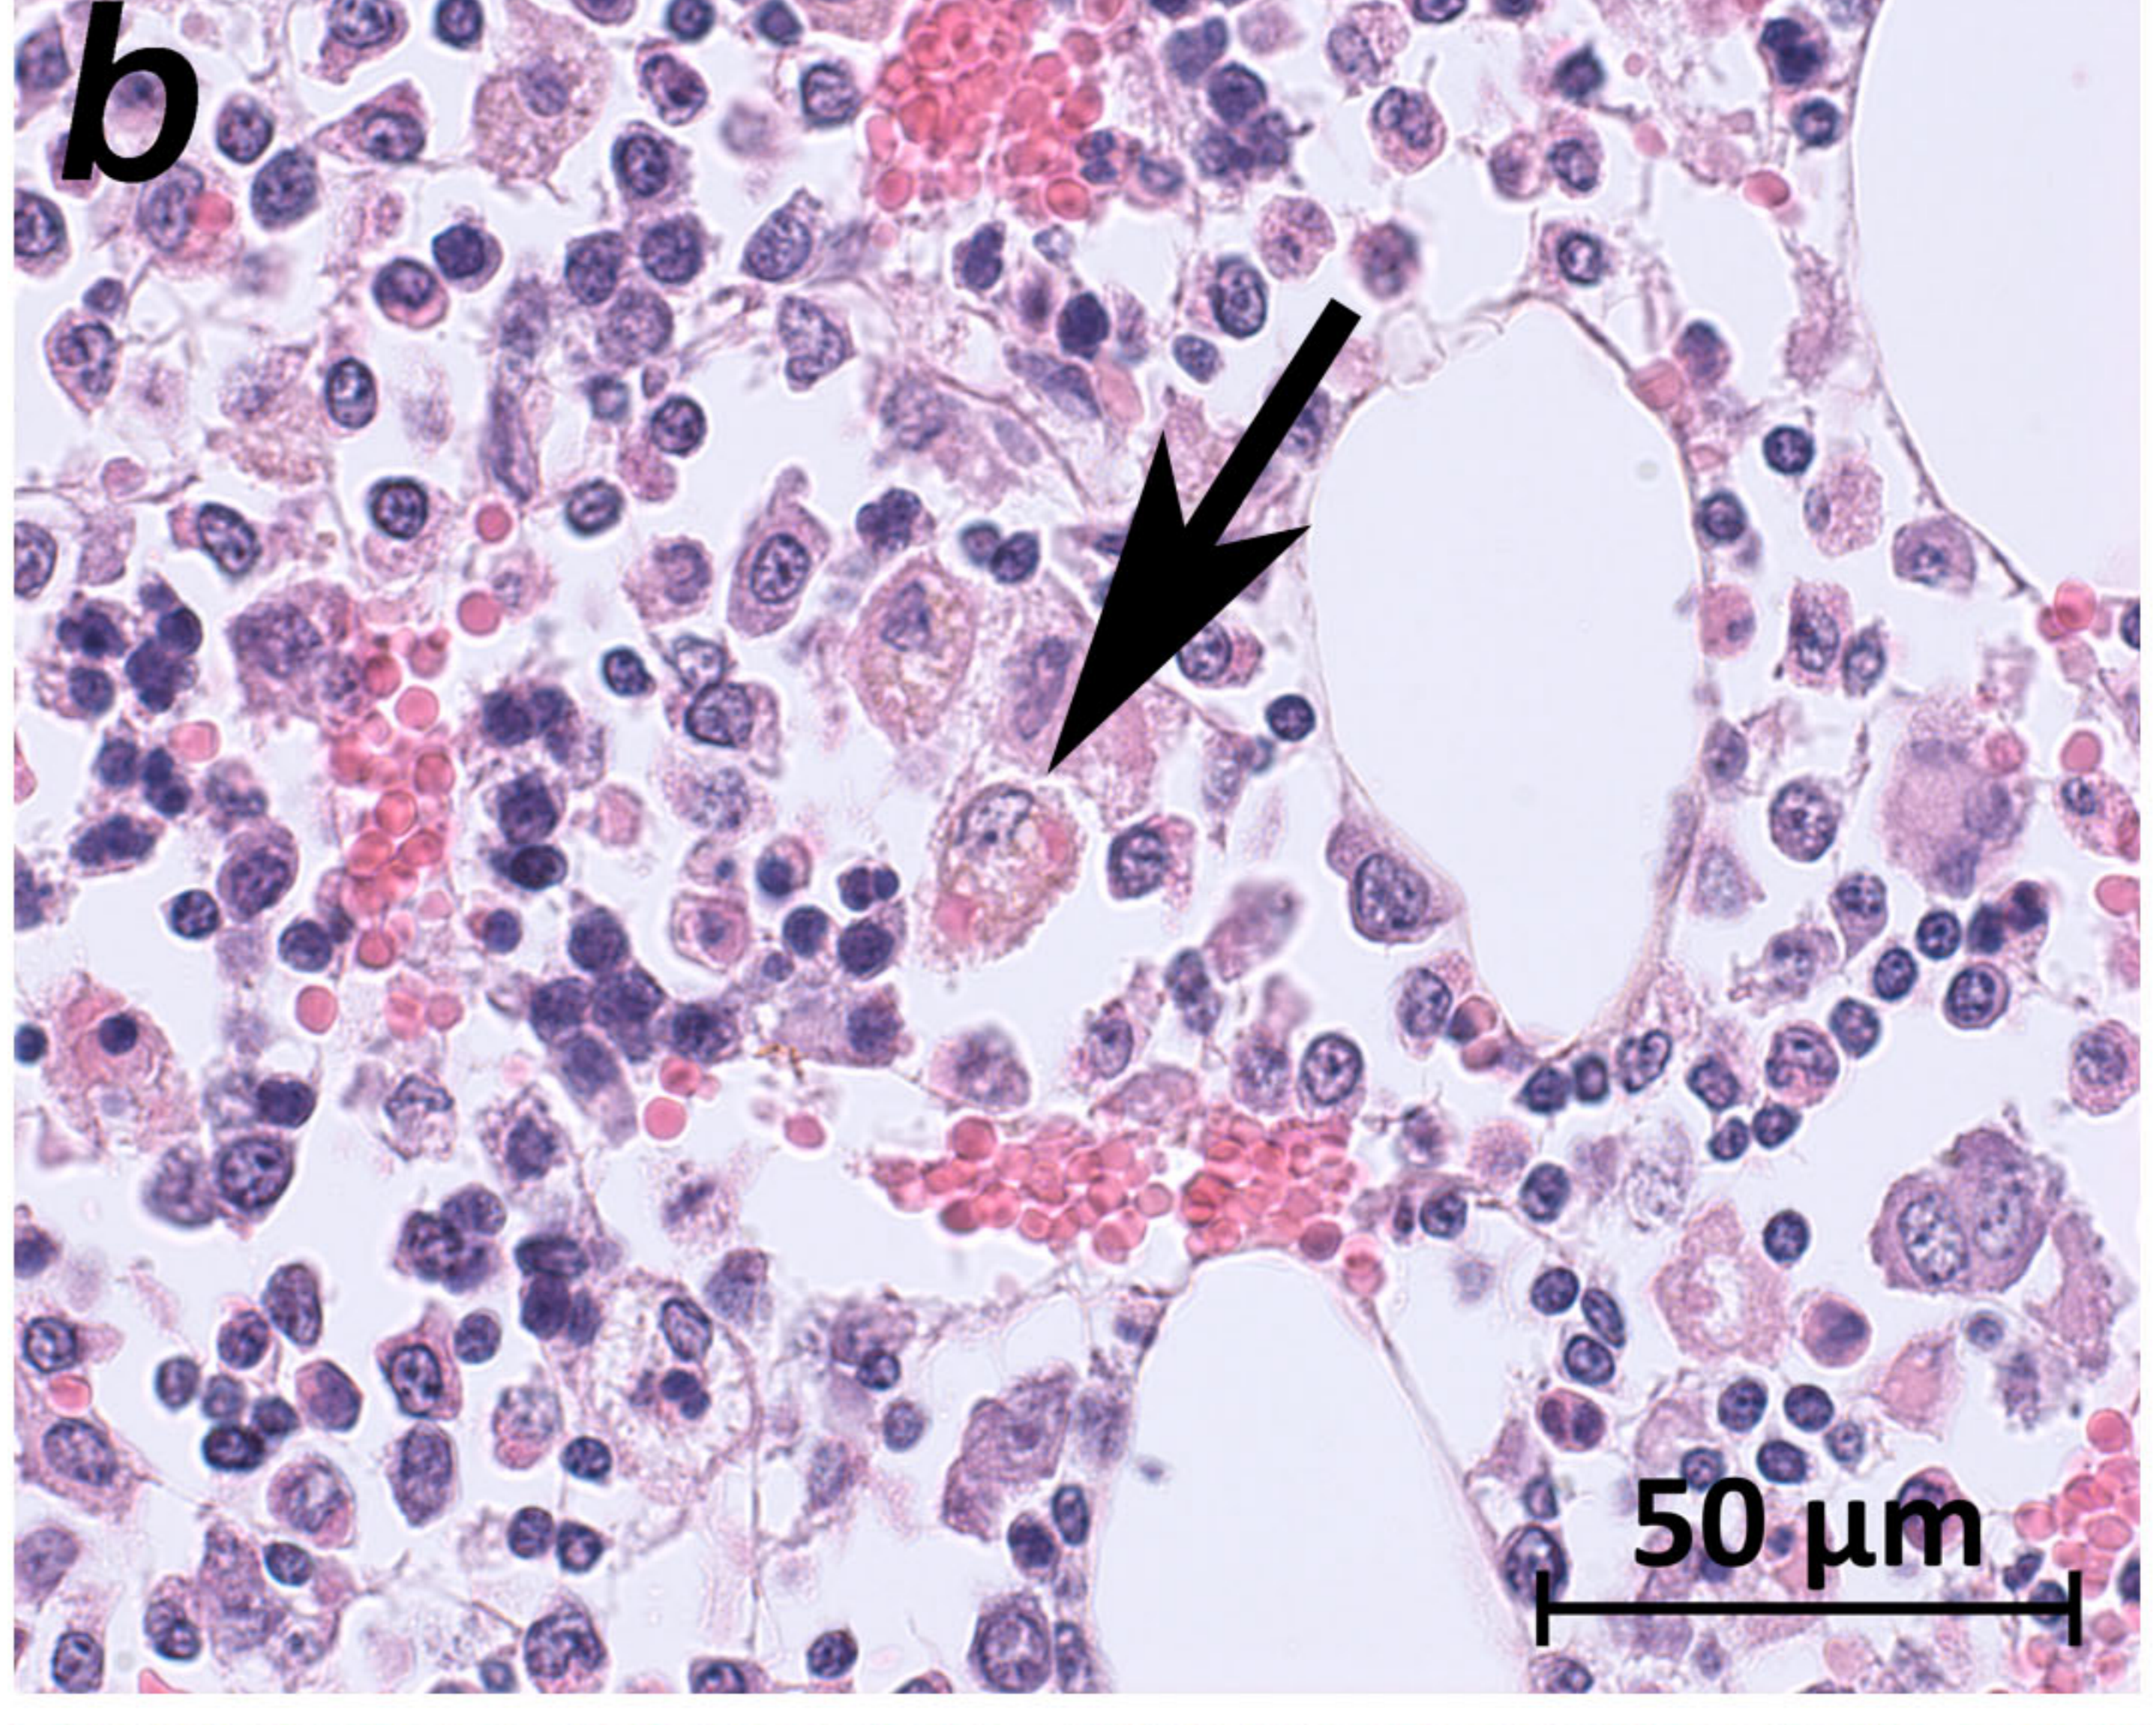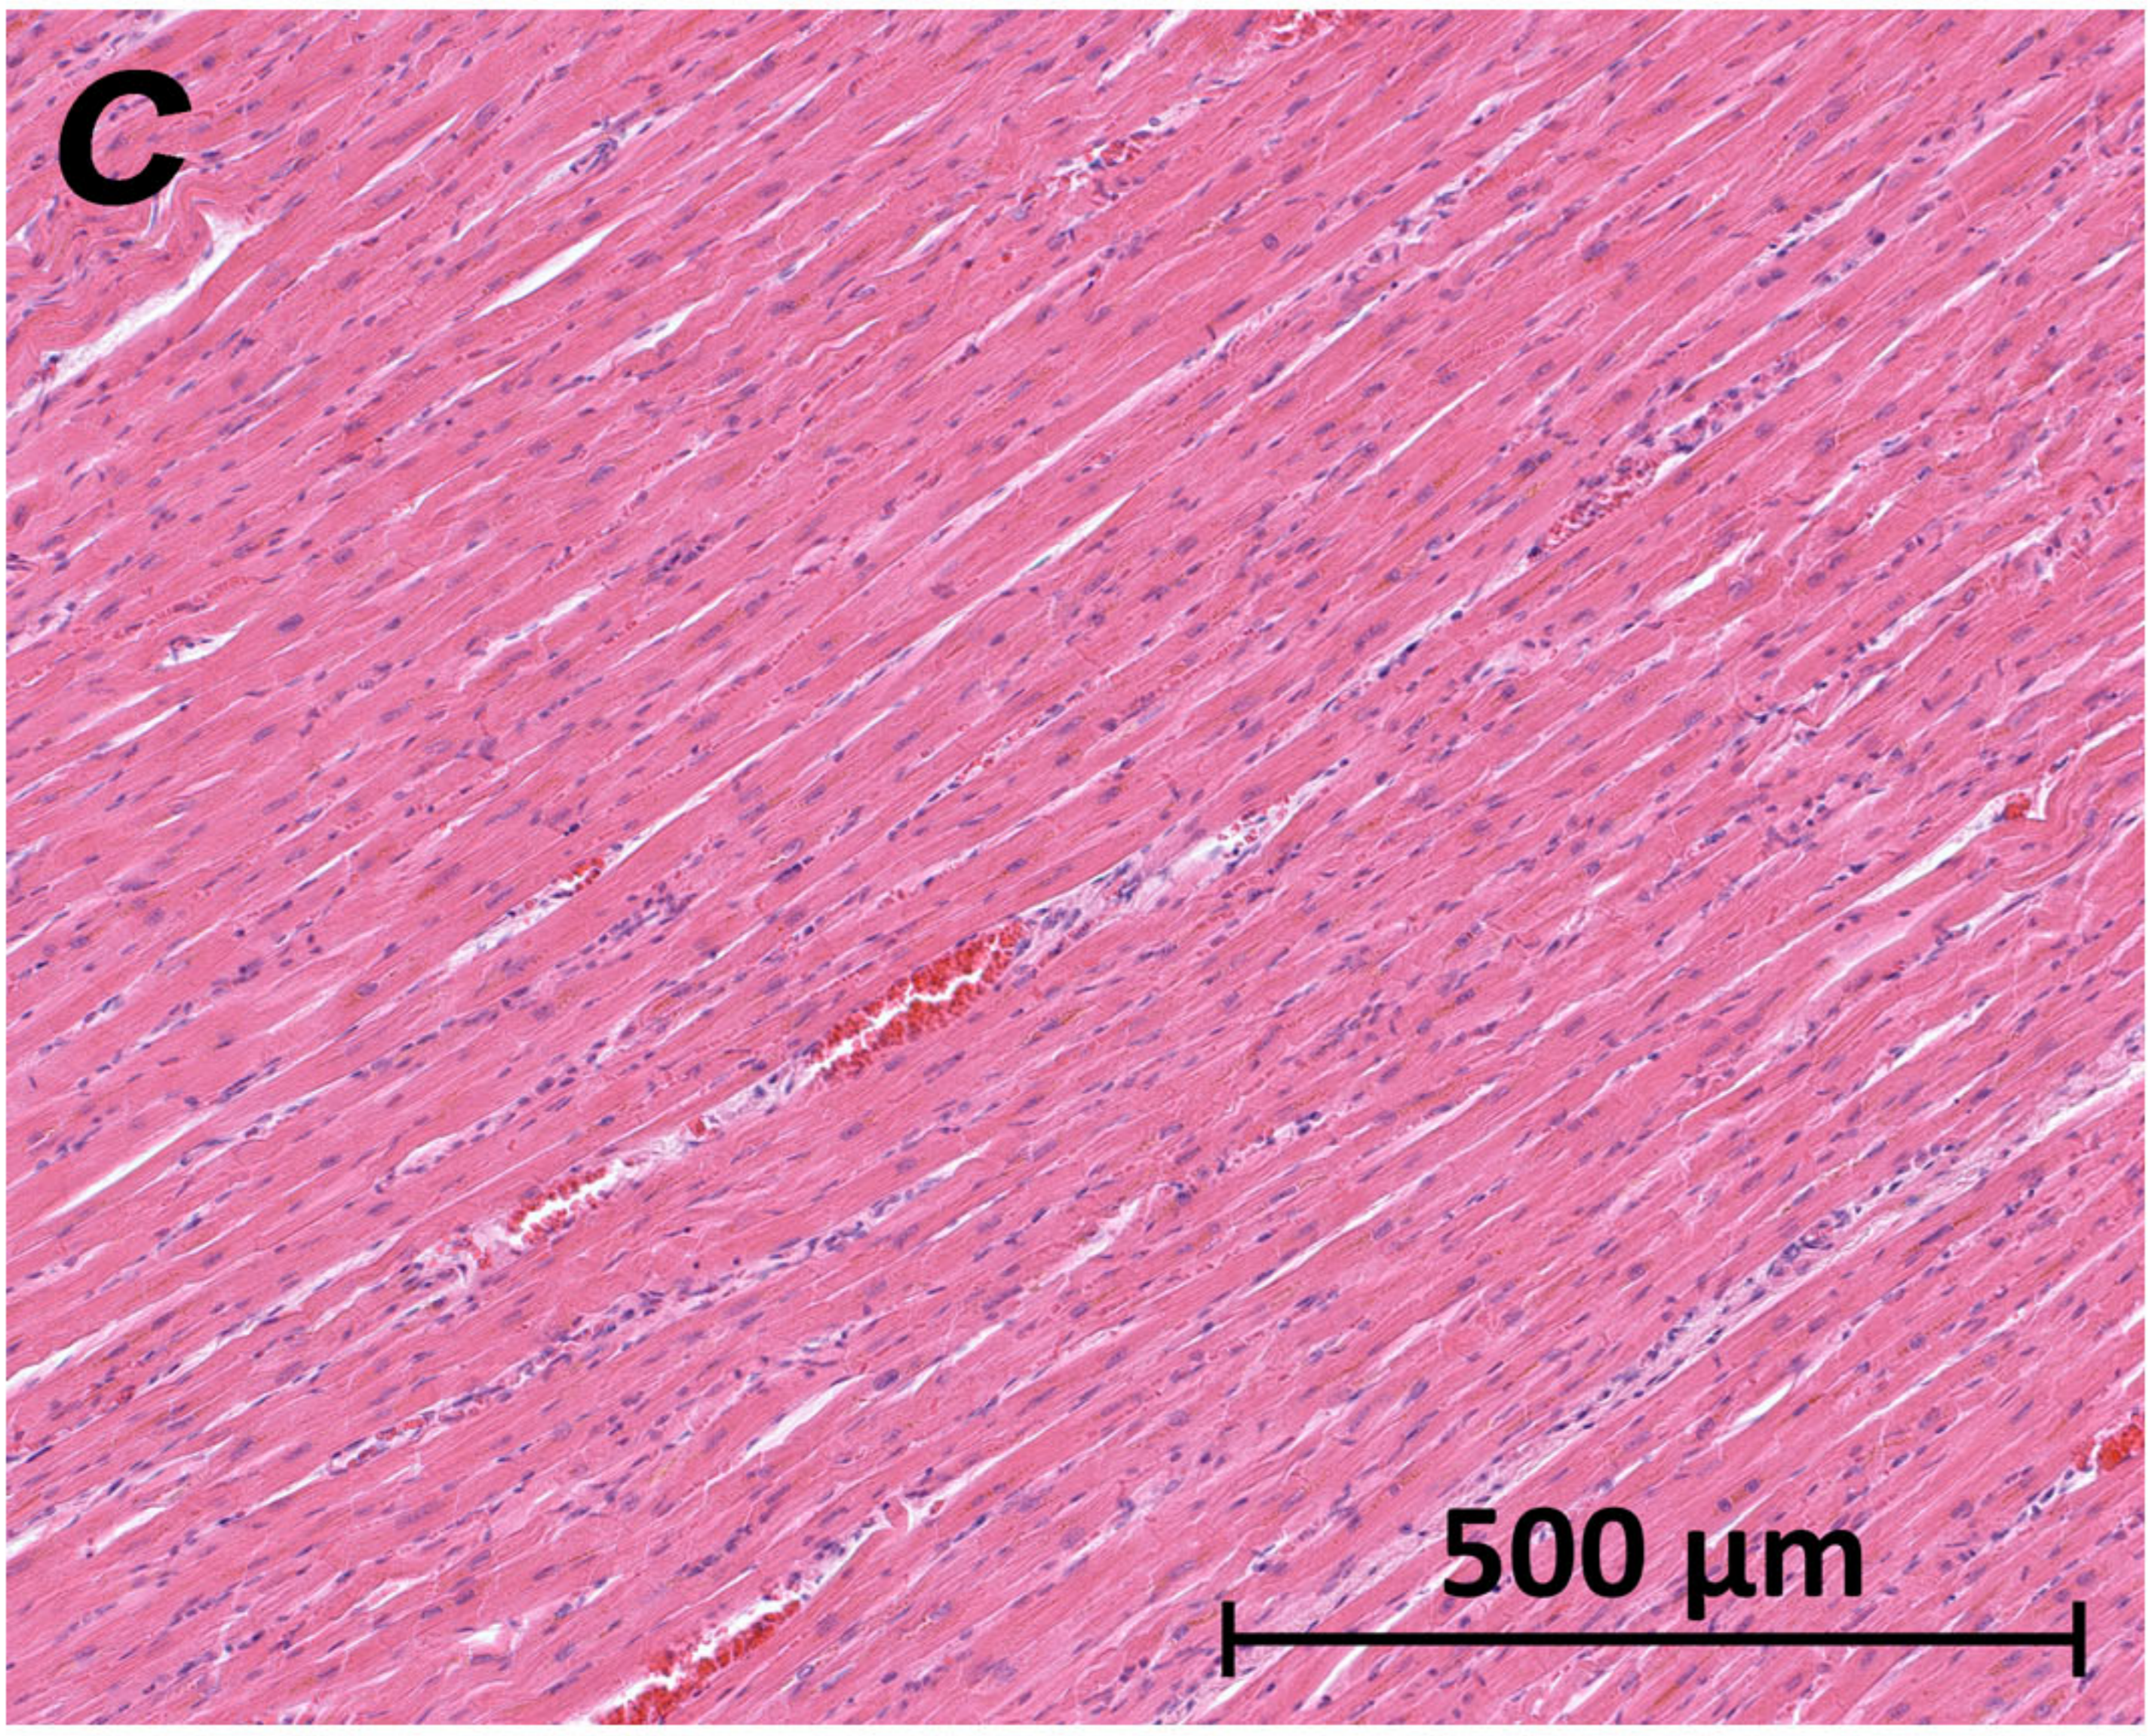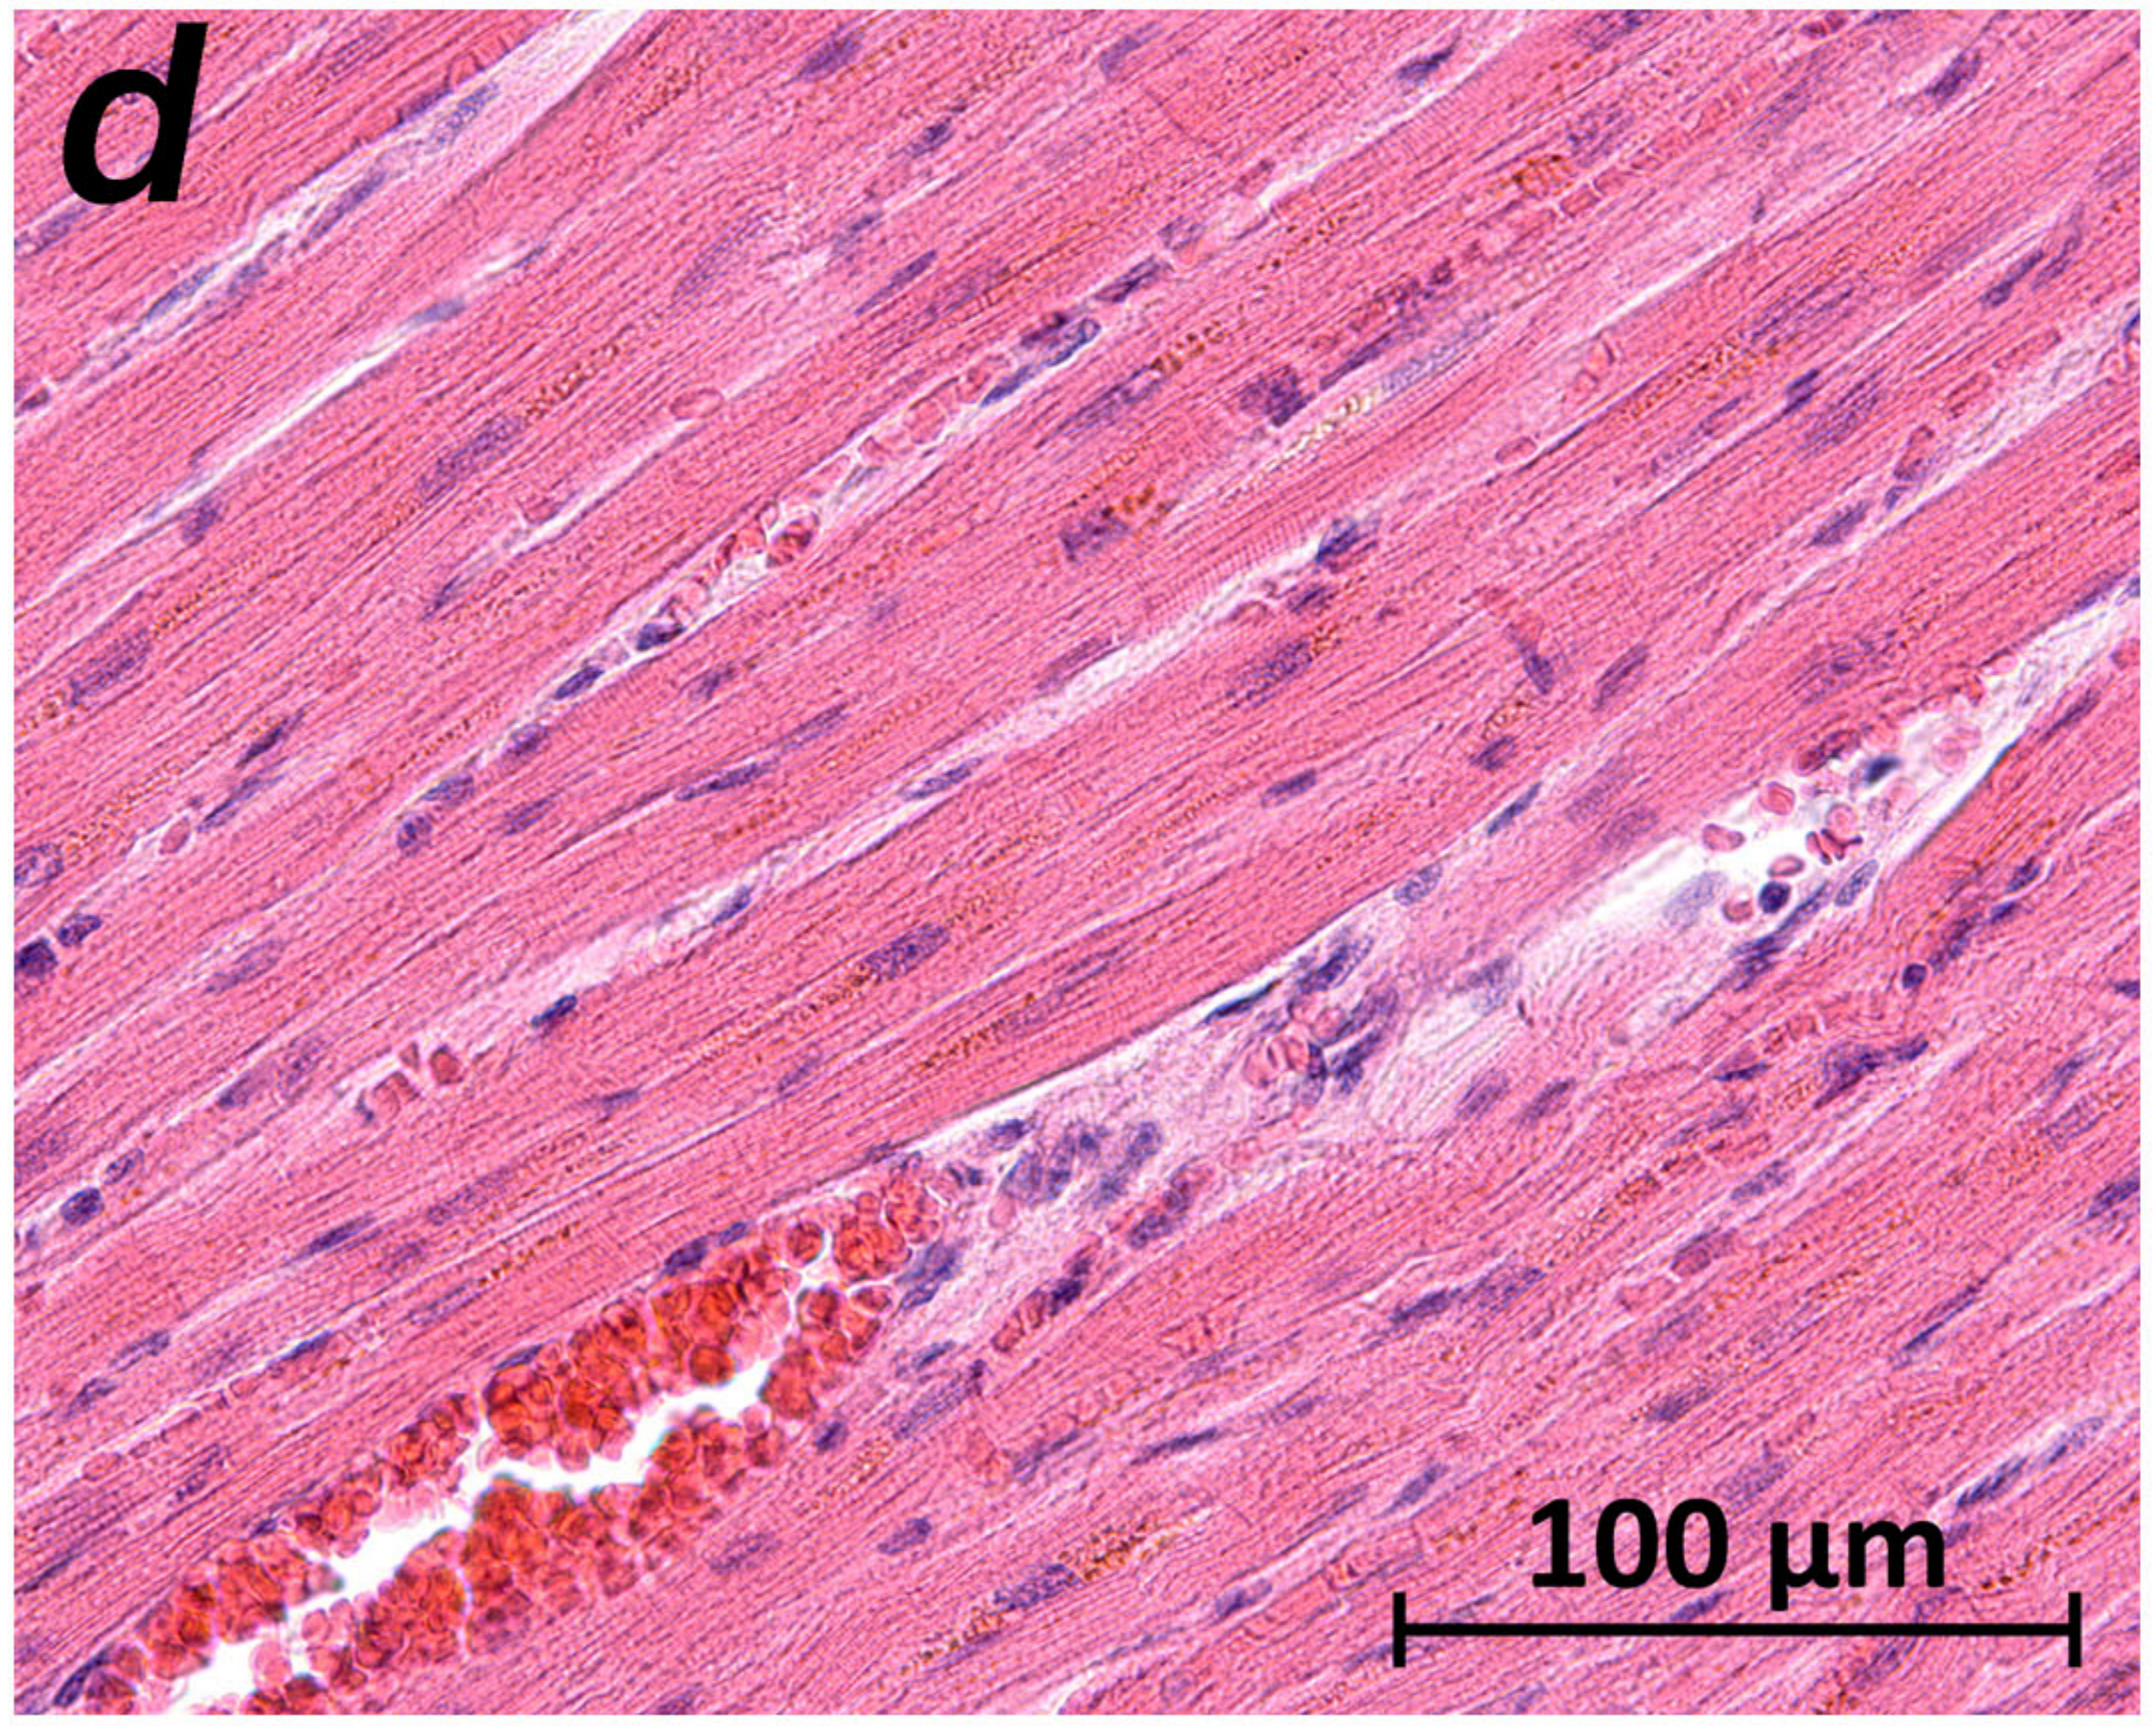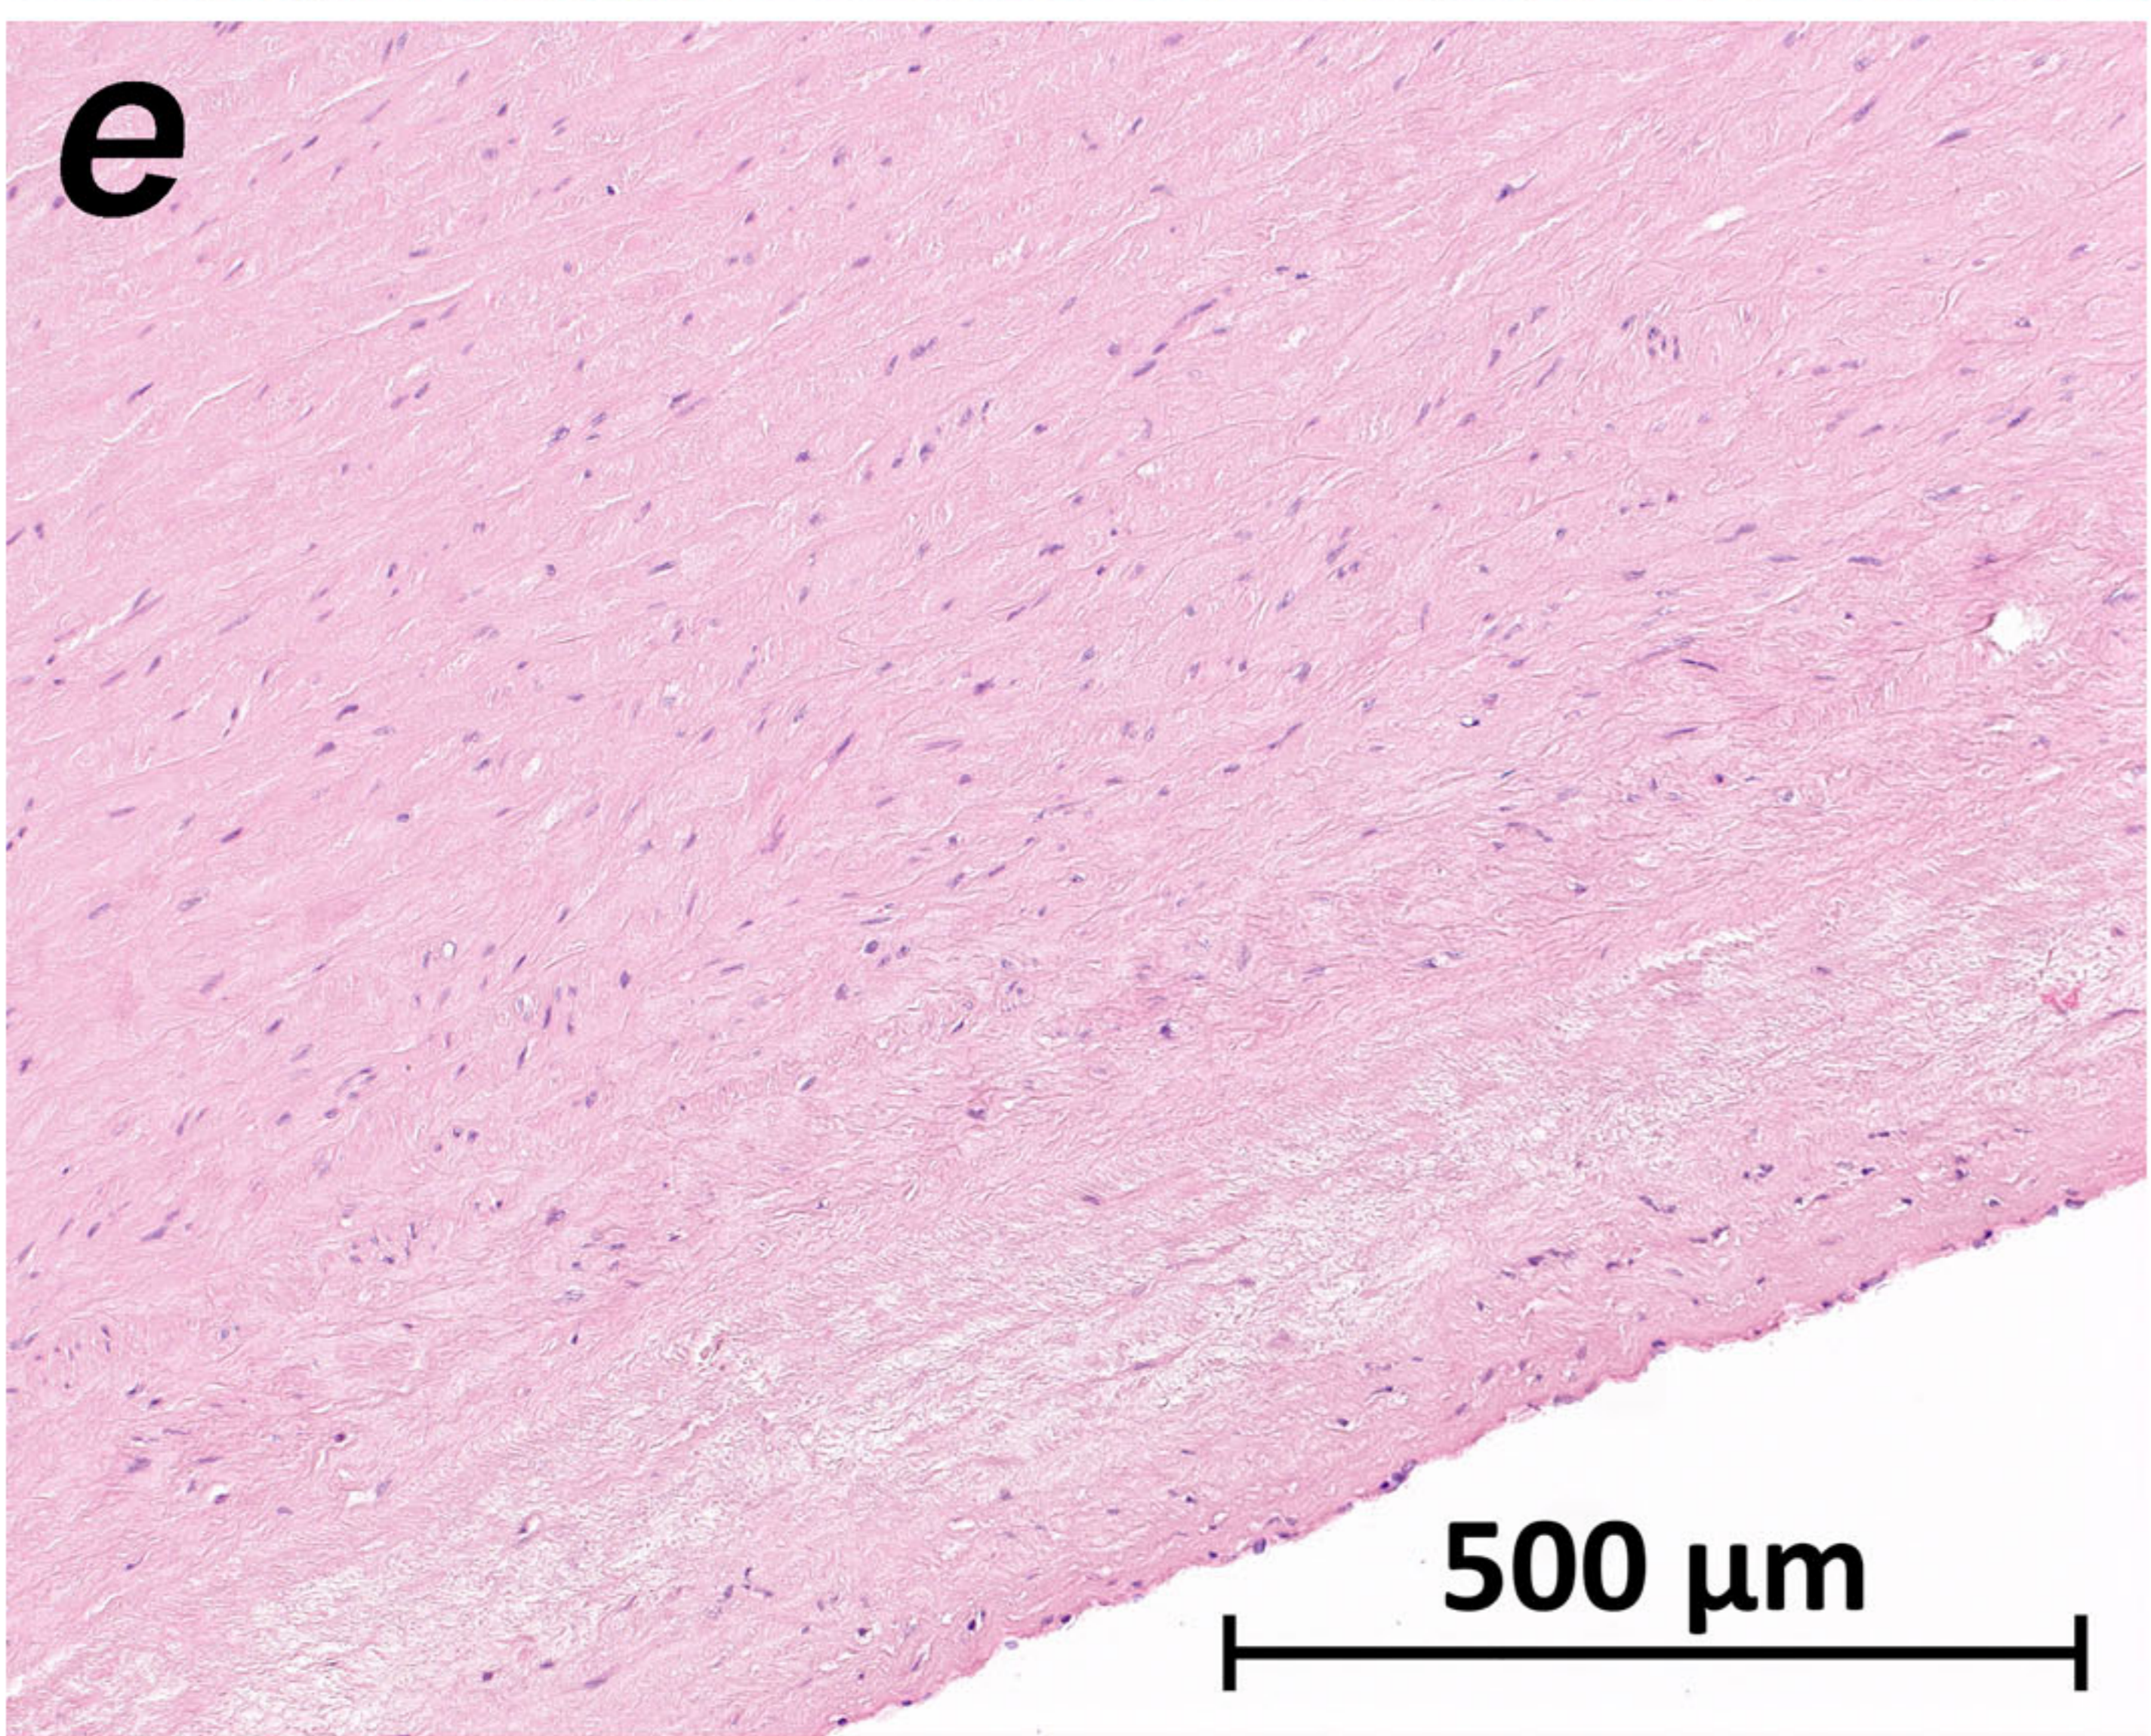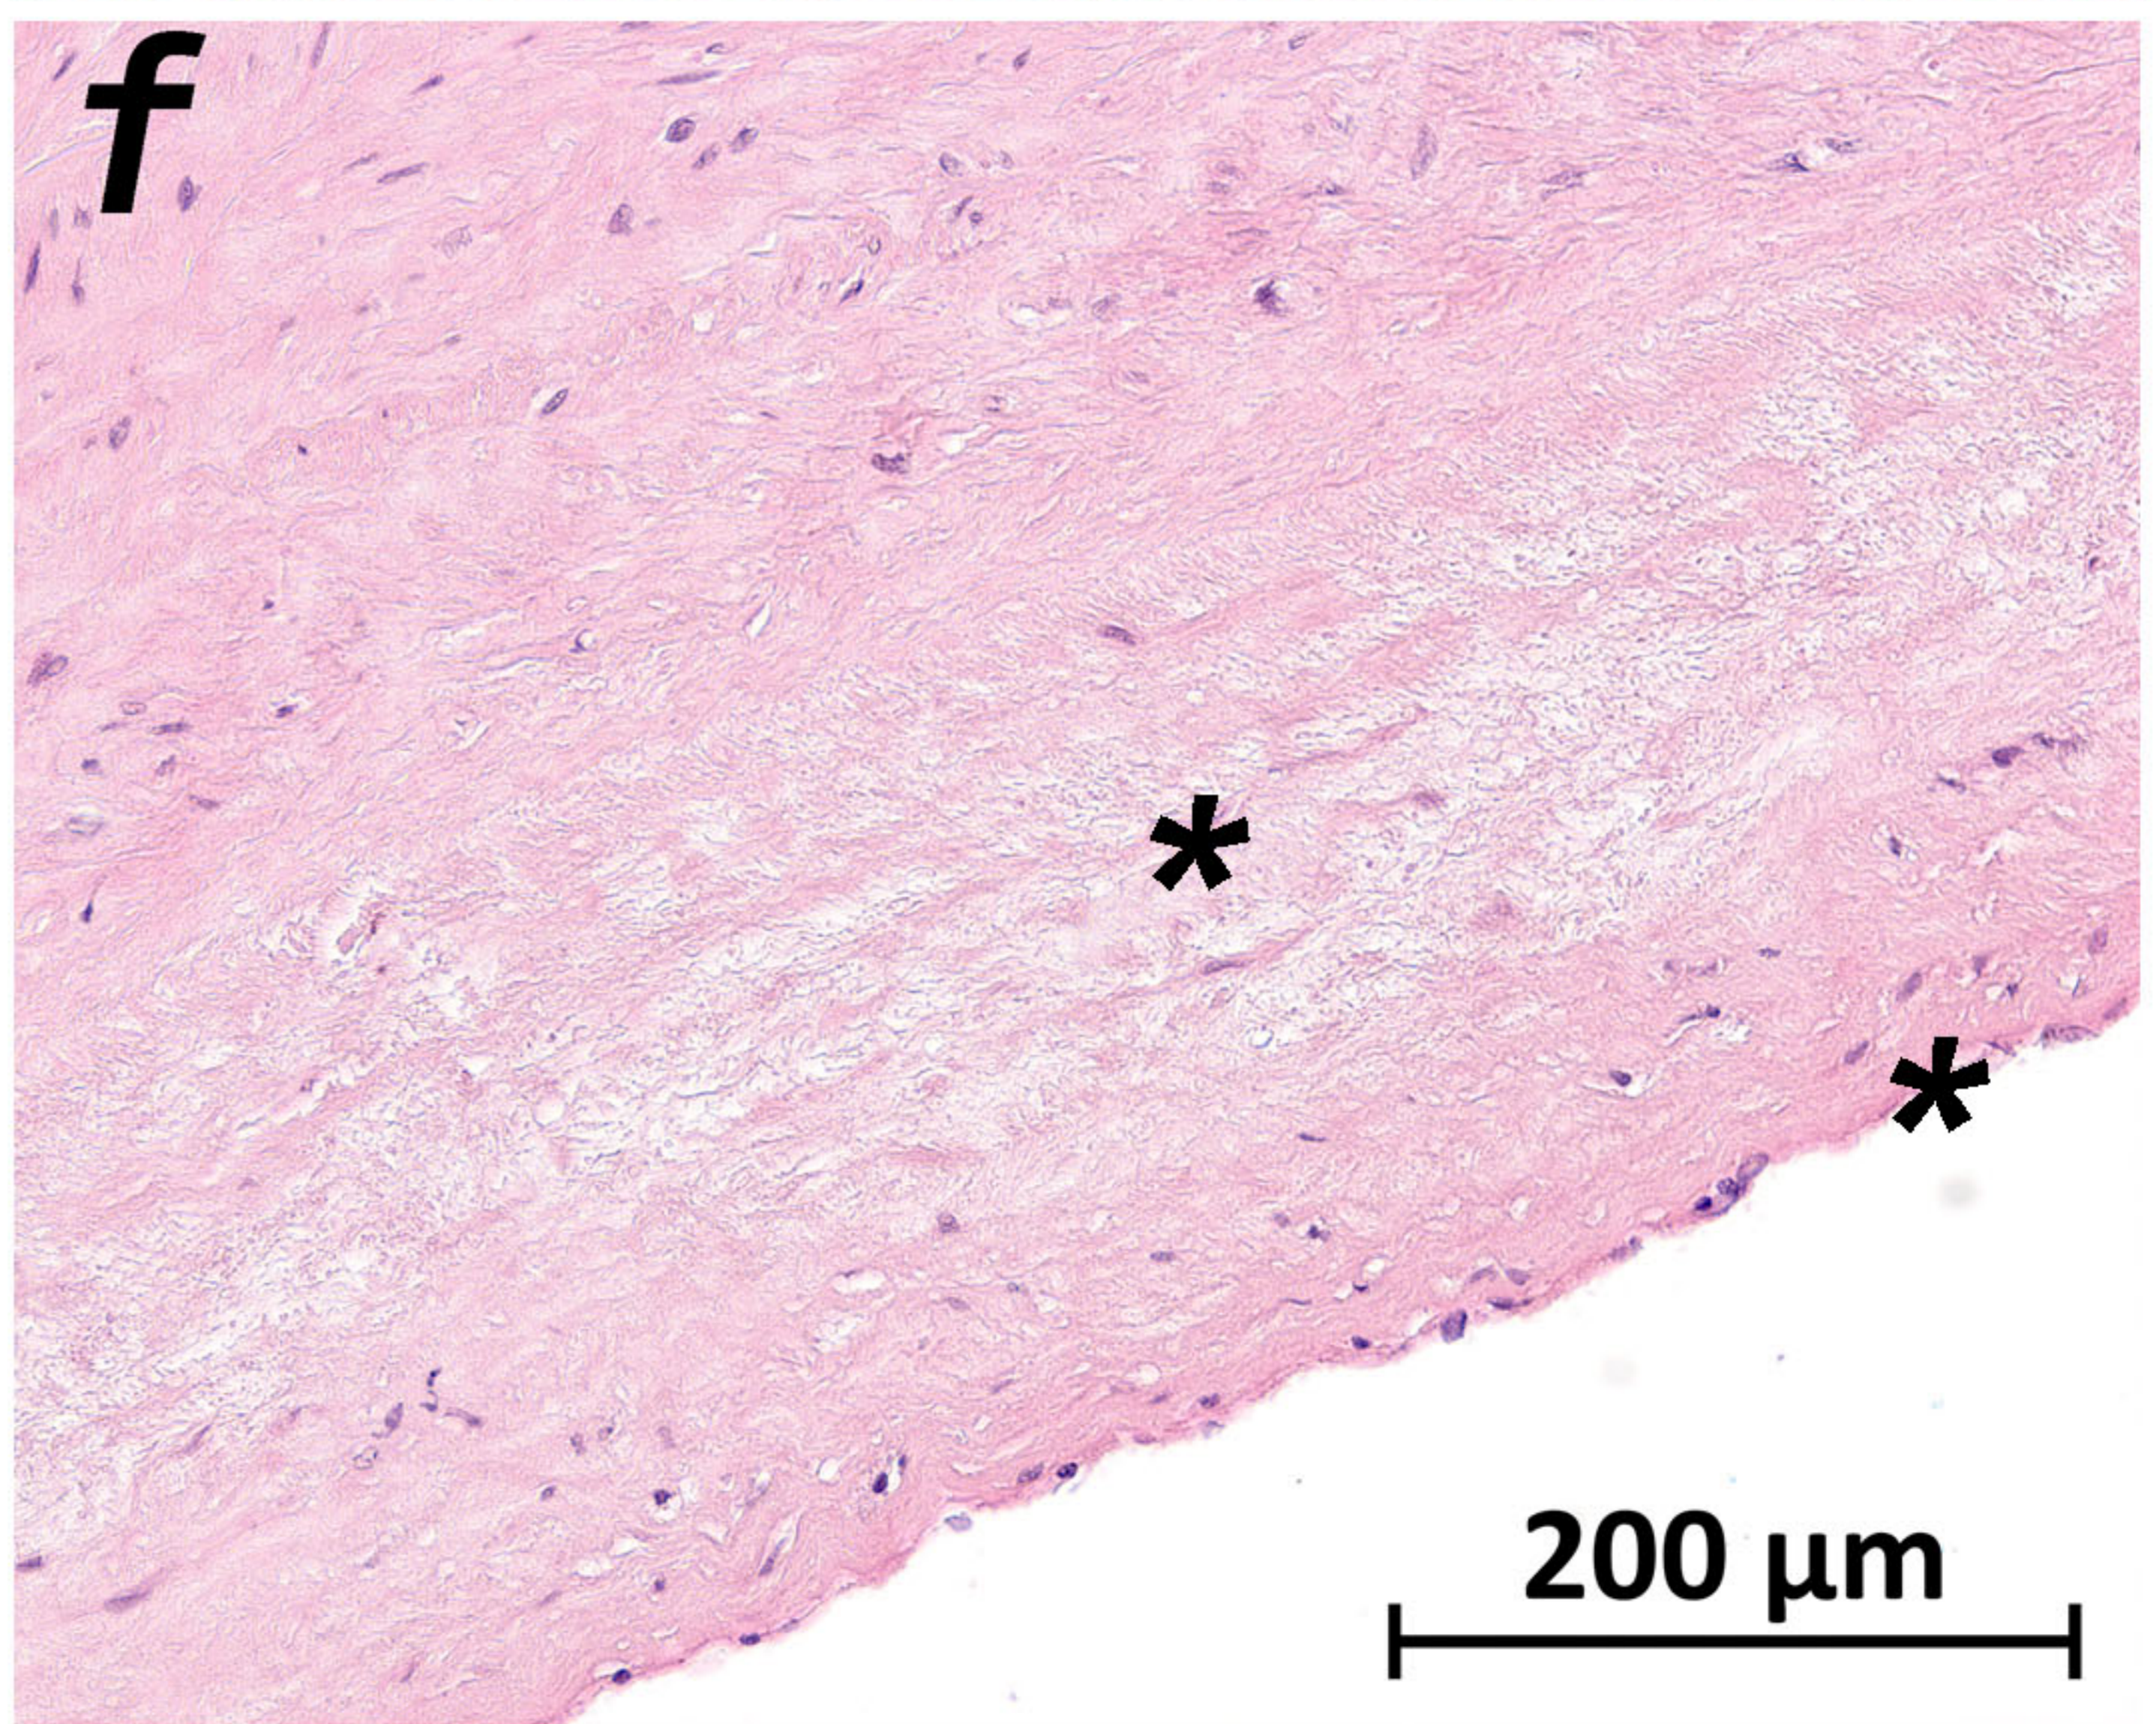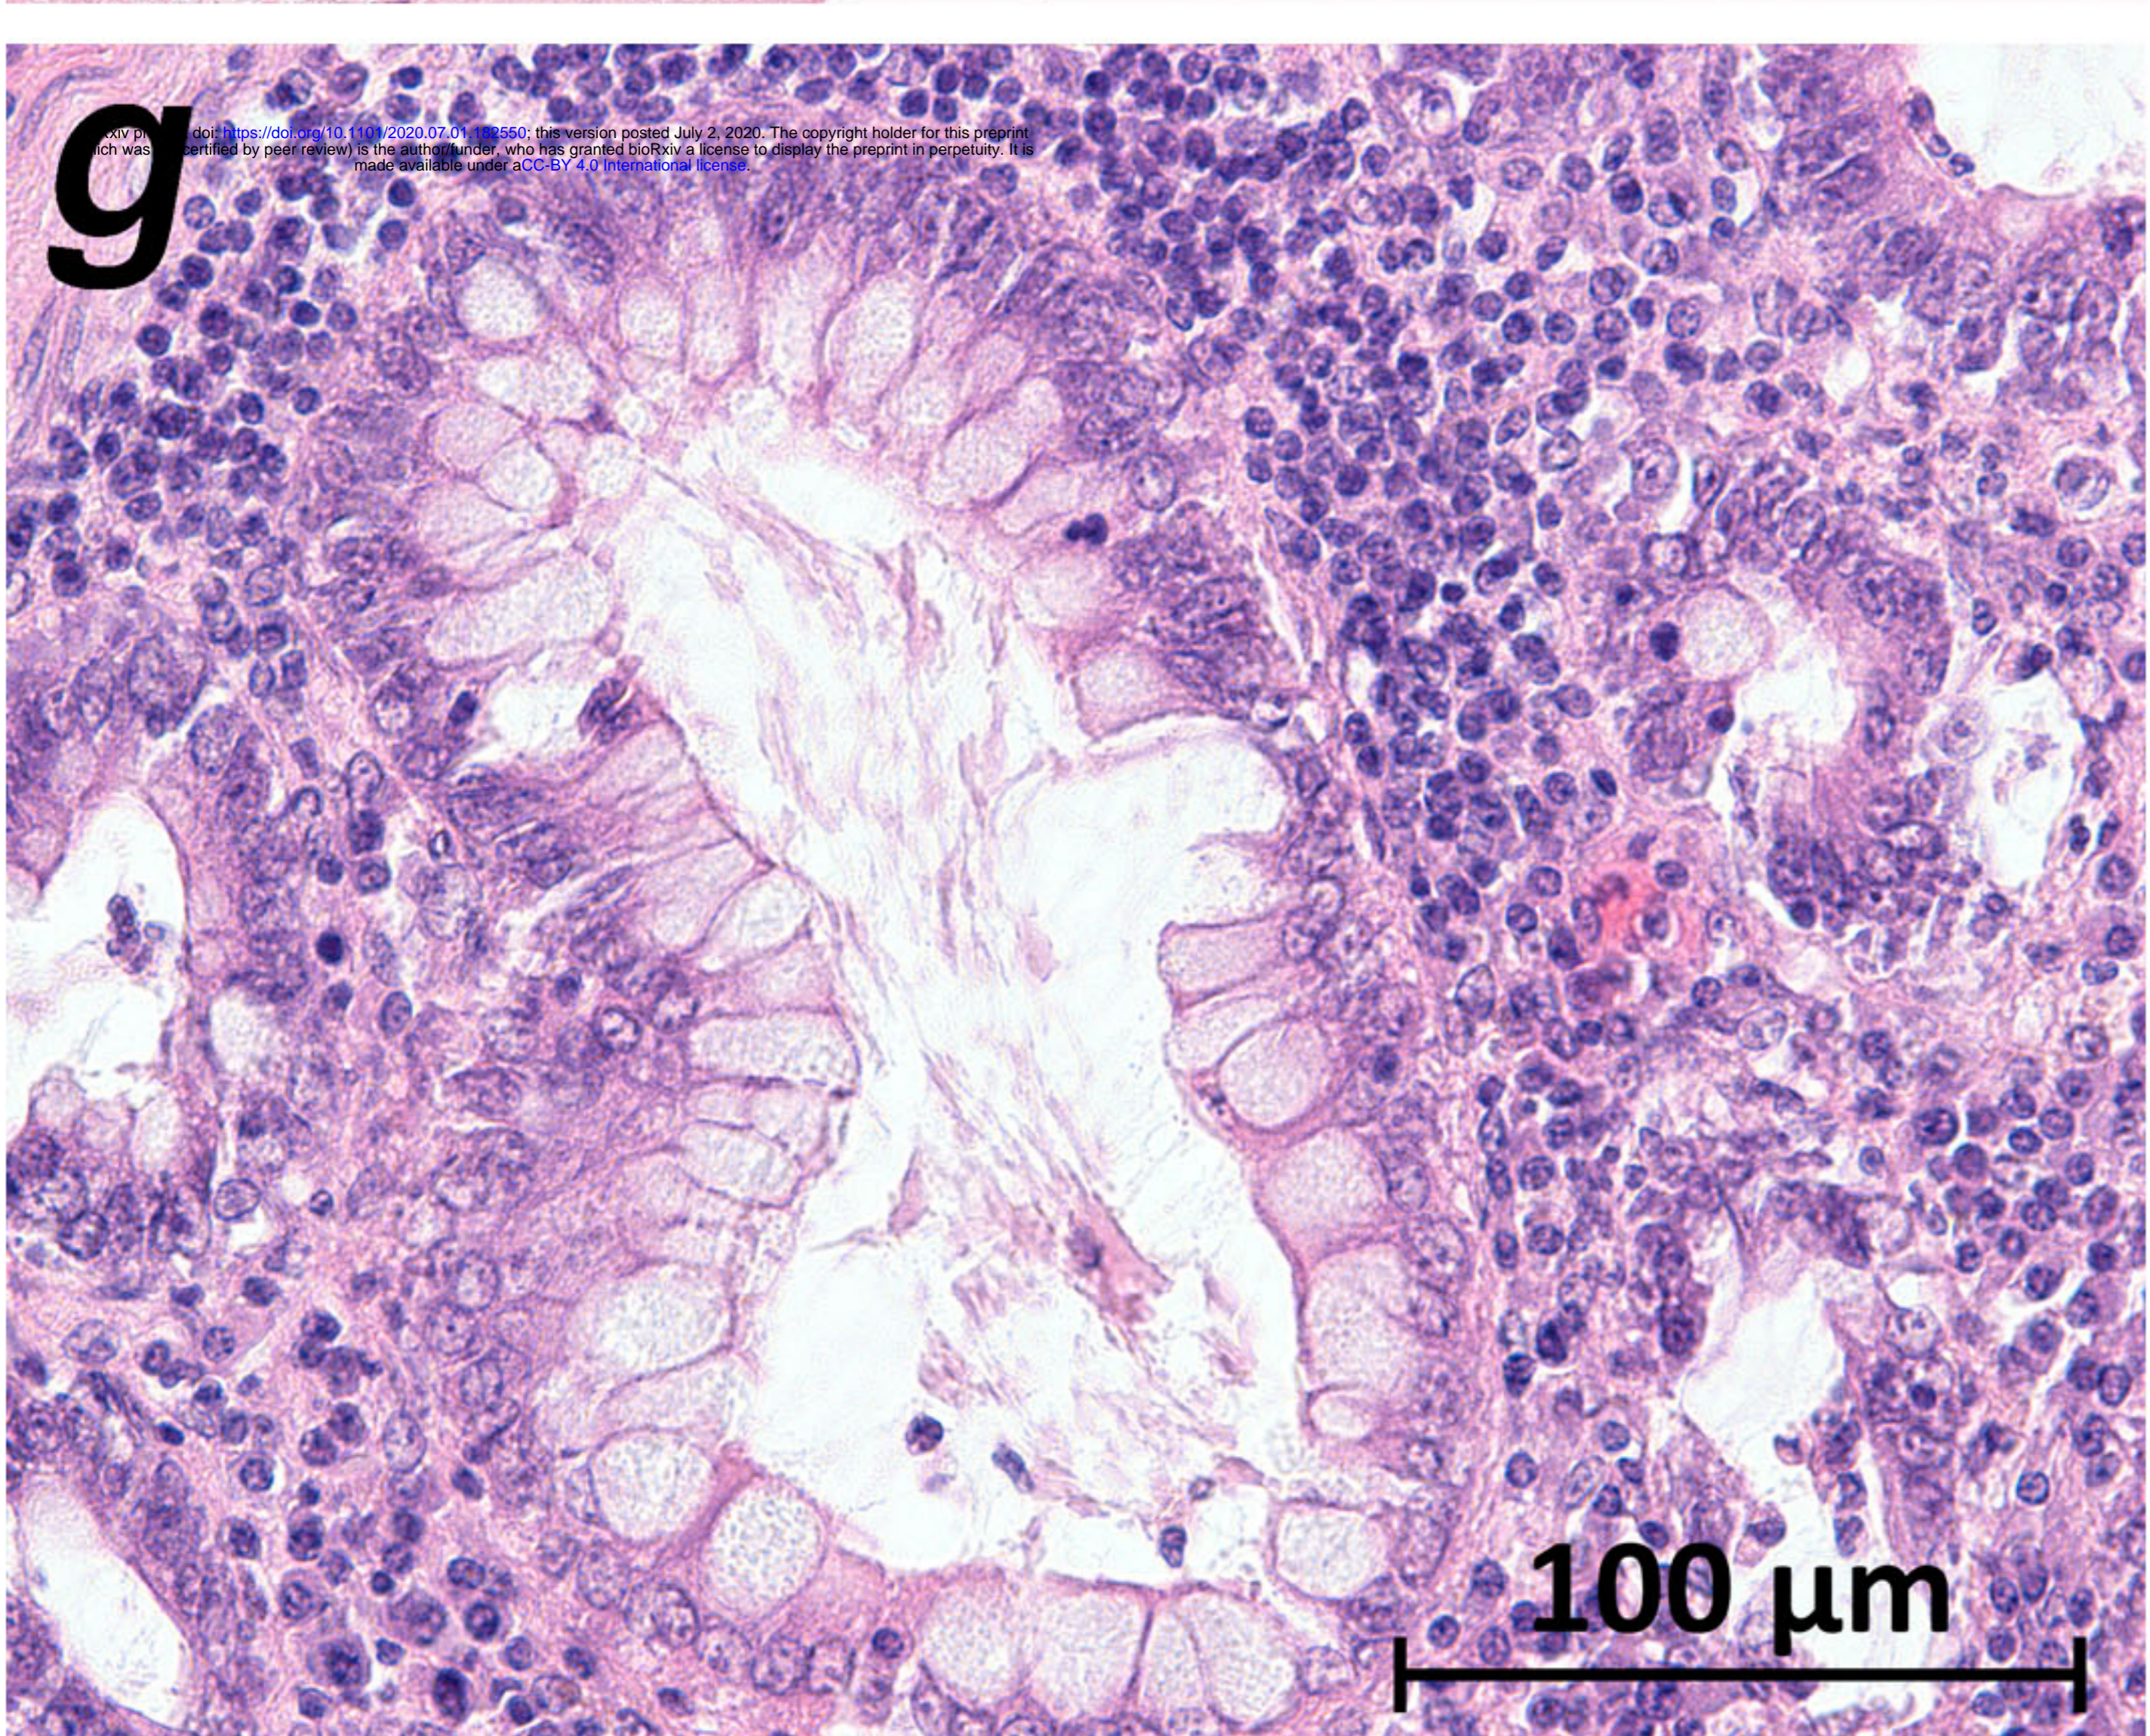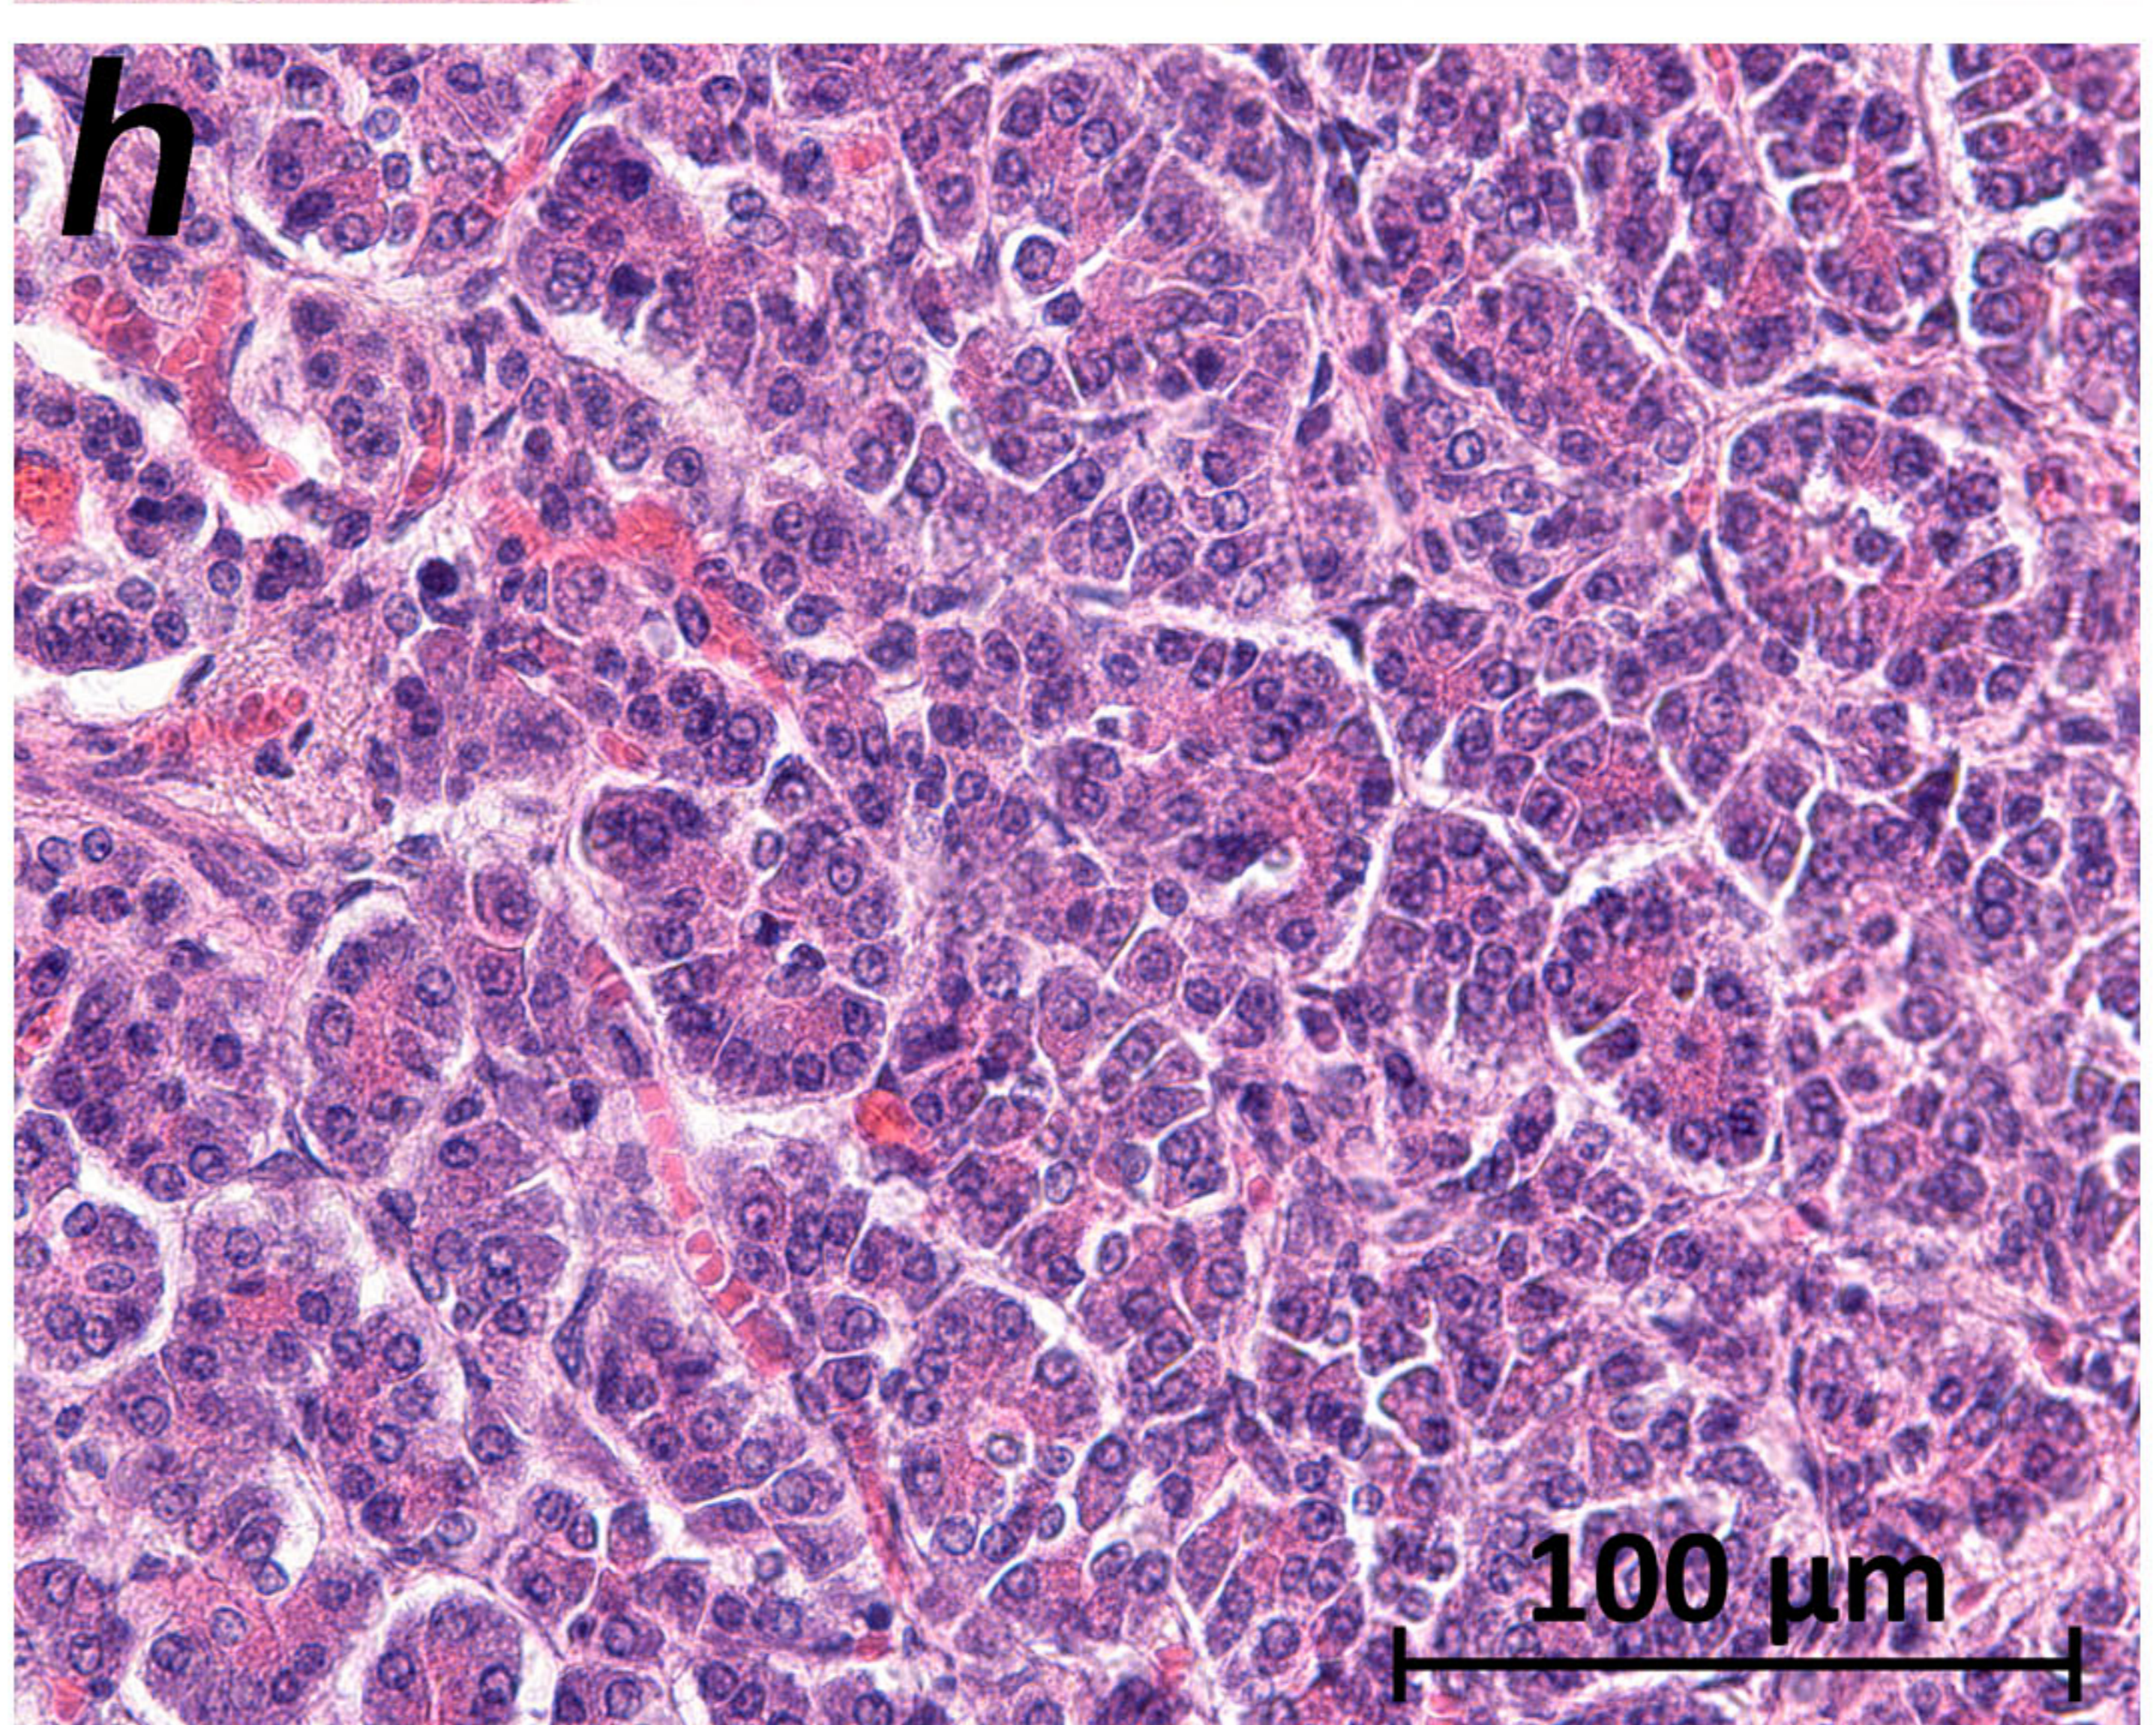

Source: https://www.biorxiv.org/content/10.1101/2020.07.01.182550v1.full.pdf
